# Supplementary material
Source: MDPI journal article supplement (https://www.mdpi.com/2071-1050/13/15/8418)
Supplement: s1 [file s1 › sustainability-1253168-supplementay.pdf]

## Supplementary Material

This document contains the imagery described in the 3.1 *Preliminary Phase* and 3.3 *Data Collection* described in the article: CAPILÉ, K. et al. Exploring the Representation of Cows on Dairy Product Packaging in Brazil and the United Kingdom. *Sustainability*, v. 13, n. 15, p. 8418, 28 jul. 2021. At the end, some tables with the raw collected data are provided for further investigations.

## Contents

|                                          |           |
|------------------------------------------|-----------|
| <b>1. Preliminary Phase imagery</b>      | <b>2</b>  |
| 1.1. Dairy in Brazil                     | 2         |
| 1.2. Dairy in UK                         | 4         |
| 1.3. Eggs in Brazil                      | 10        |
| 1.4. Eggs in UK                          | 11        |
| 1.5. Meat in Brazil                      | 12        |
| 1.6. Meat in UK                          | 14        |
| <b>2. Data Collection imagery</b>        | <b>28</b> |
| 2.1. Brazil: Carrefour                   | 28        |
| 2.2. Brazil: Extra                       | 30        |
| 2.3. Brazil: Prezunic                    | 32        |
| 2.4. UK: Aldi                            | 34        |
| 2.5. UK: Asda                            | 35        |
| 2.6. UK: Tesco                           | 38        |
| <b>3. Brazil: Carrefour Data</b>         | <b>40</b> |
| <b>4. Brazil: Extra Supermarket Data</b> | <b>44</b> |
| <b>5. Brazil: Prezunic Data</b>          | <b>48</b> |
| <b>6. UK: Aldi Data</b>                  | <b>52</b> |
| 6.1. Selected package images from Aldi   | 54        |
| <b>7. UK: Asda Data</b>                  | <b>57</b> |
| <b>8. UK: Tesco Data</b>                 | <b>62</b> |

## 1. Preliminary Phase imagery

### 1.1. Dairy in Brazil

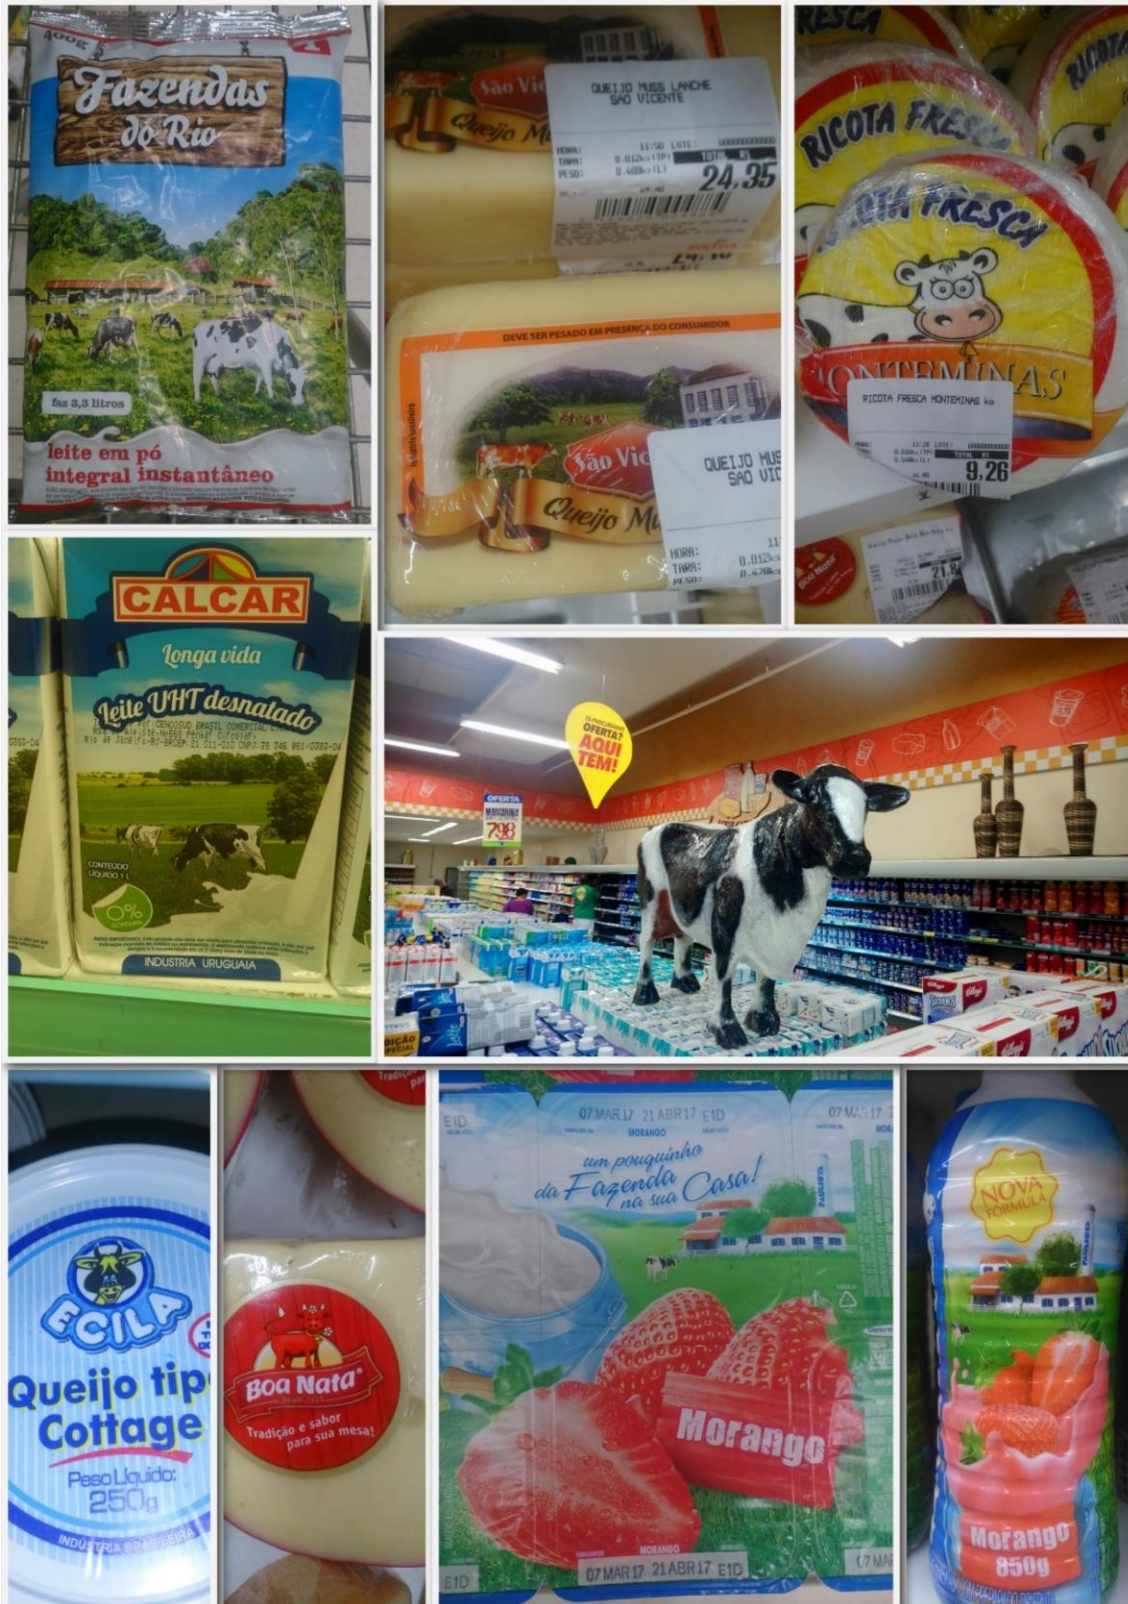

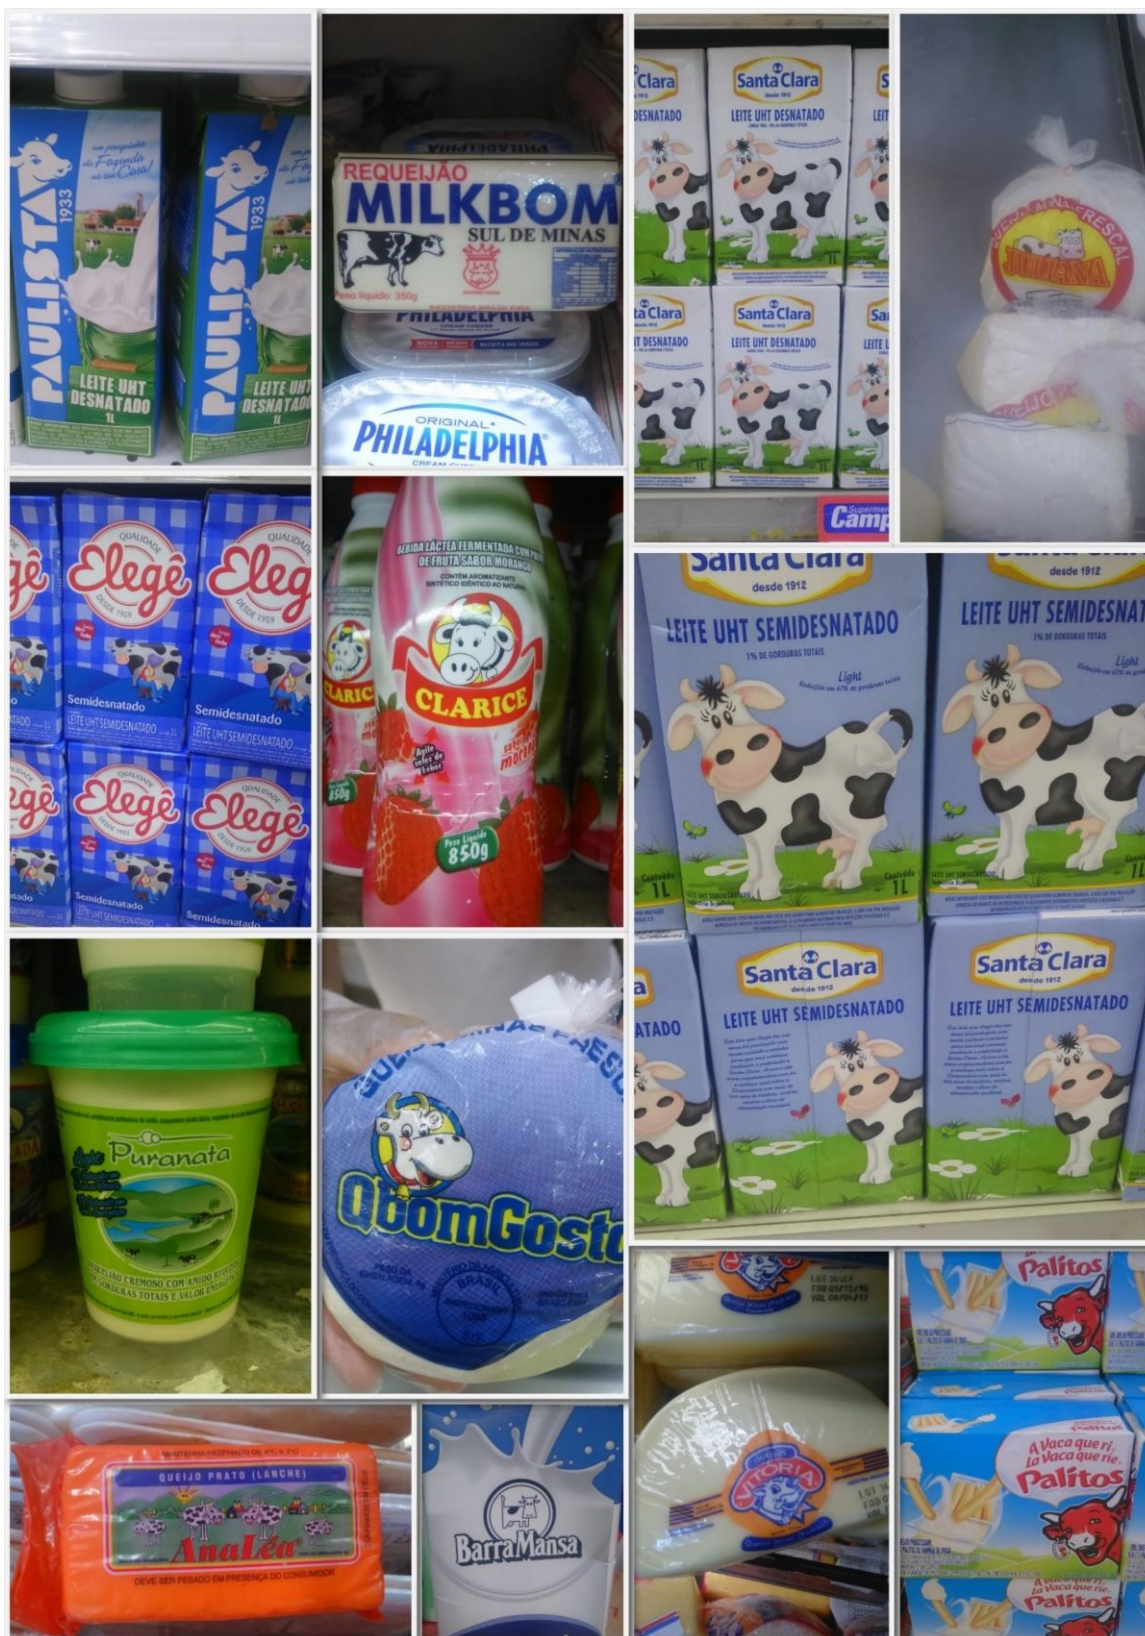

Figure S1. Examples of images from dairy packages from Brazil.

1.2. Dairy in UK

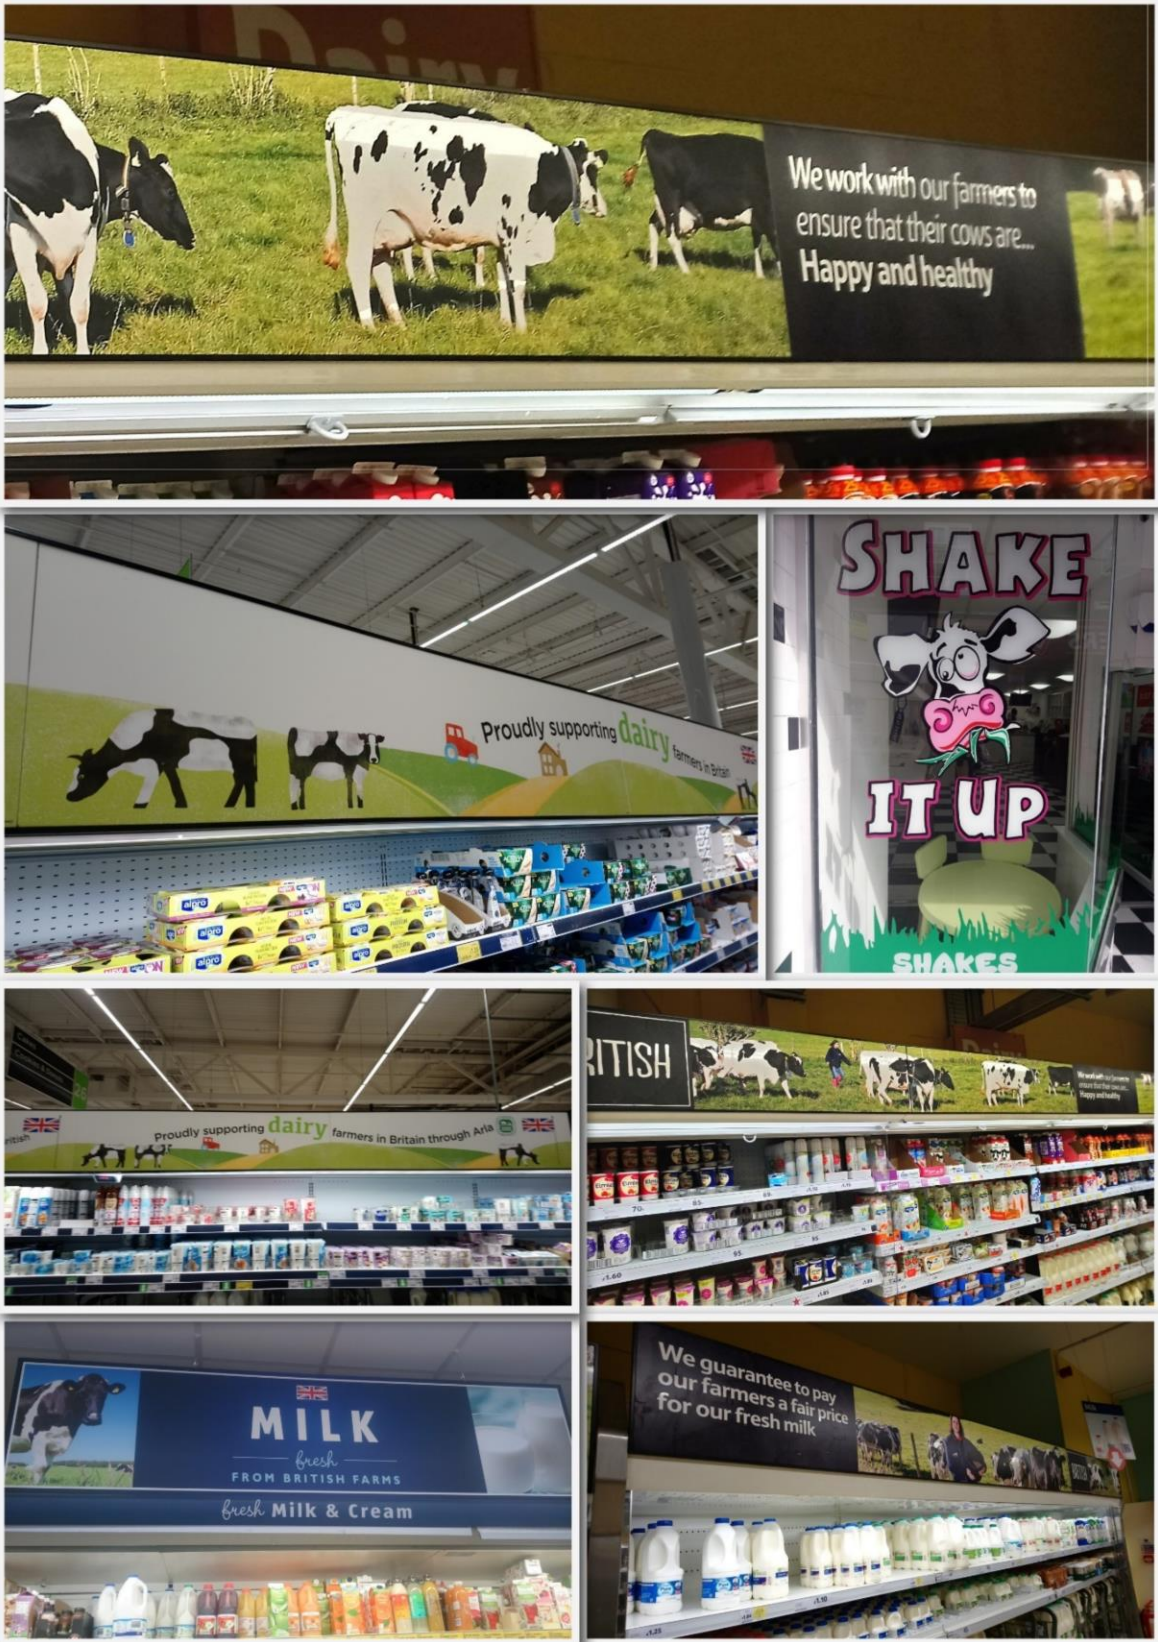

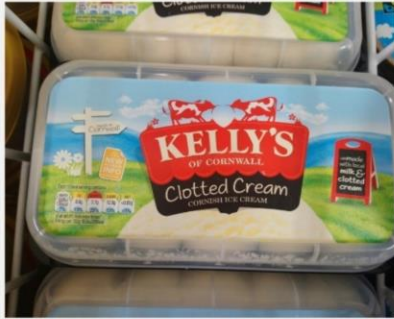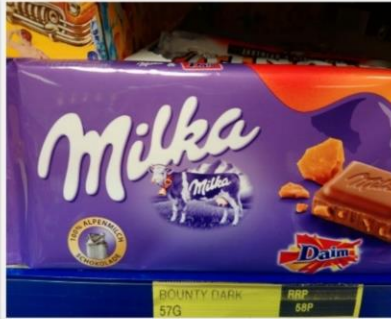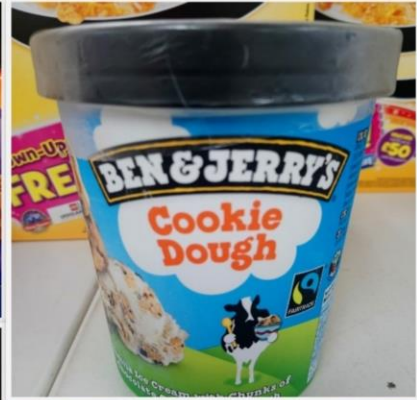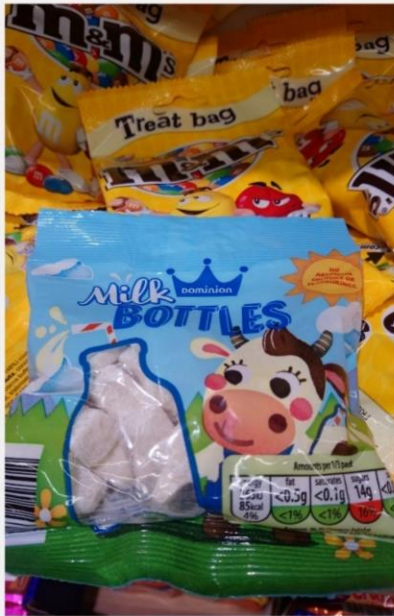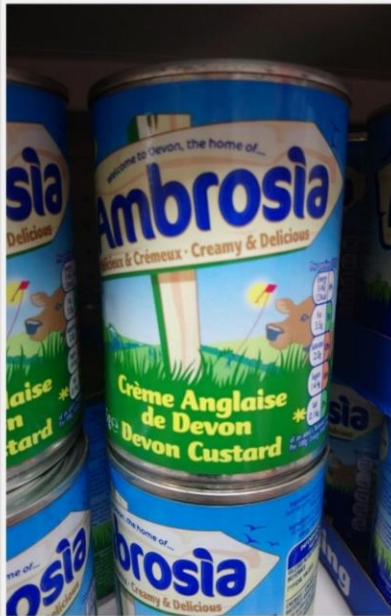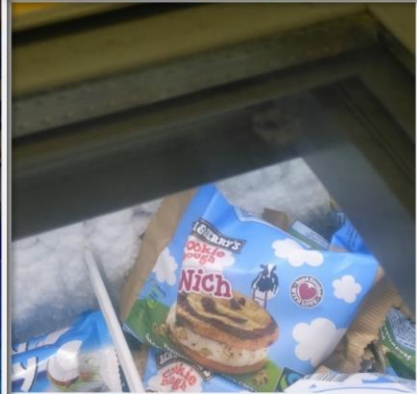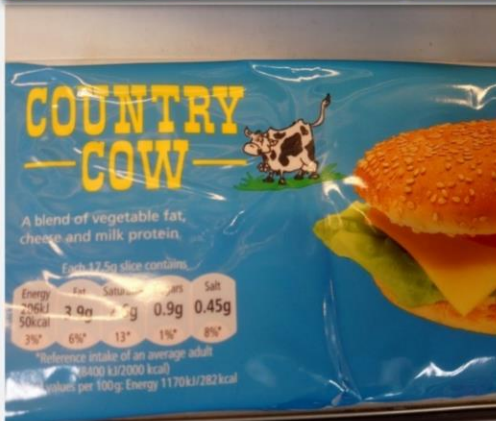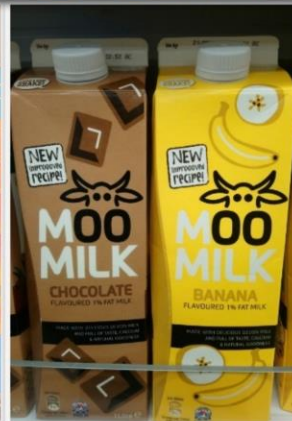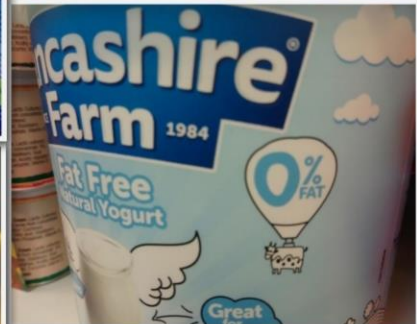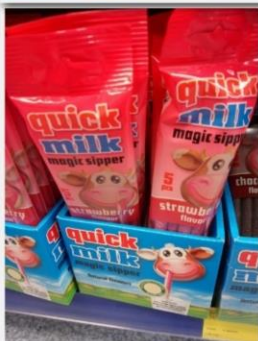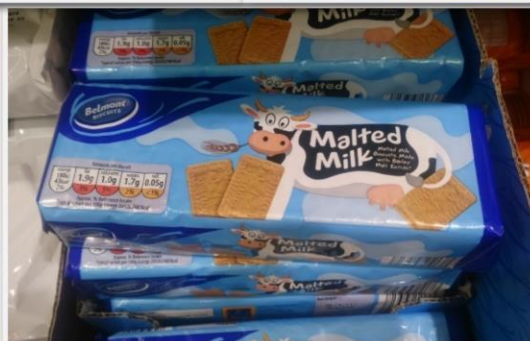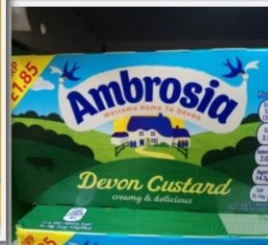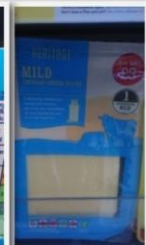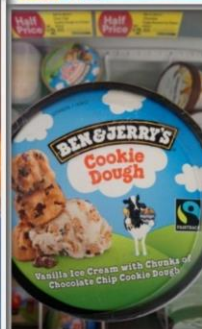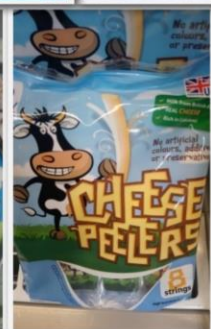

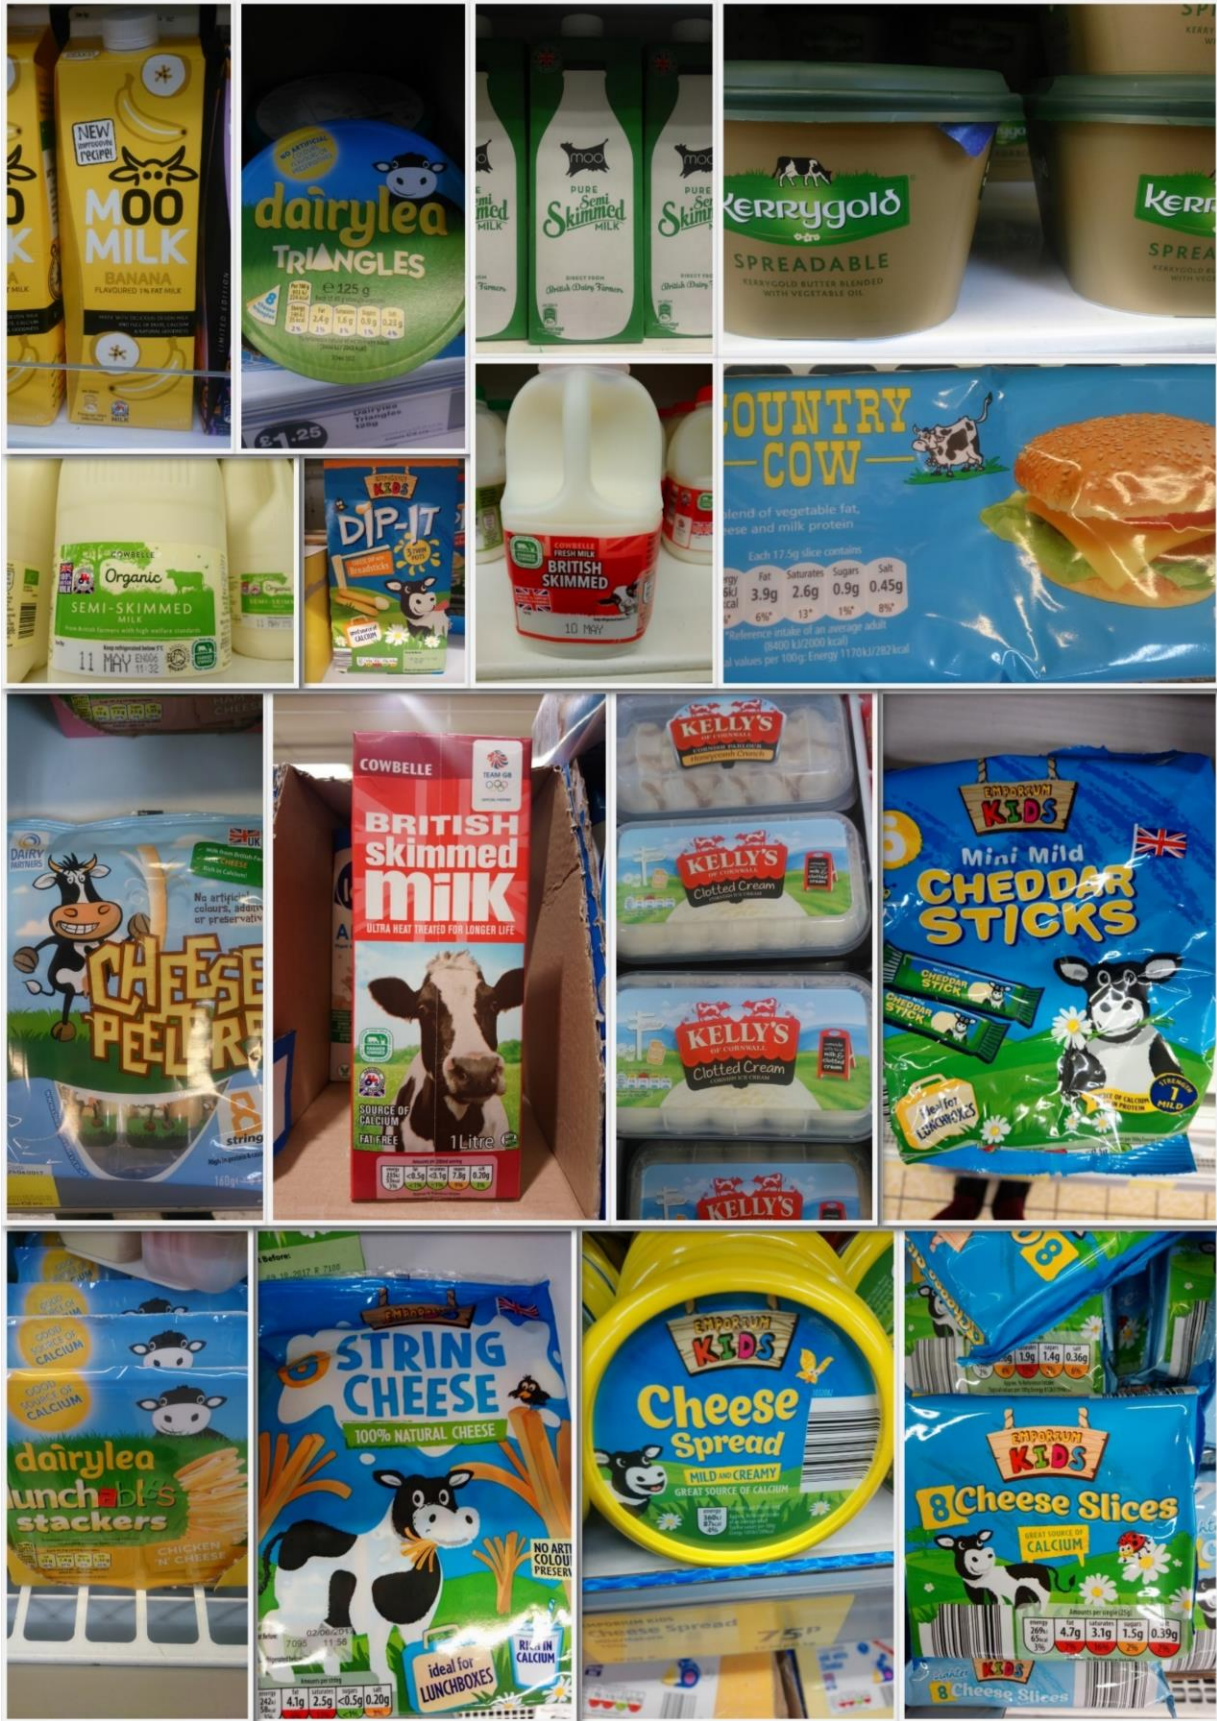

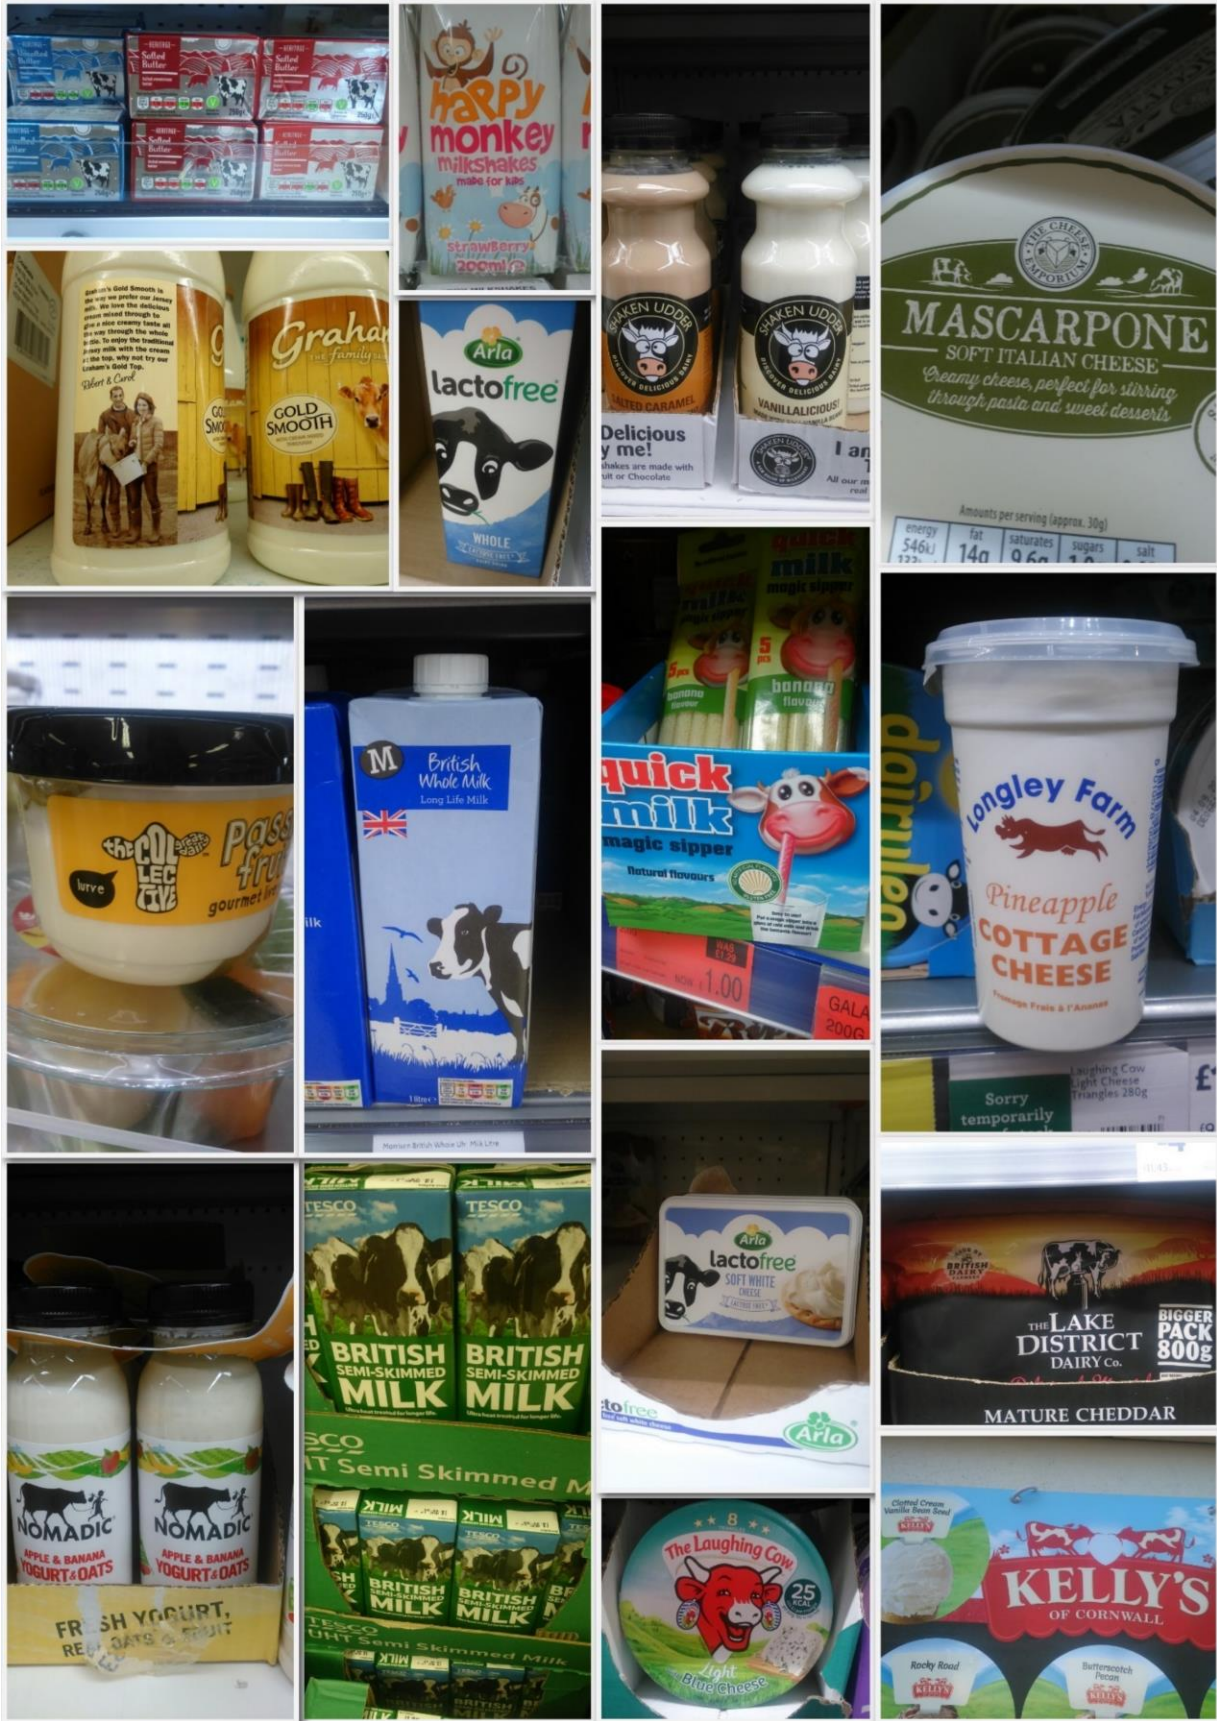

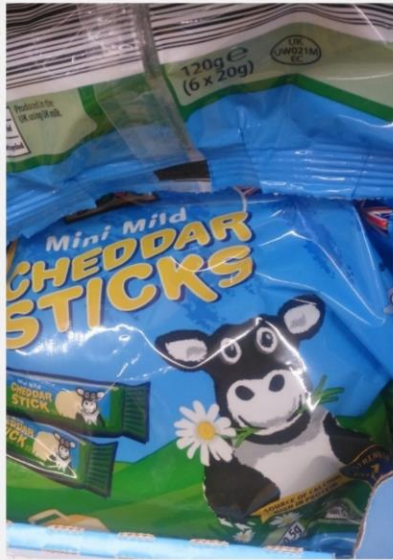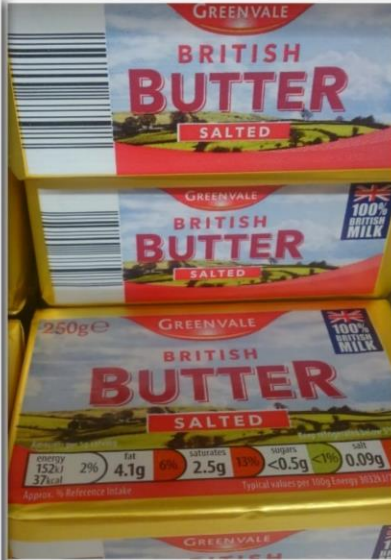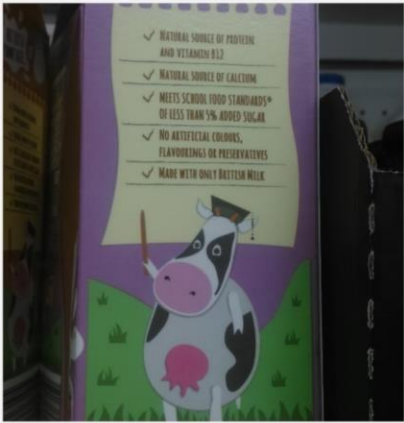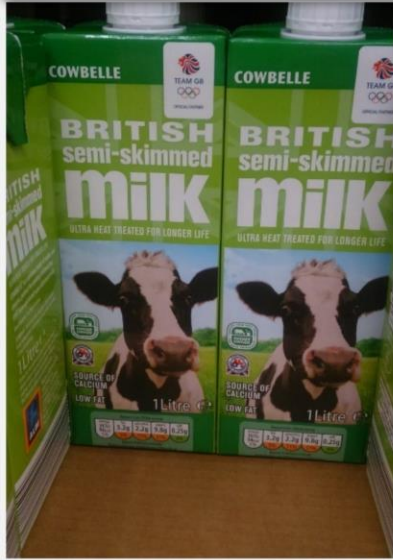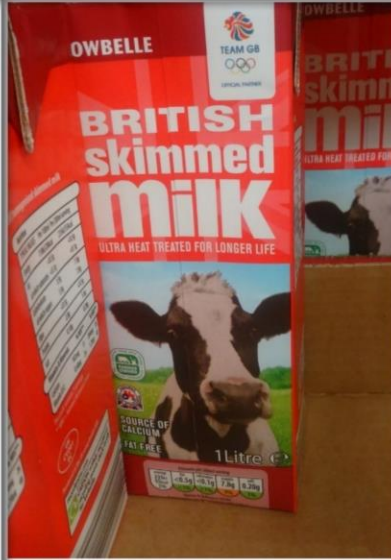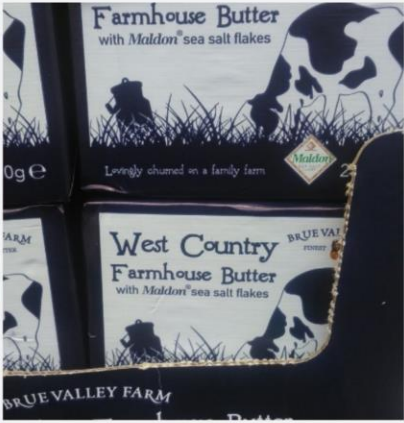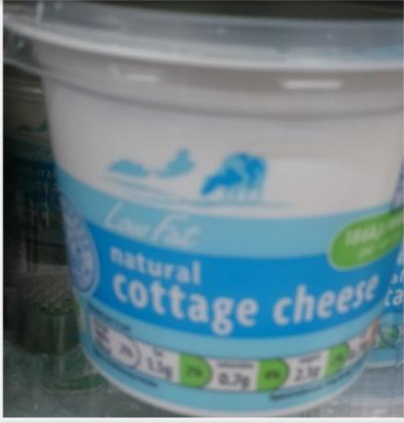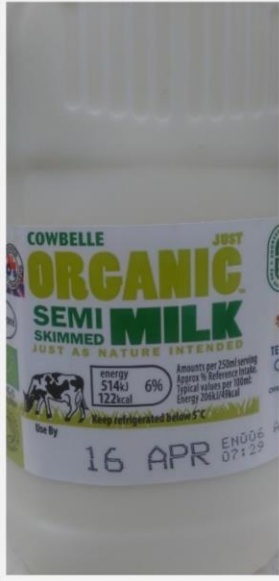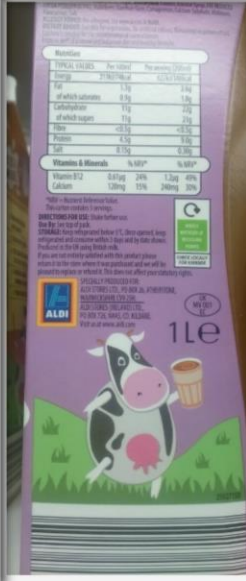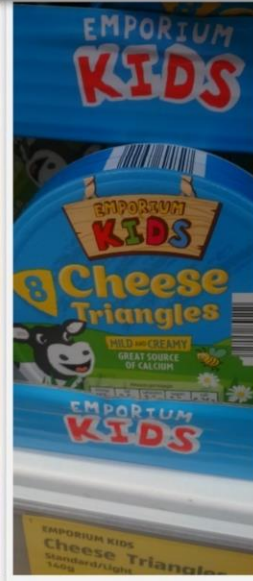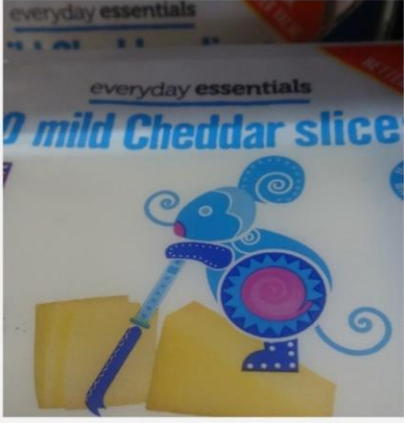



## 1.3. Eggs in Brazil

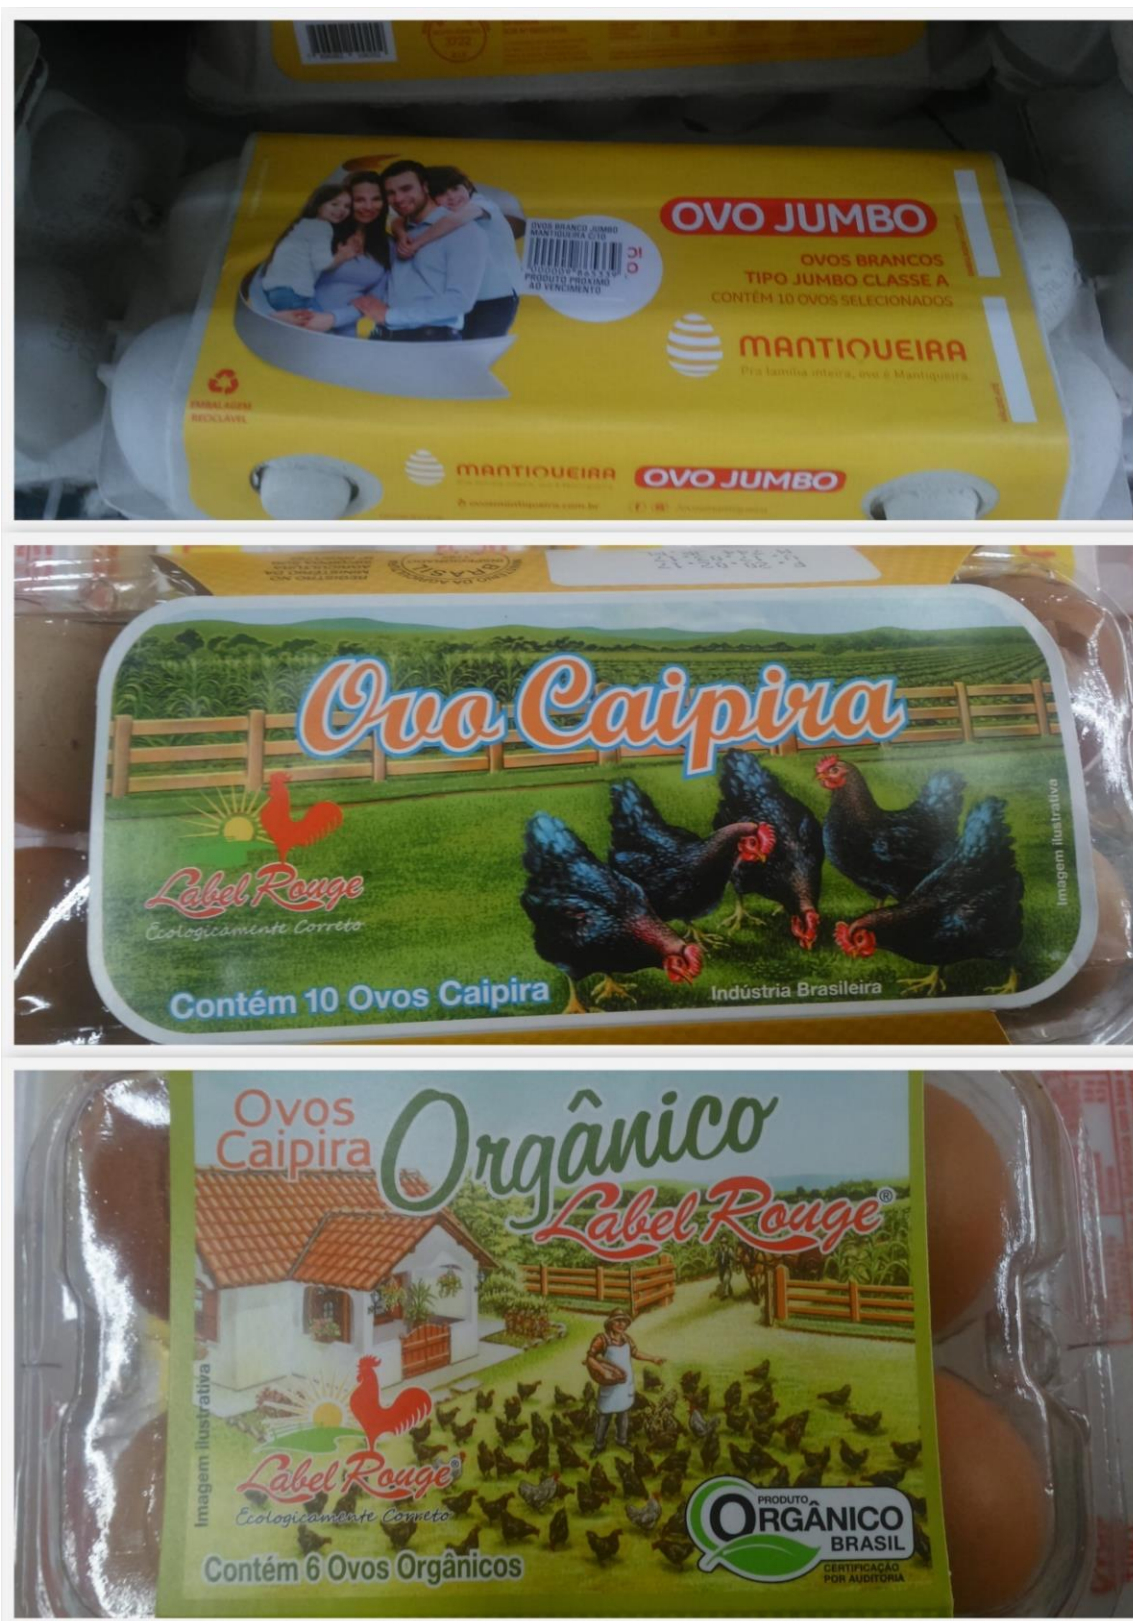

**Figure S3.** Examples of images from eggs packages from Brazil.

## 1.4. Eggs in UK

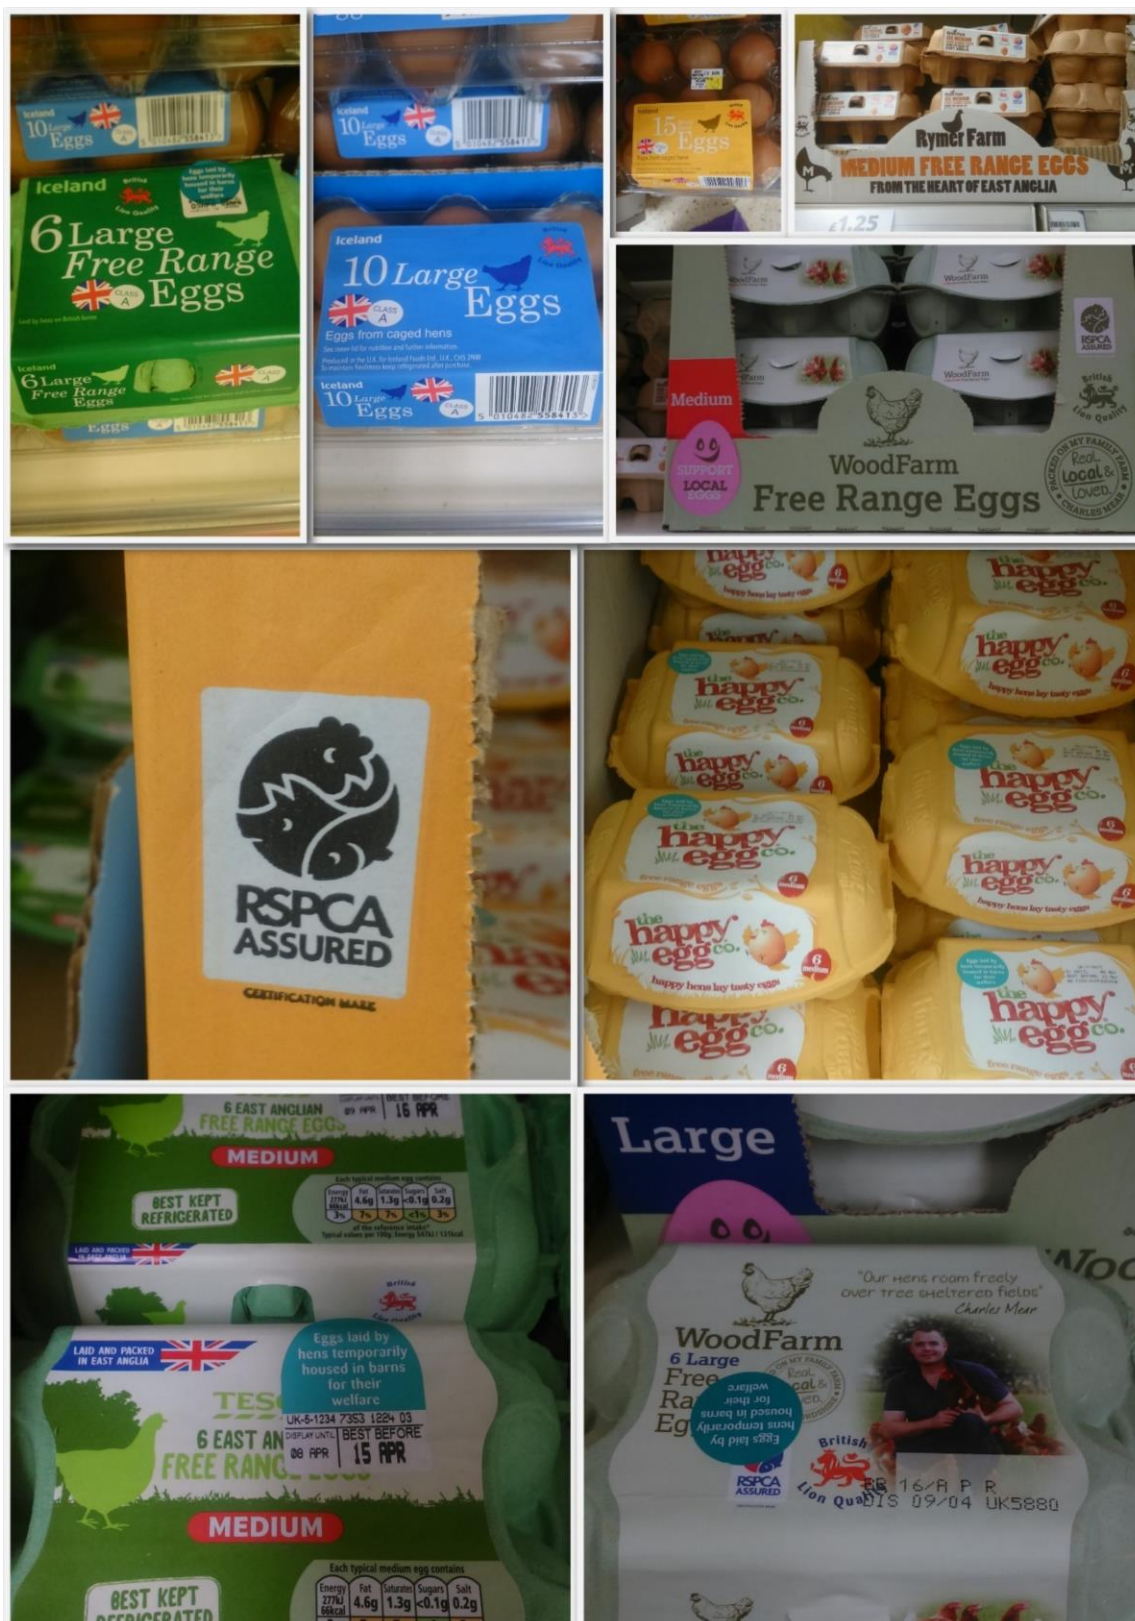

Figure S4. Examples of images from egg packages from UK.

## 1.5. Meat in Brazil

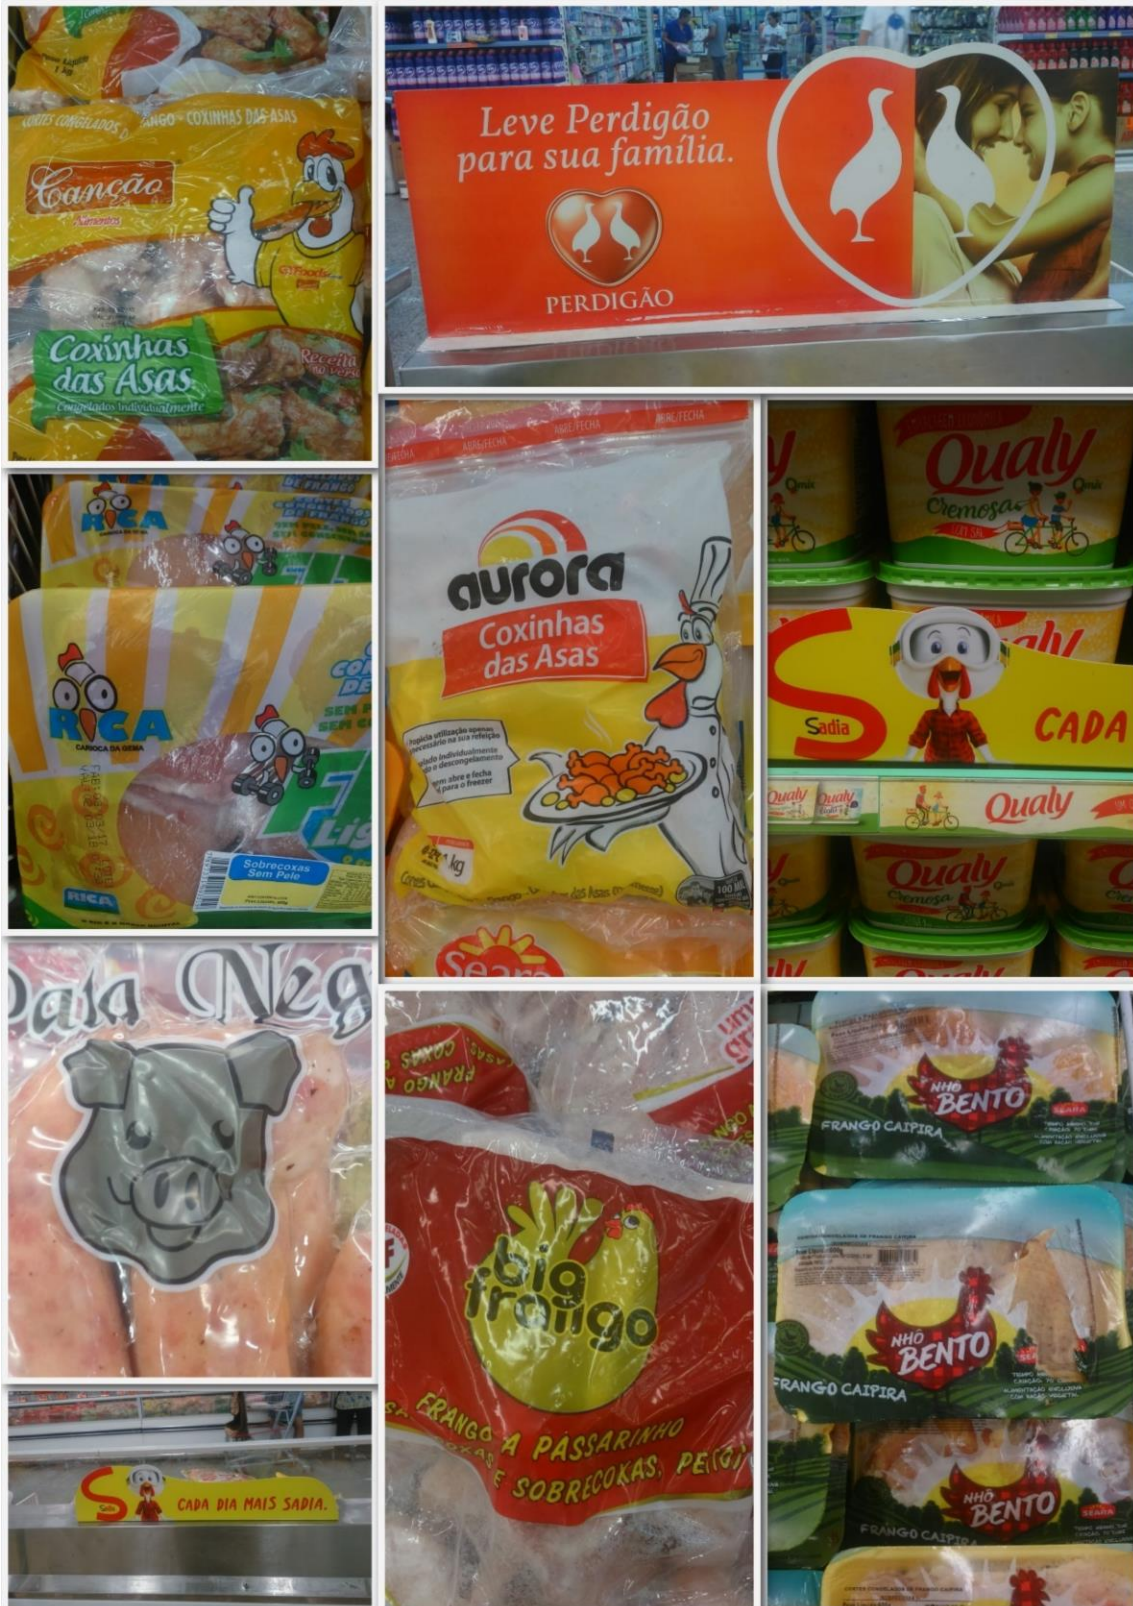

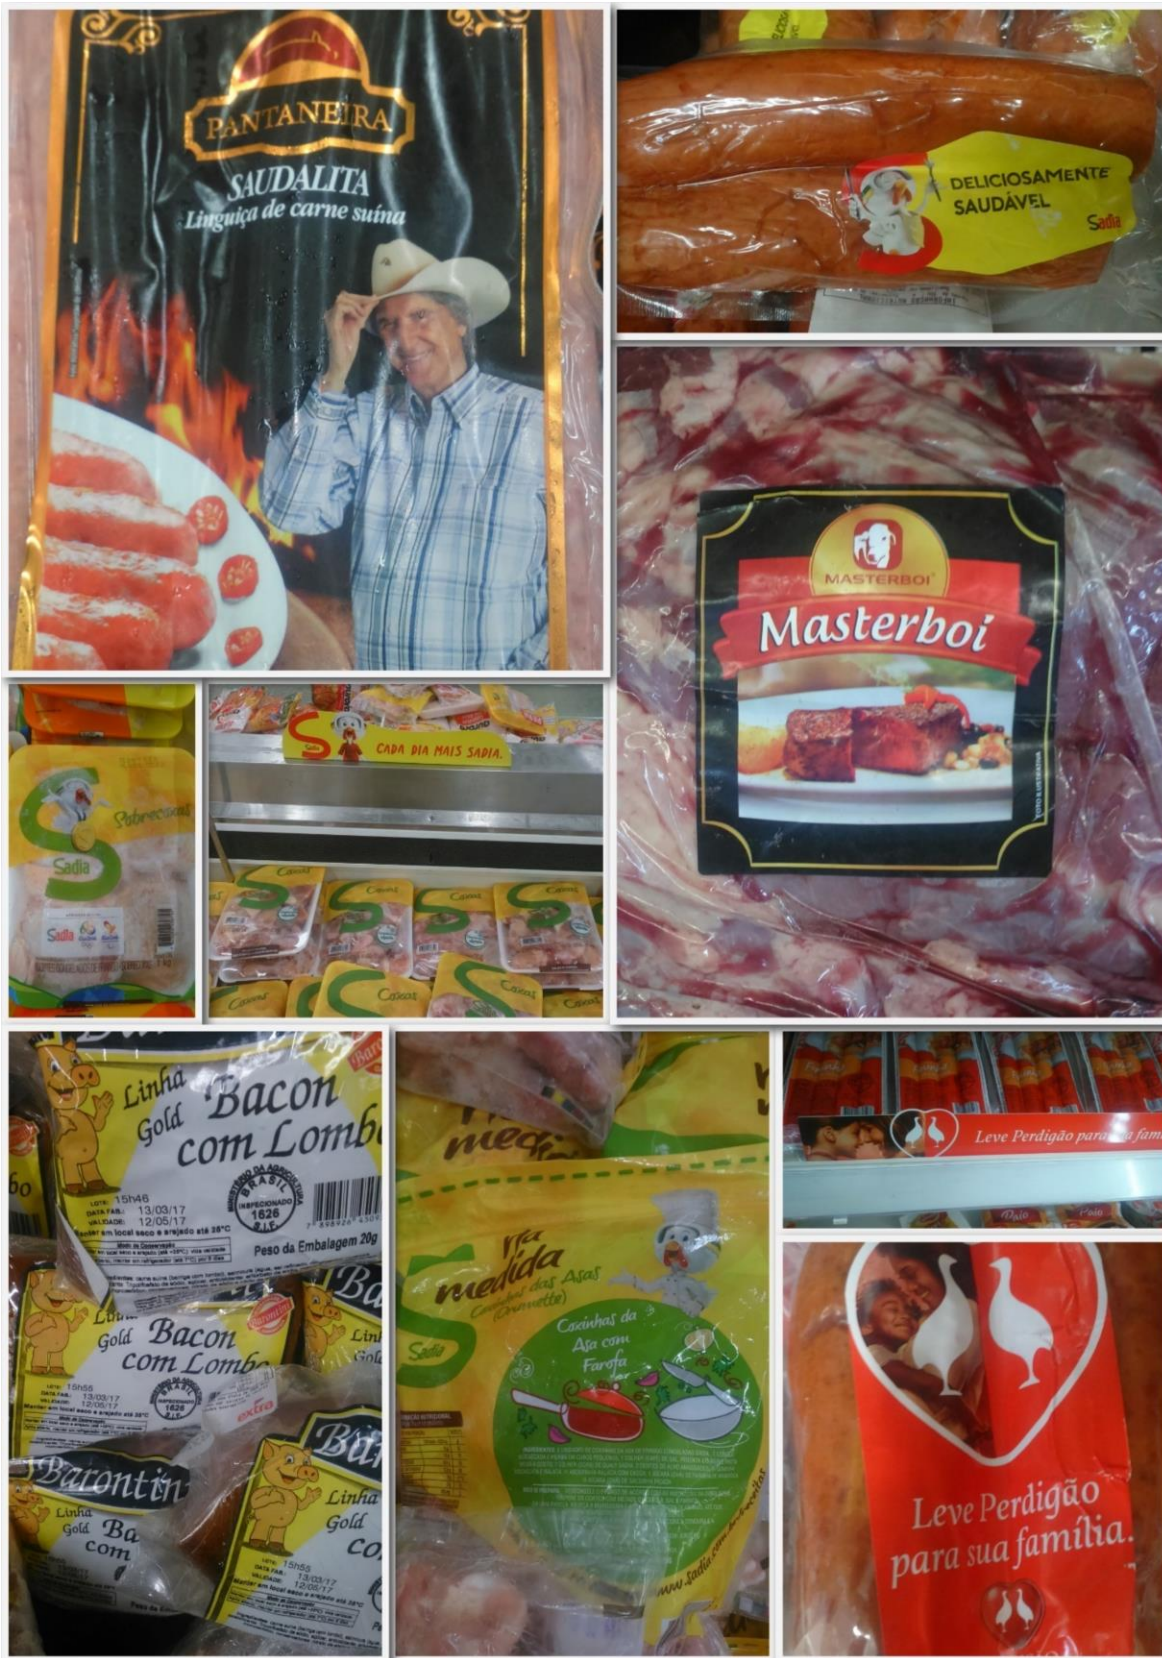

Figure S5. Examples of images from meat packages from Brazil.

## 1.6. Meat in UK

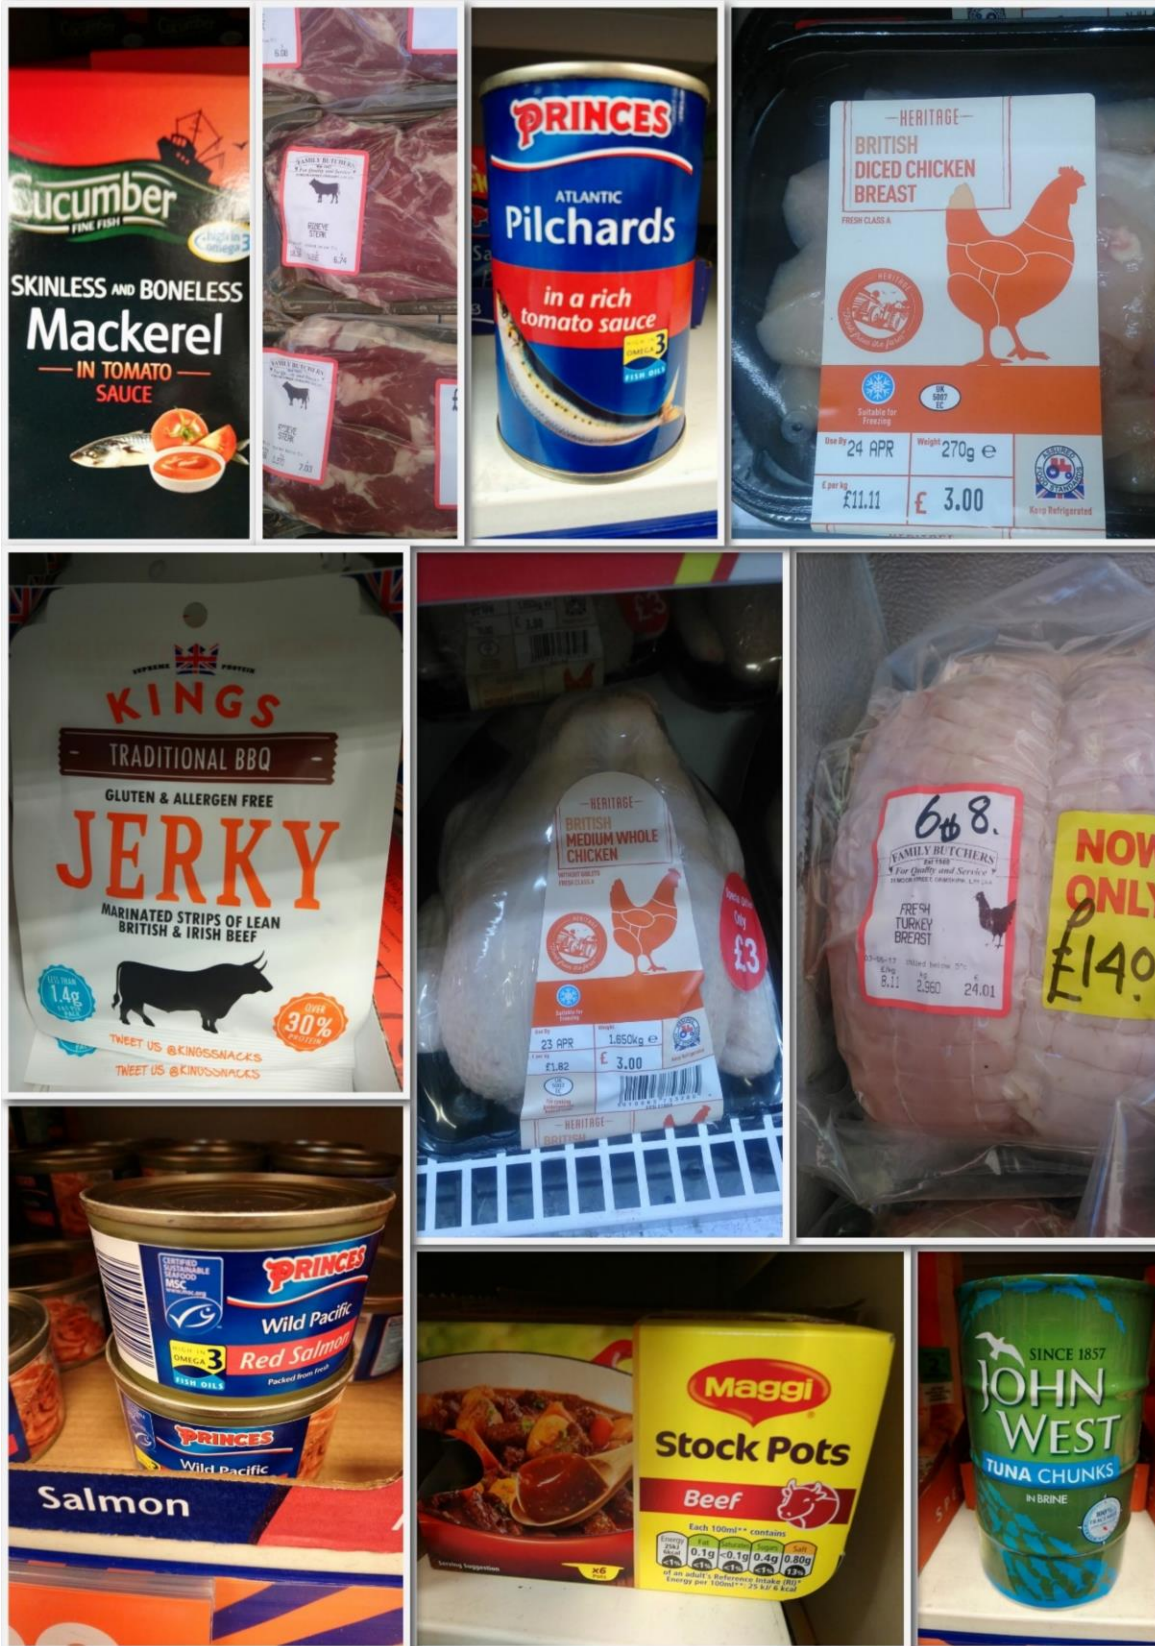

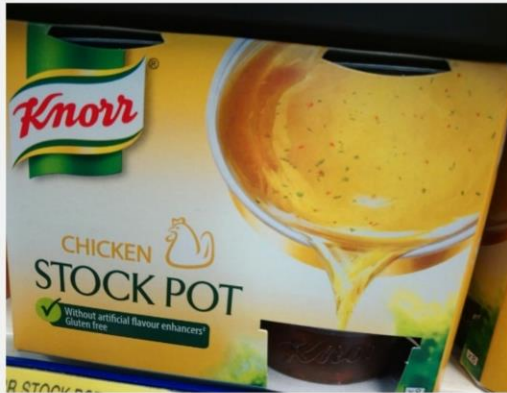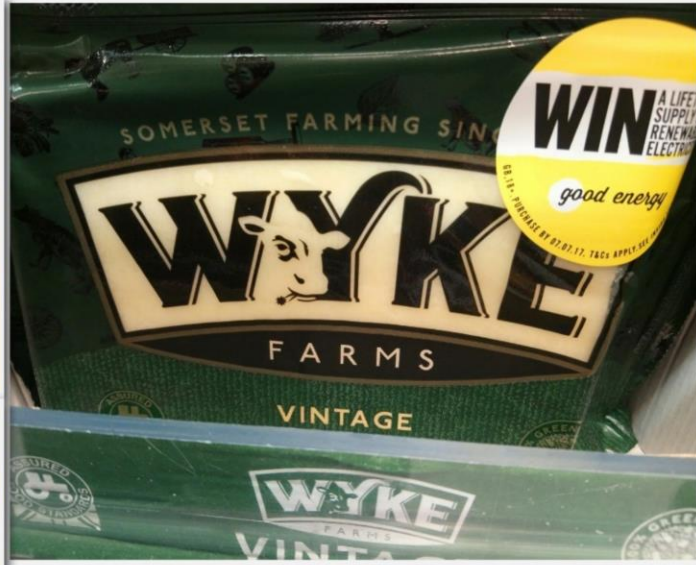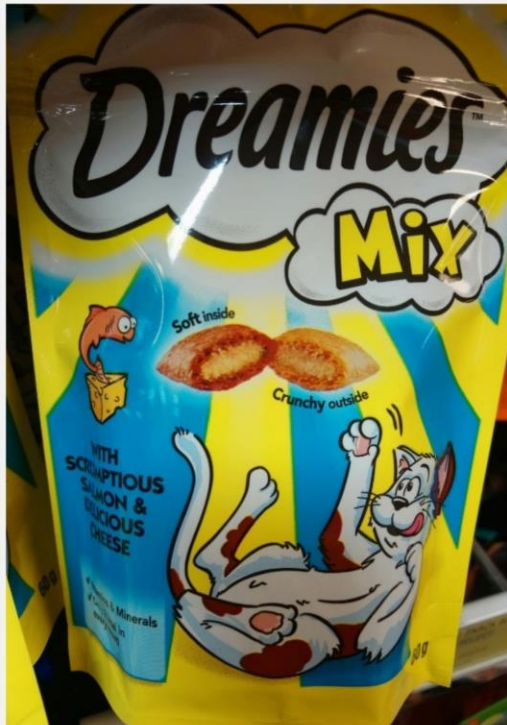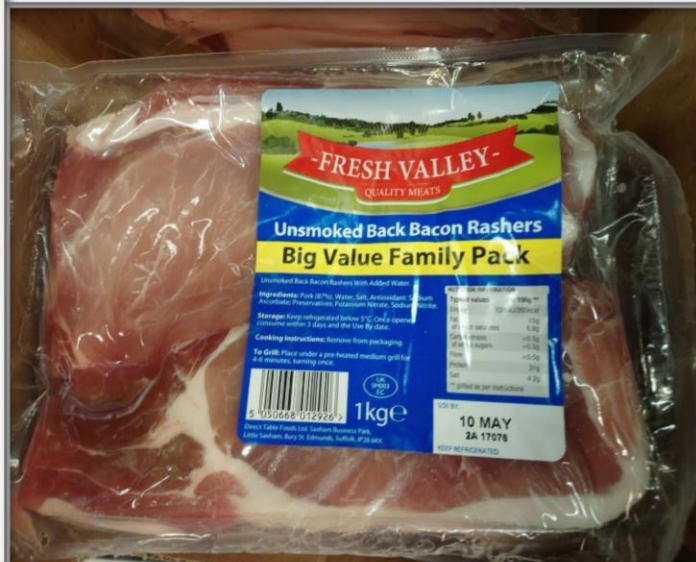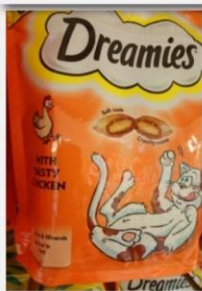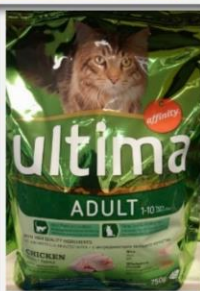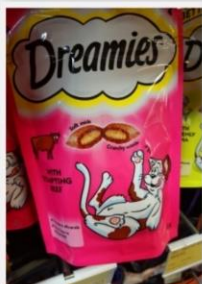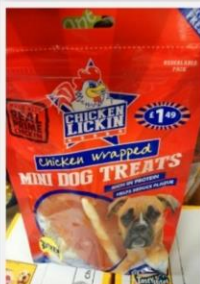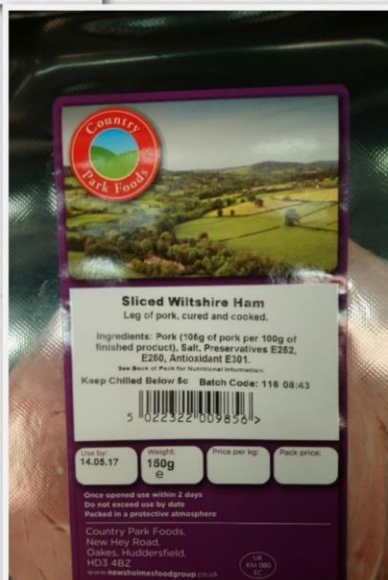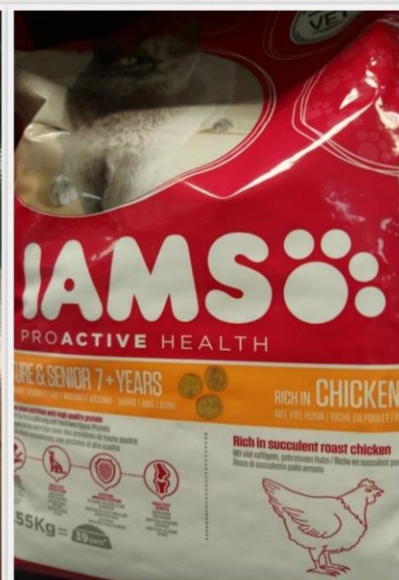

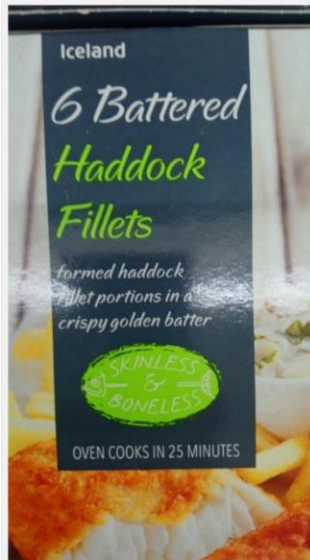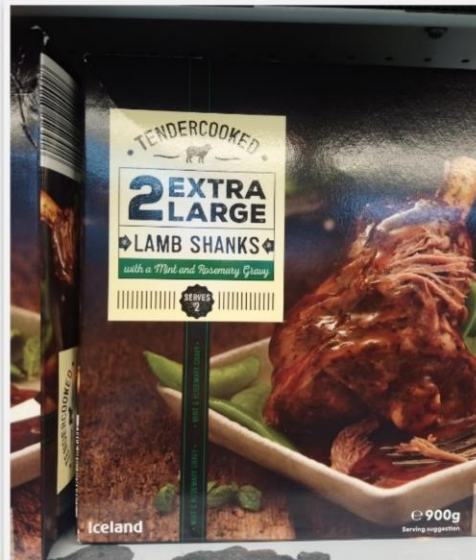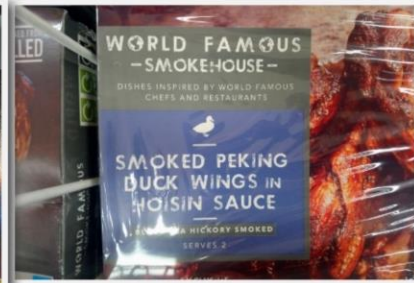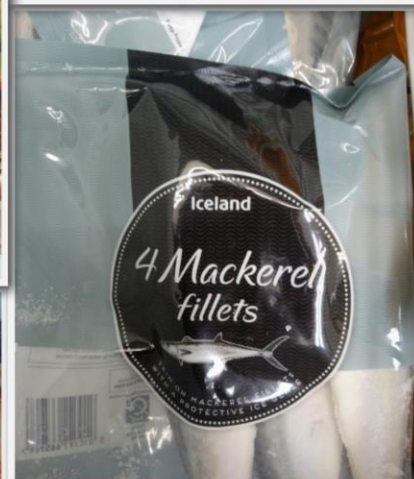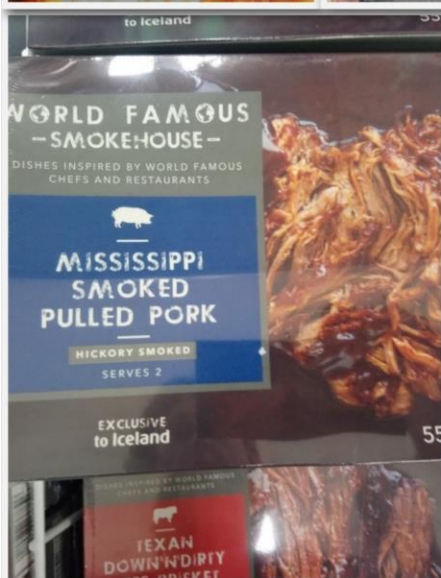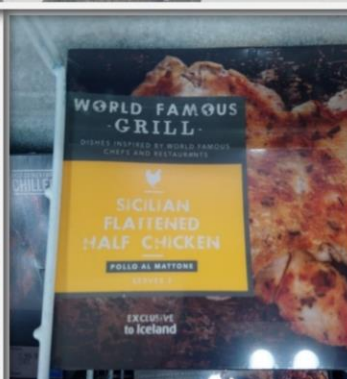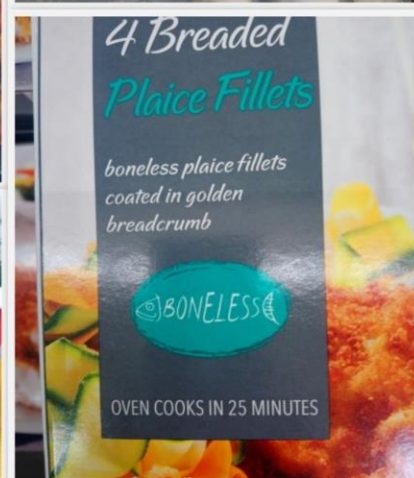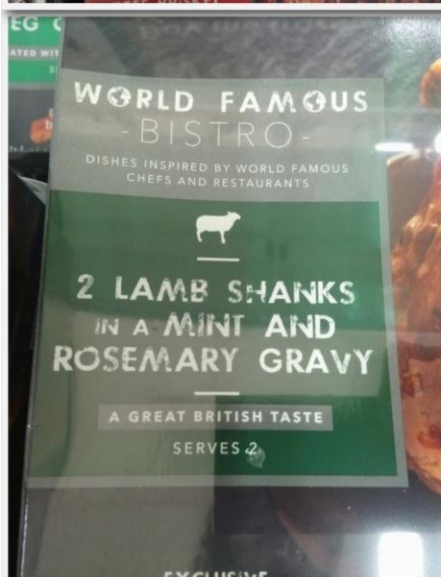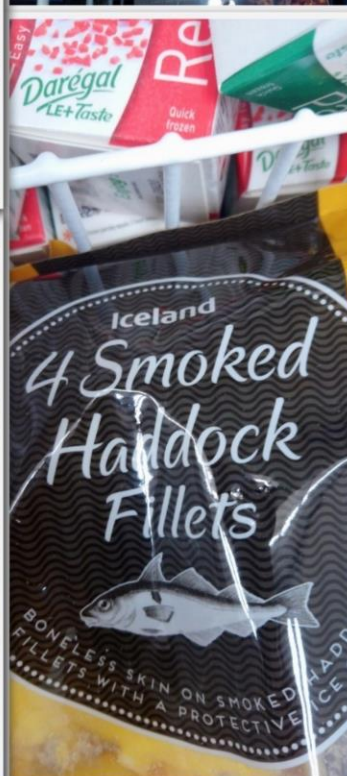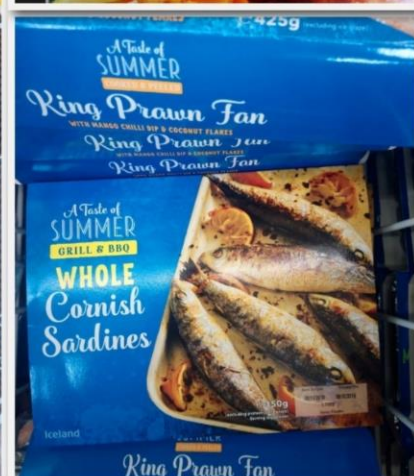

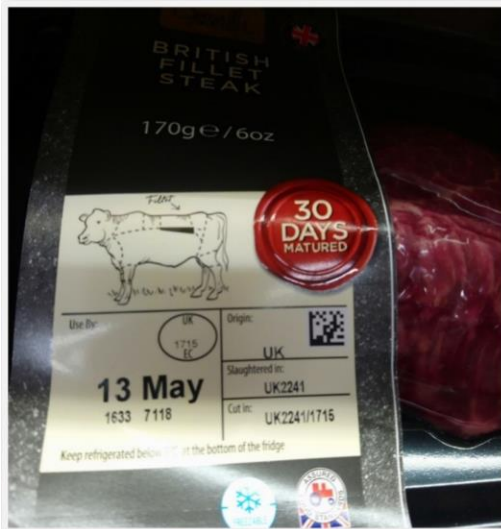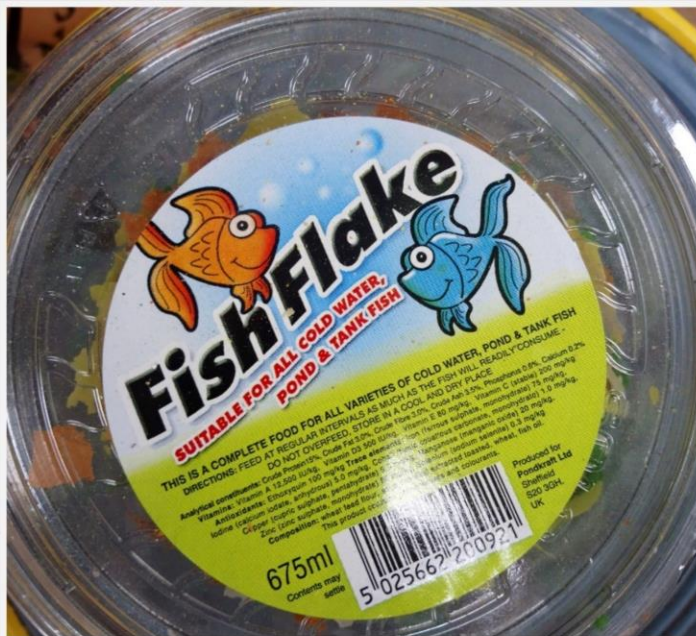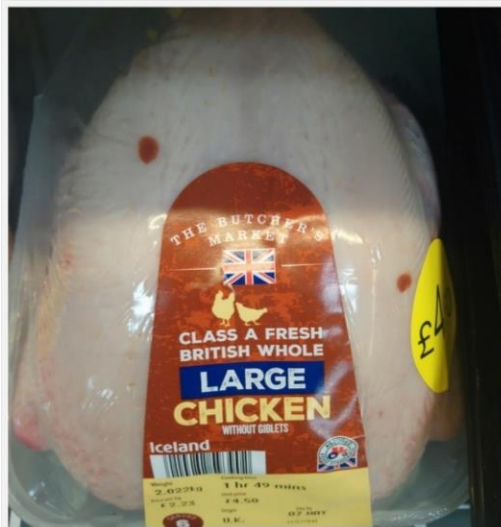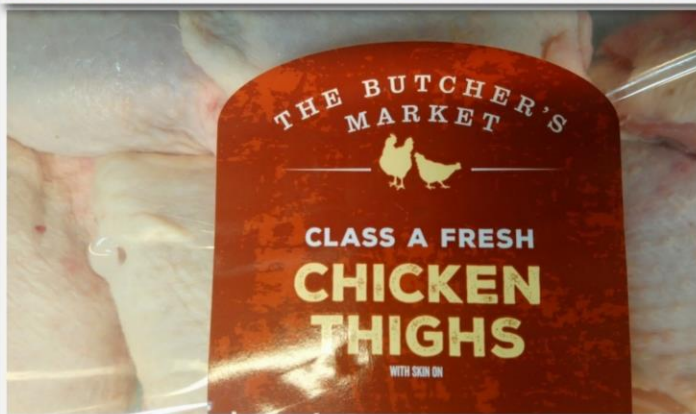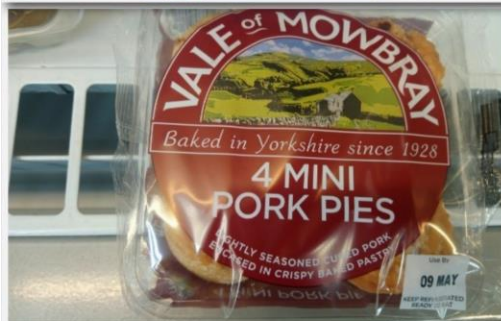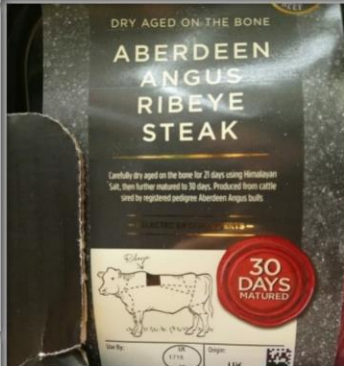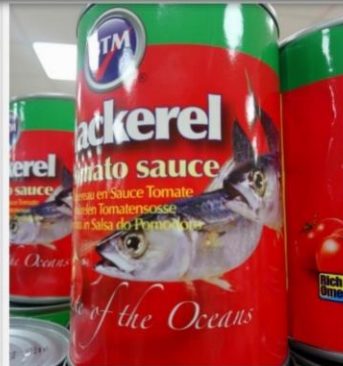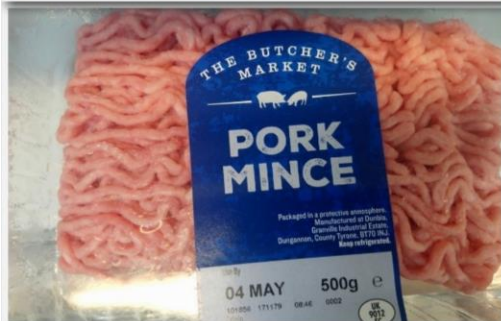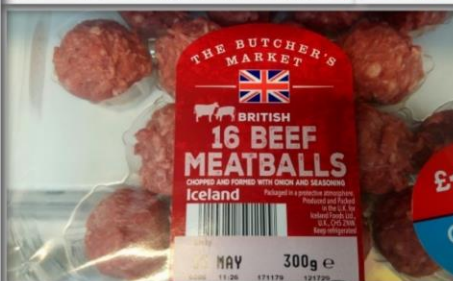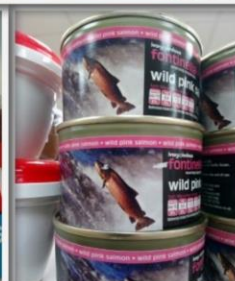

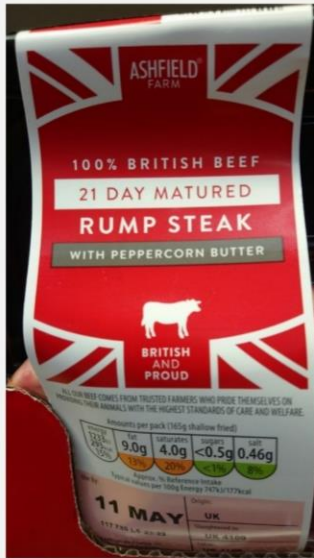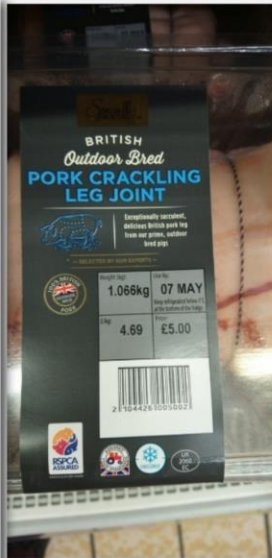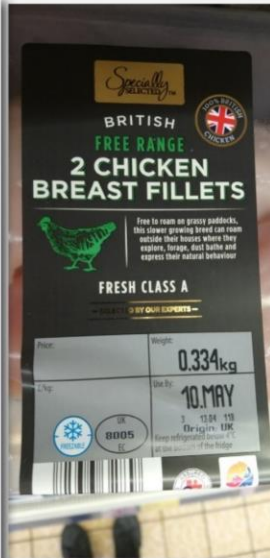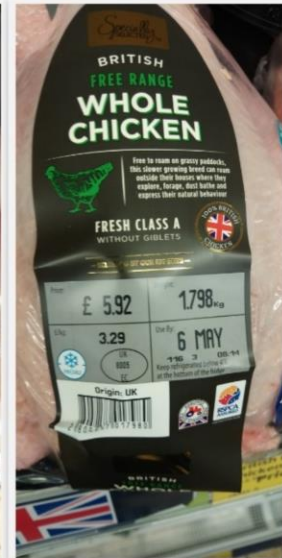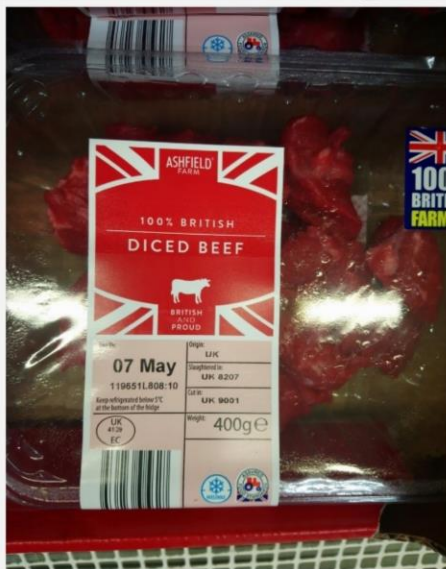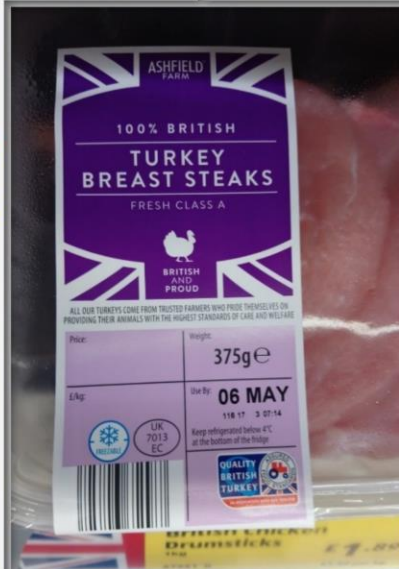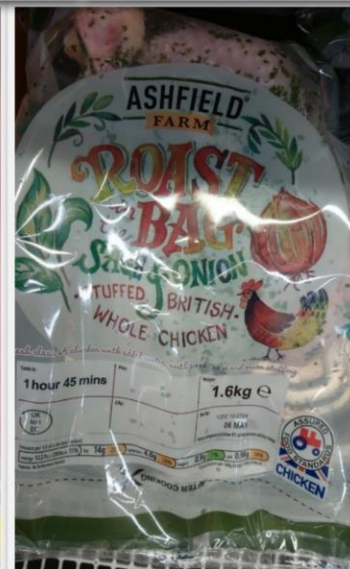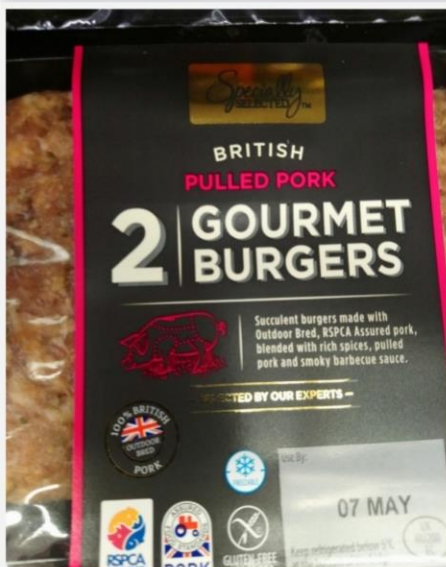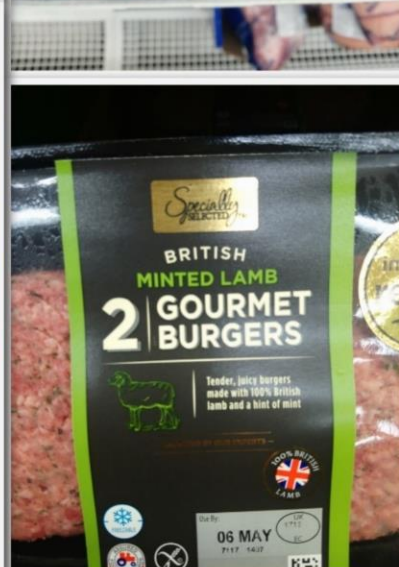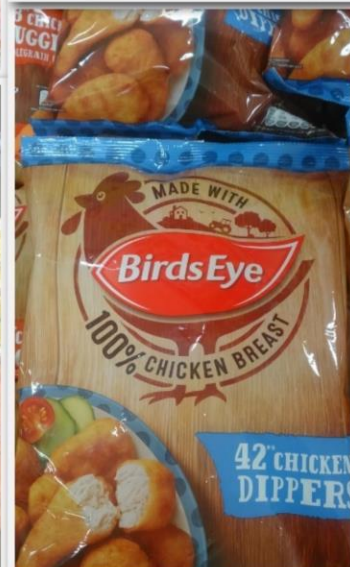

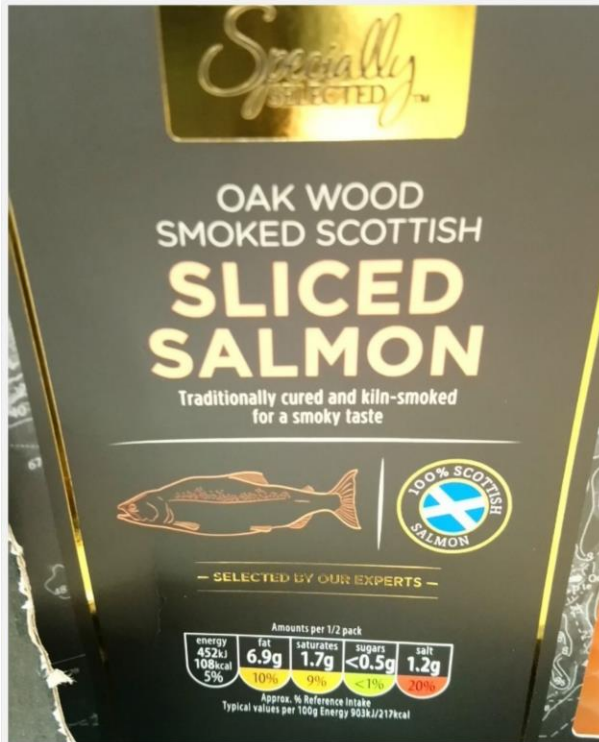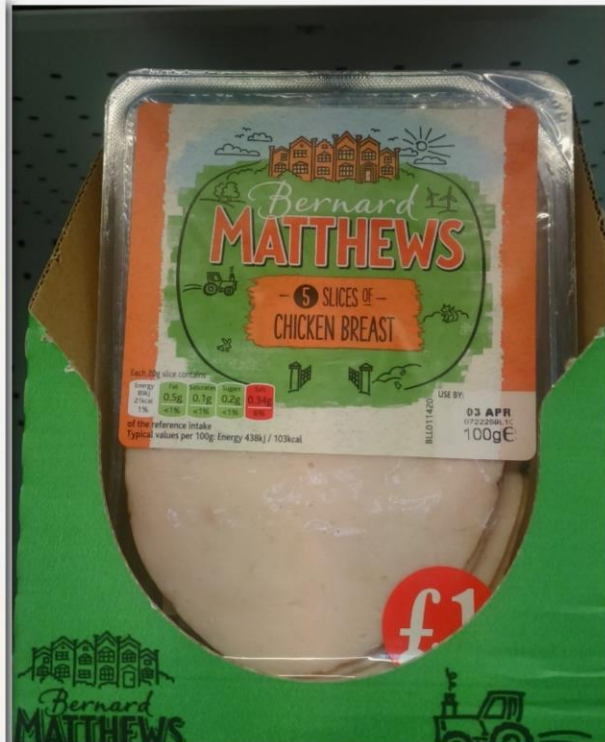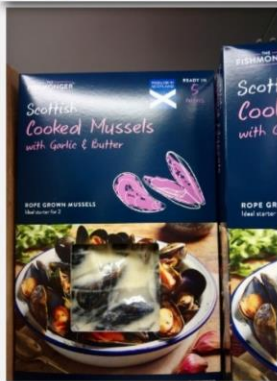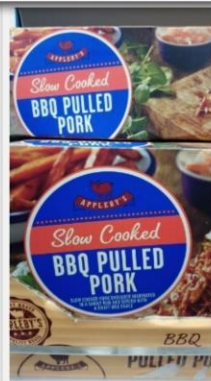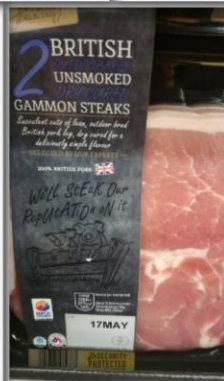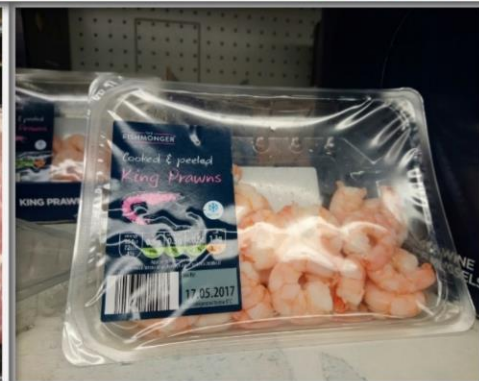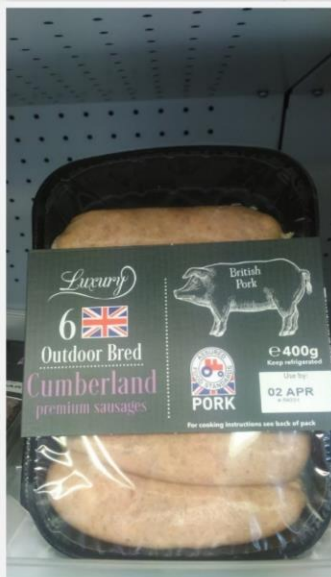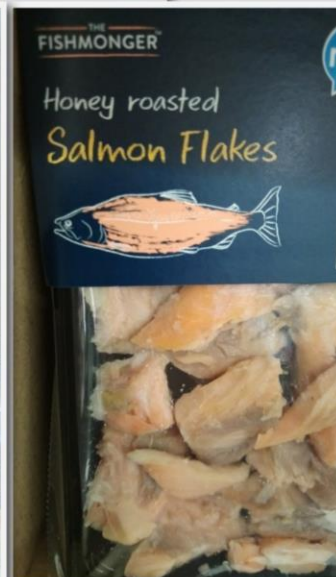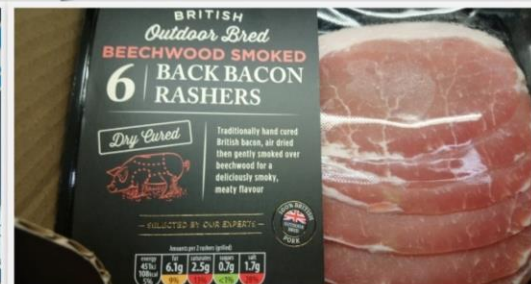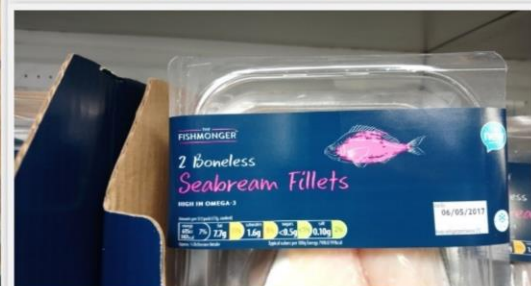

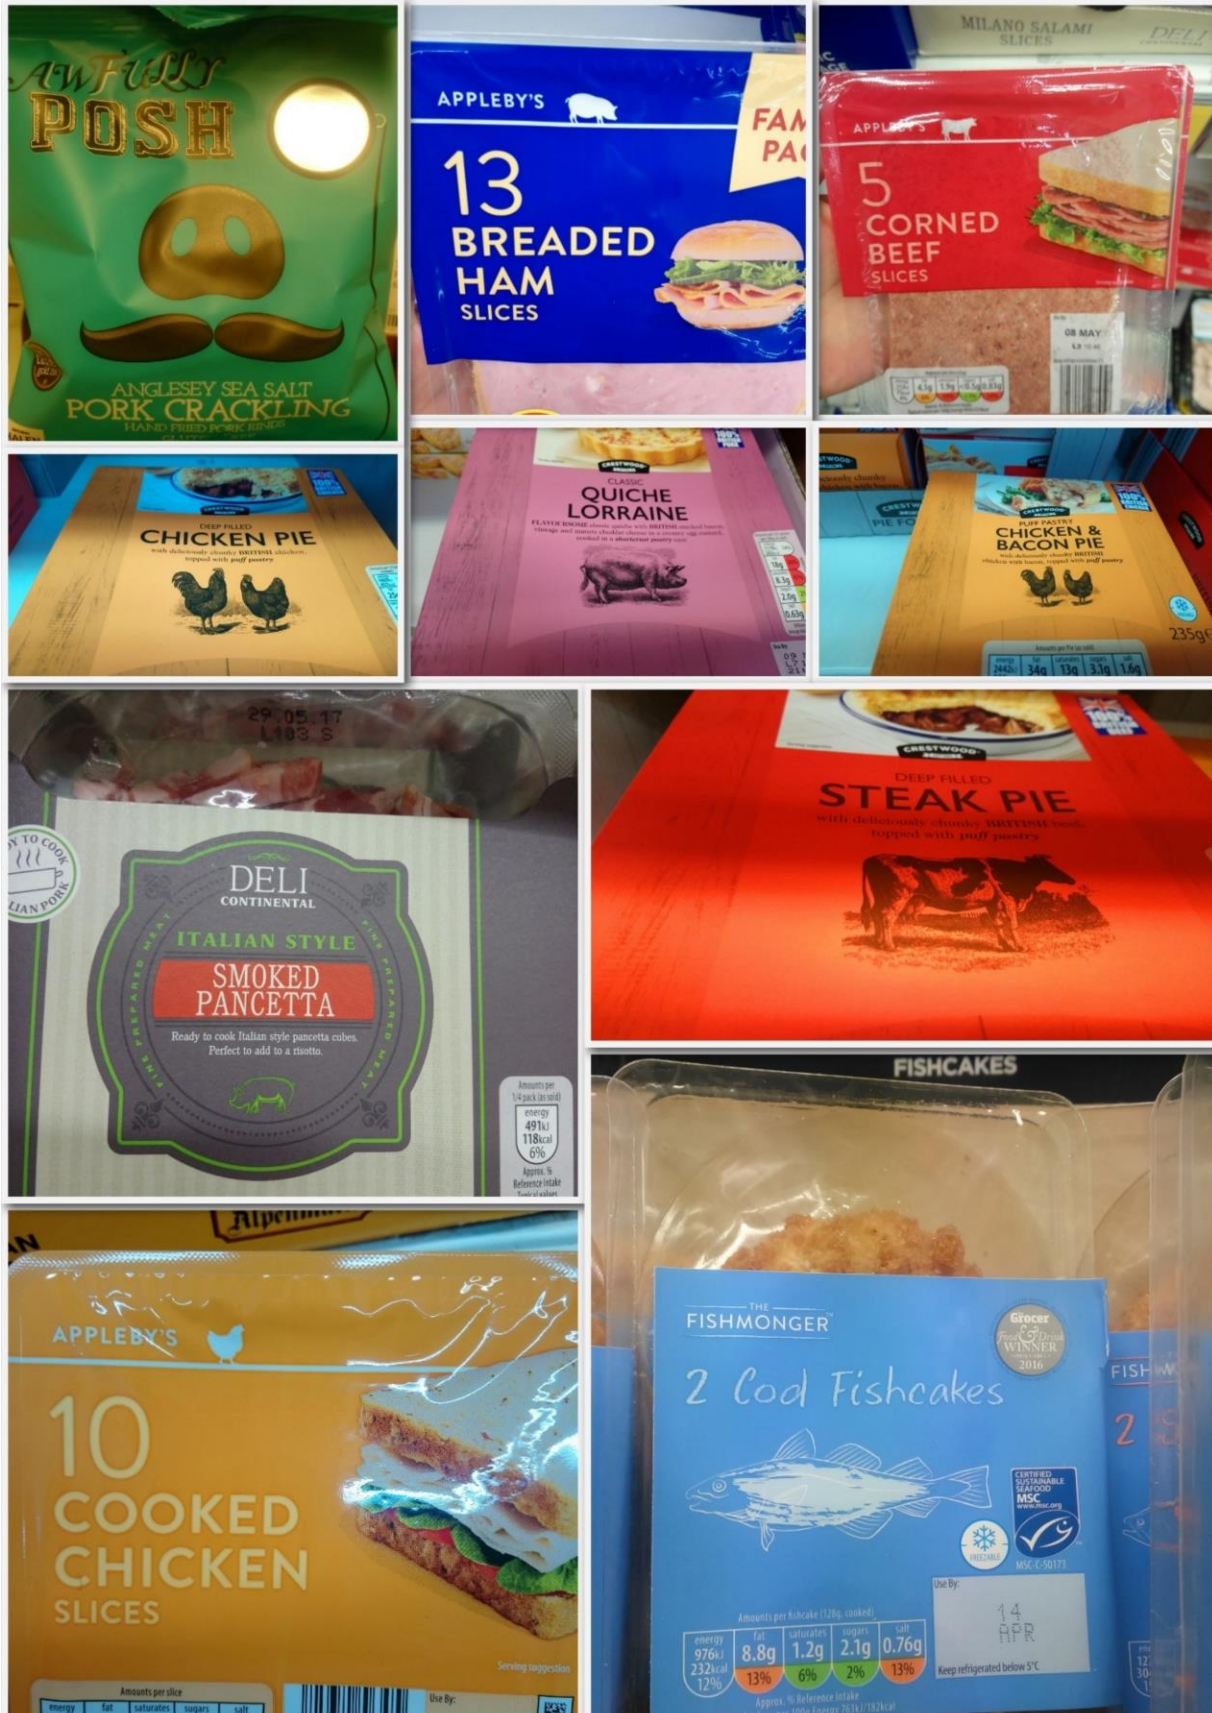

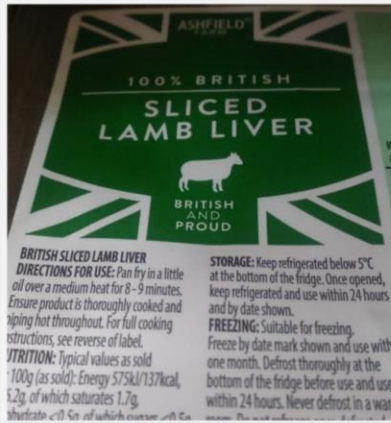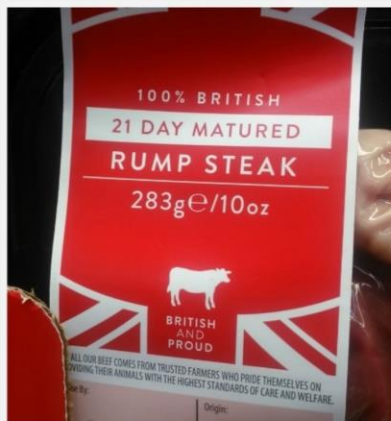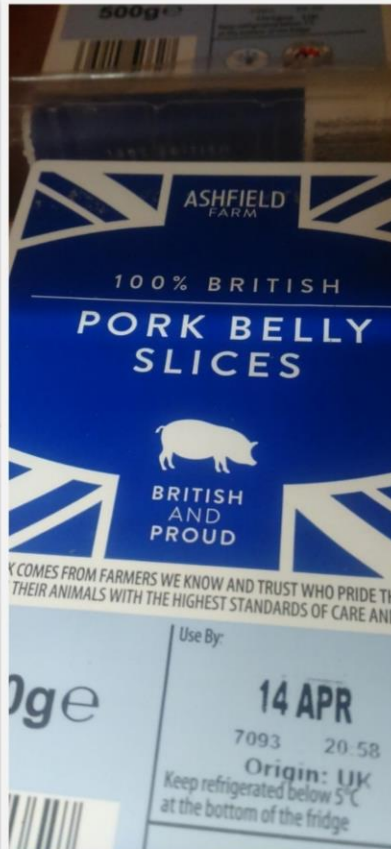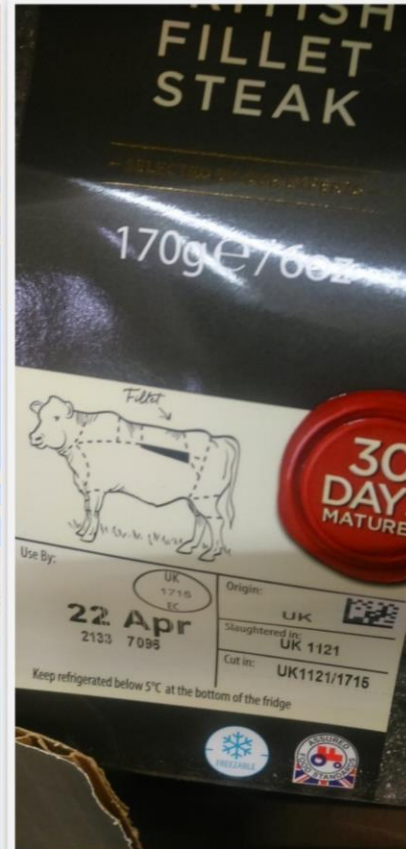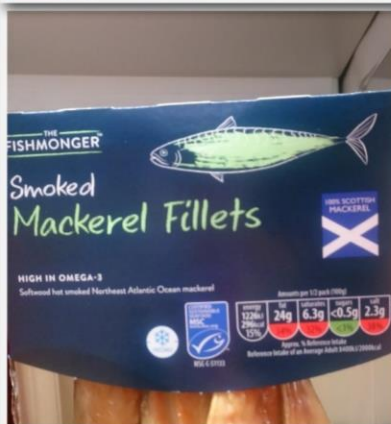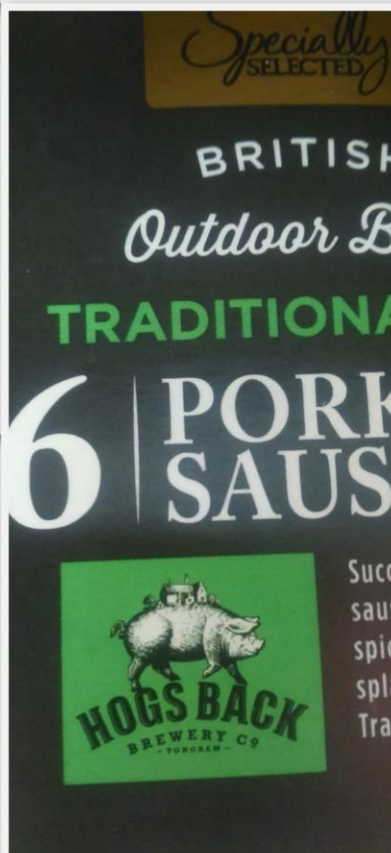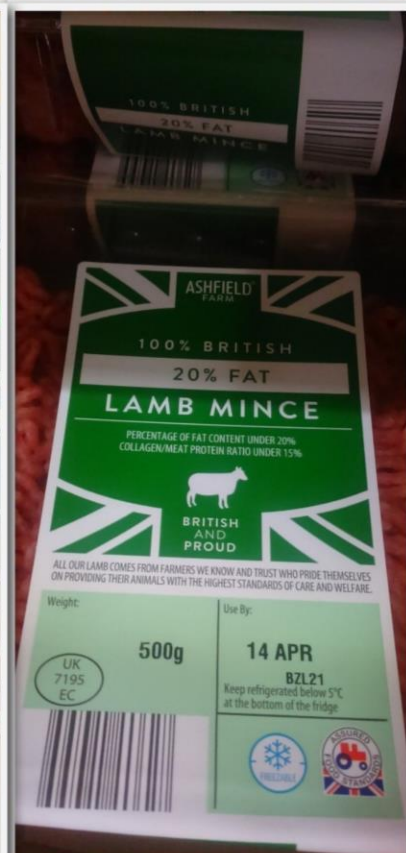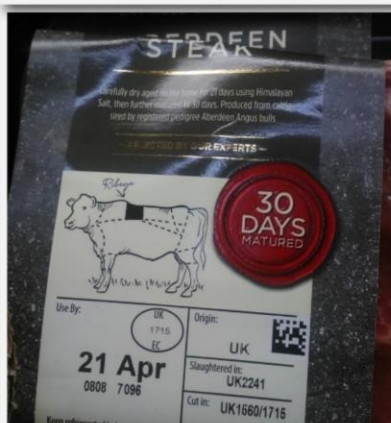

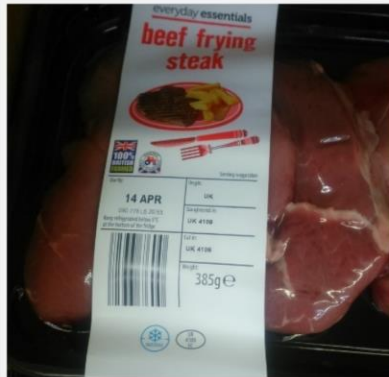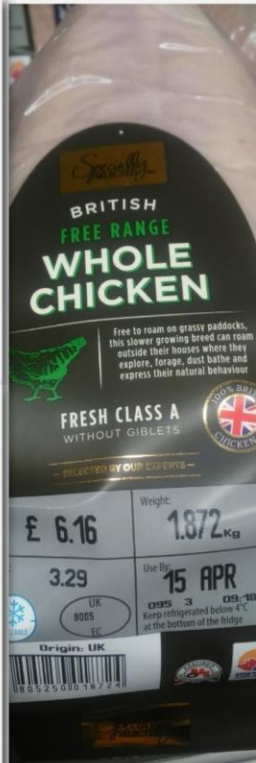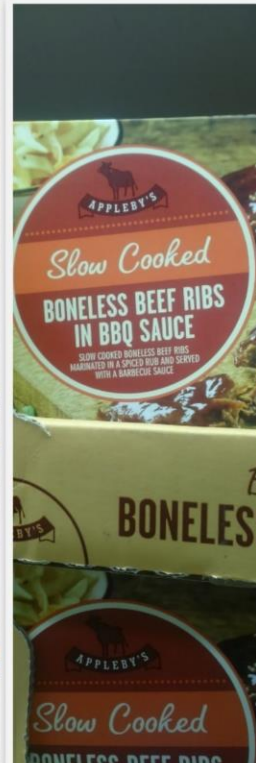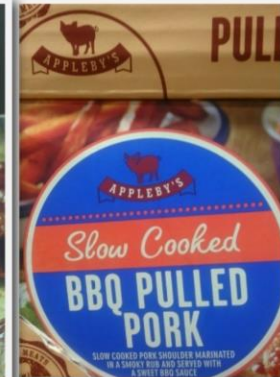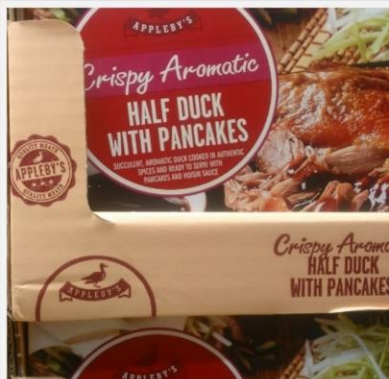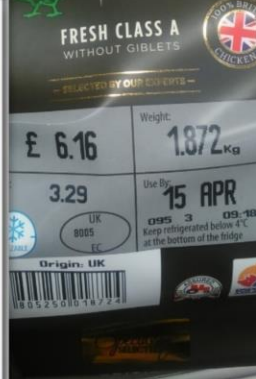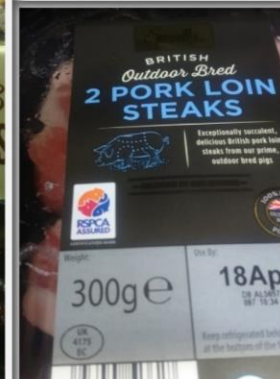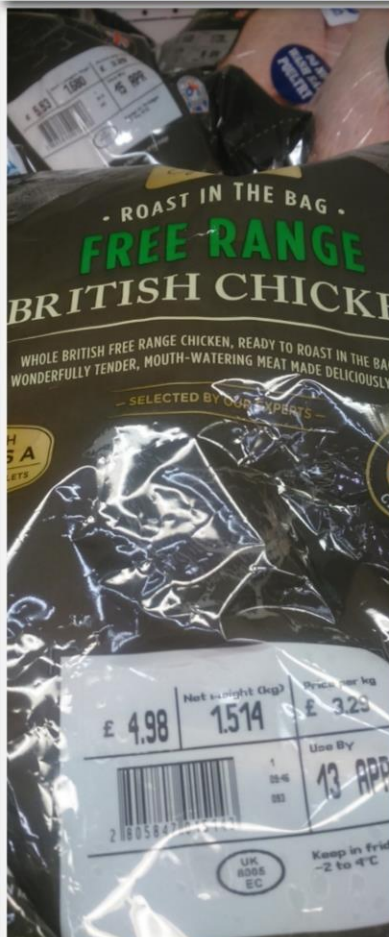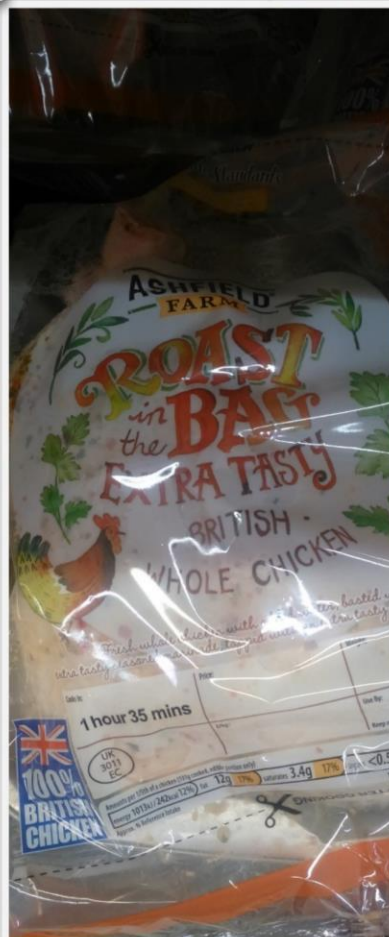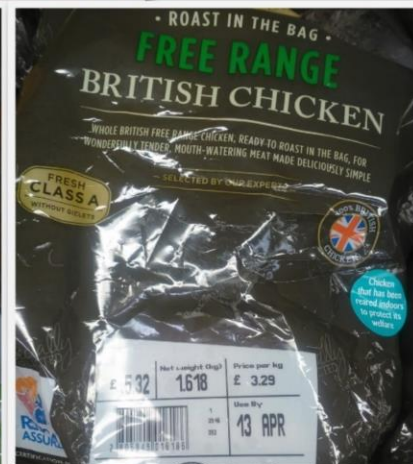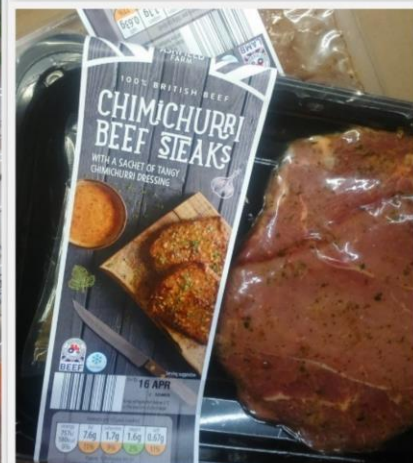

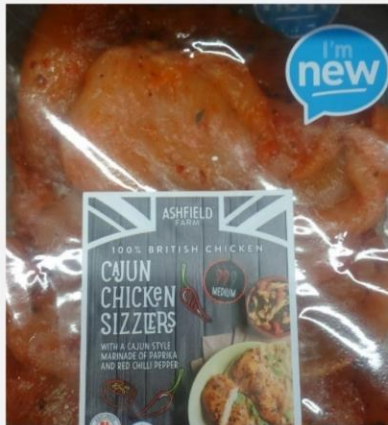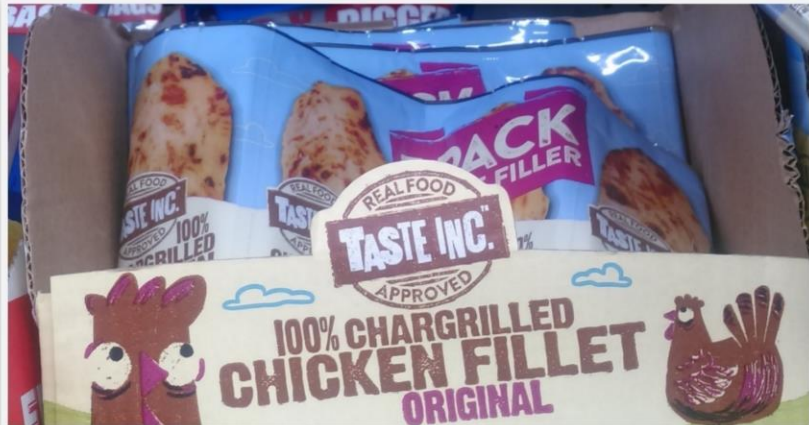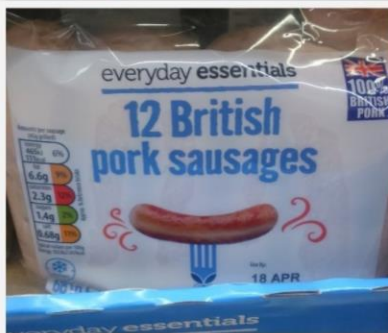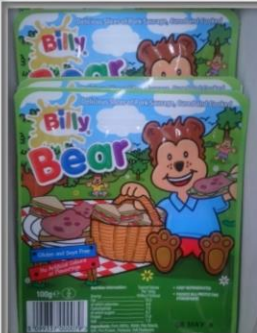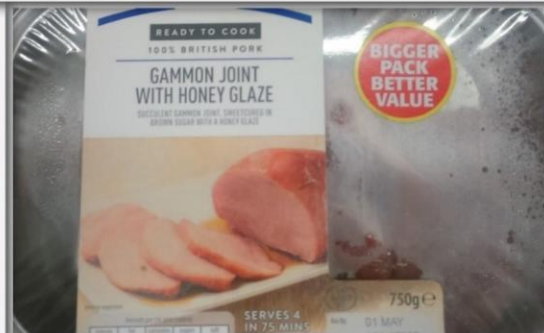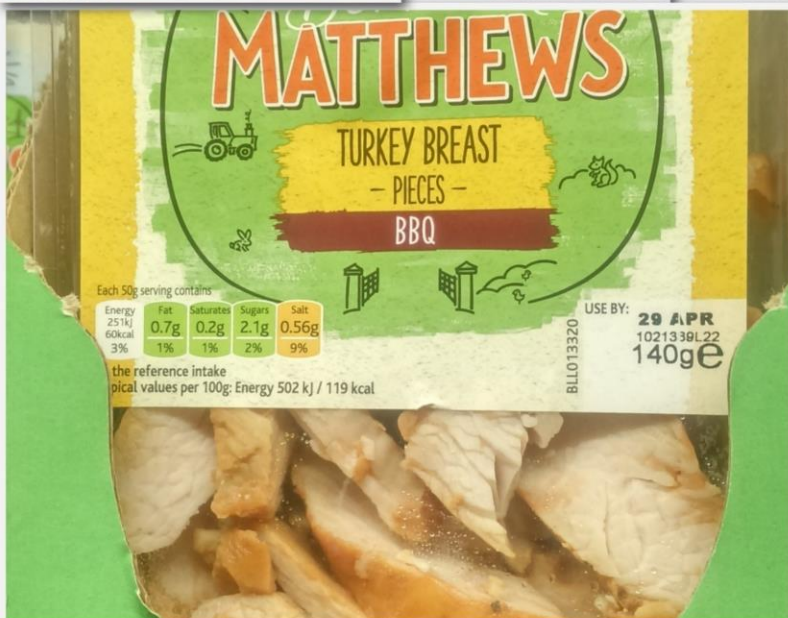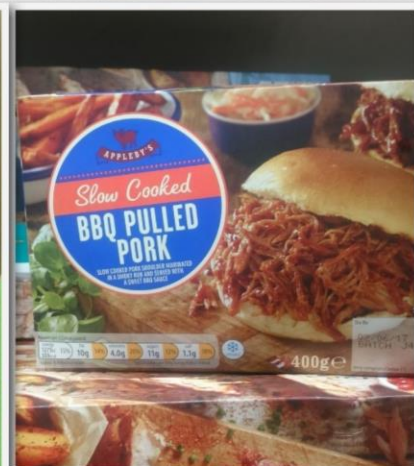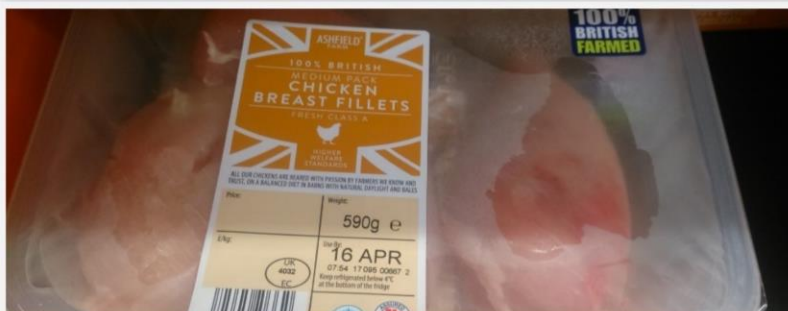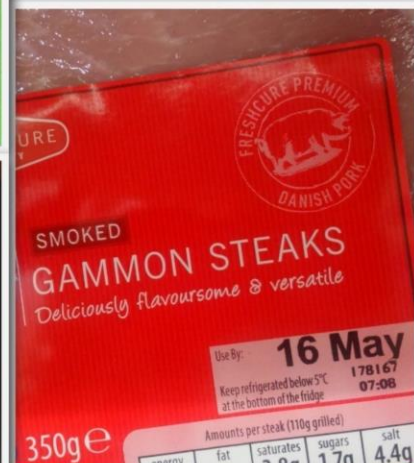

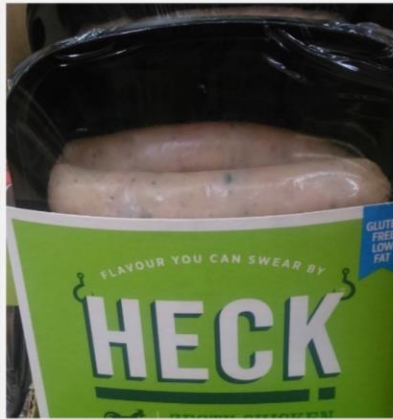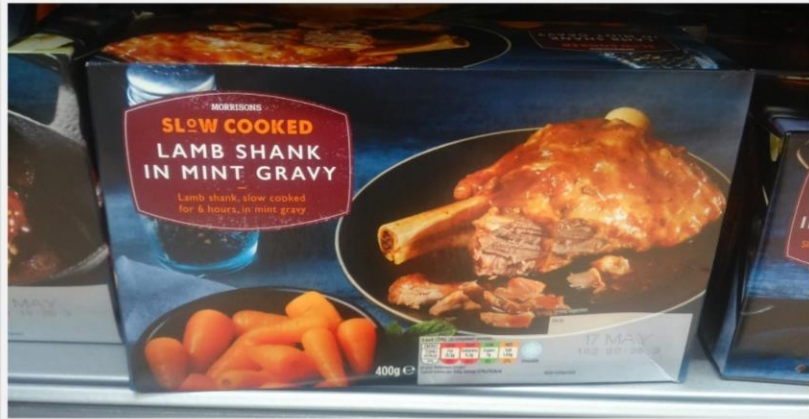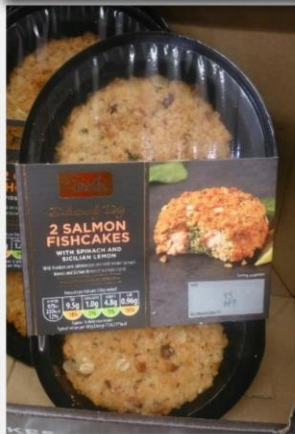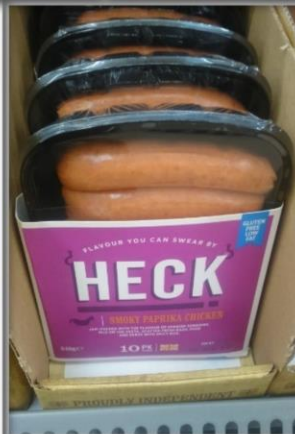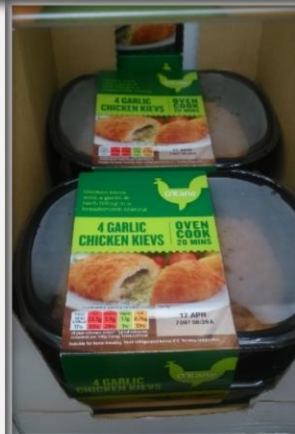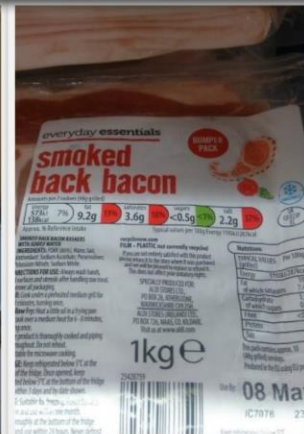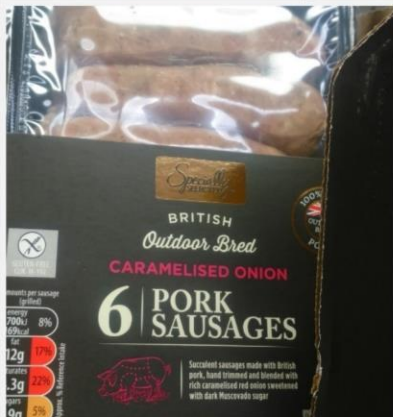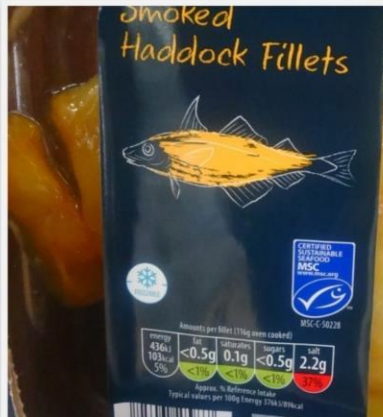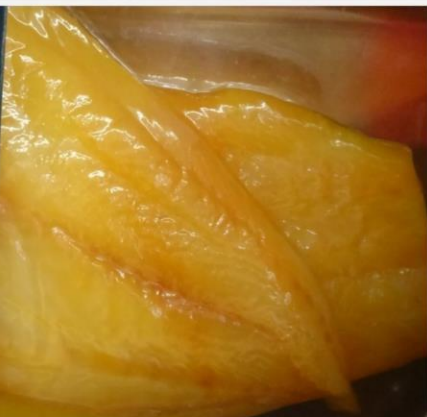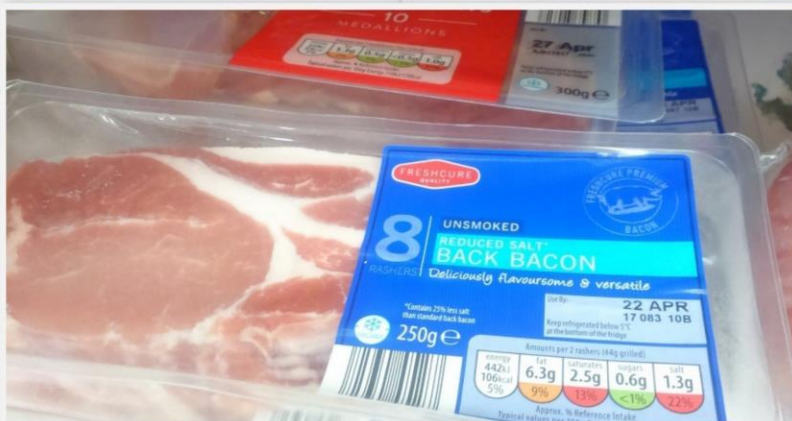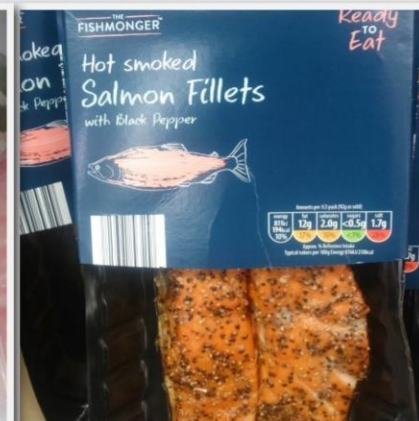

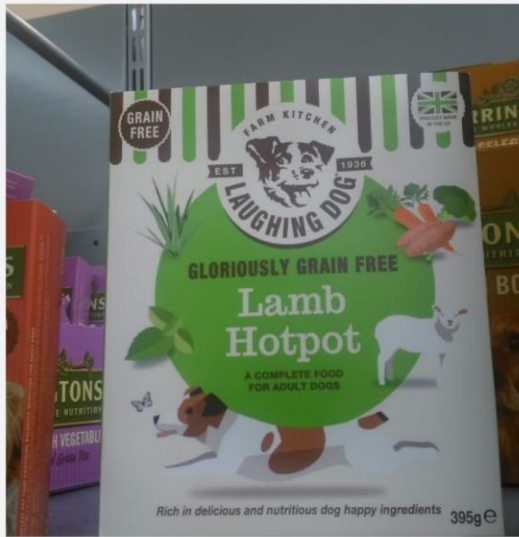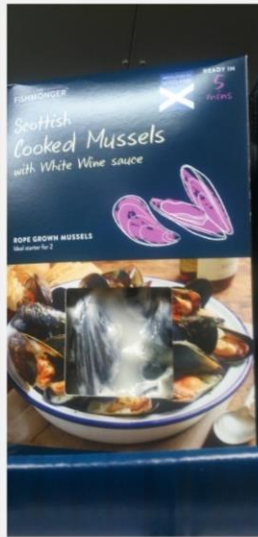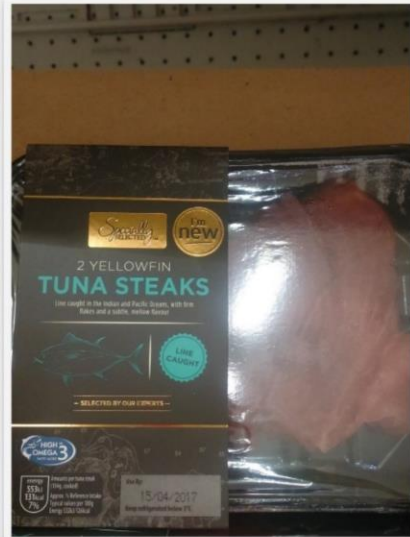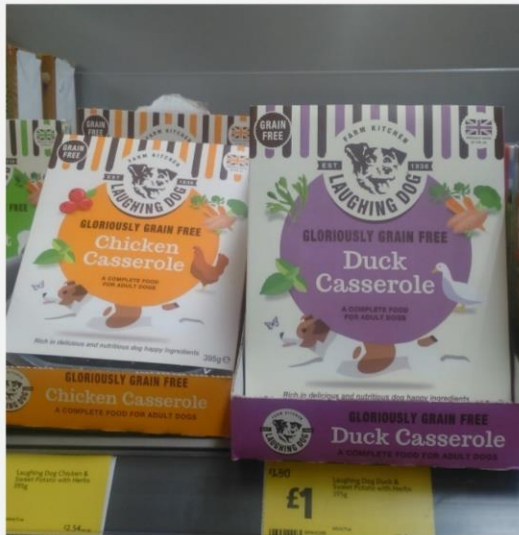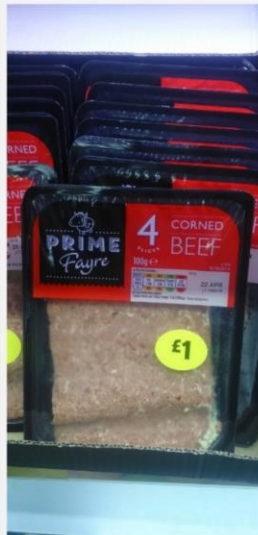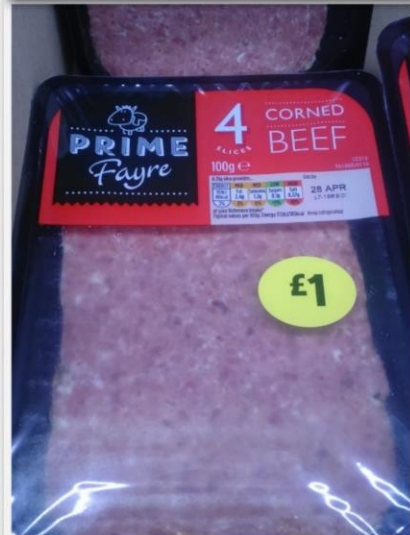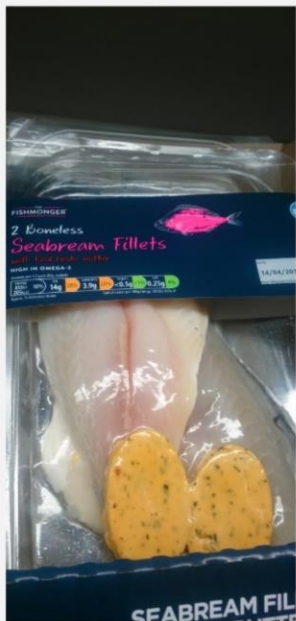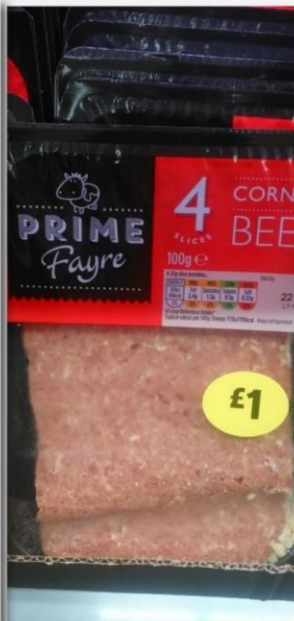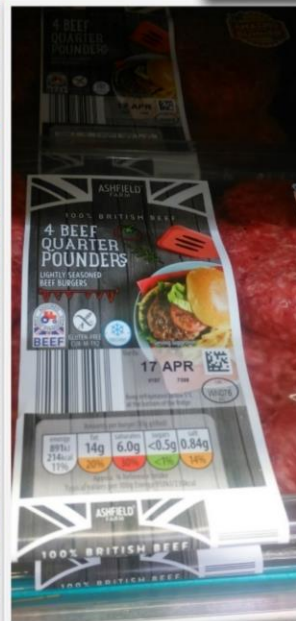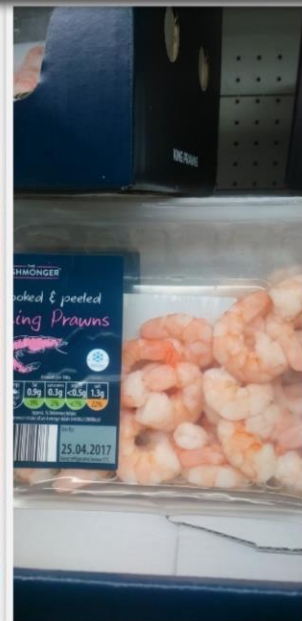

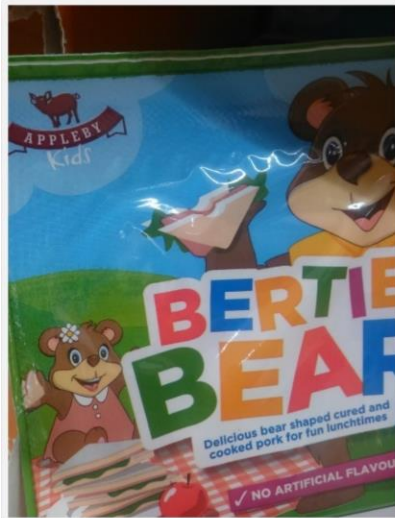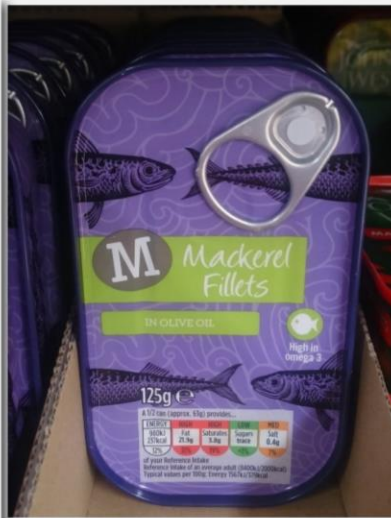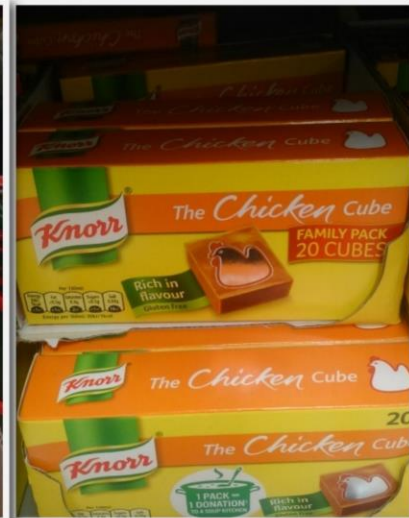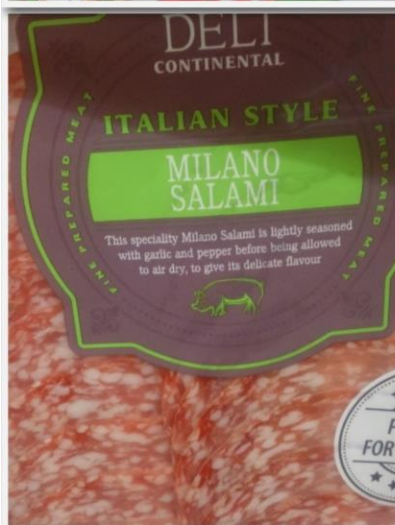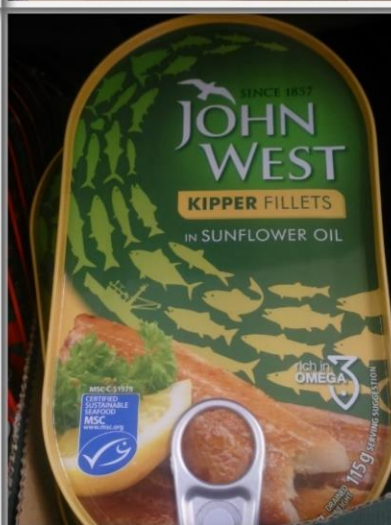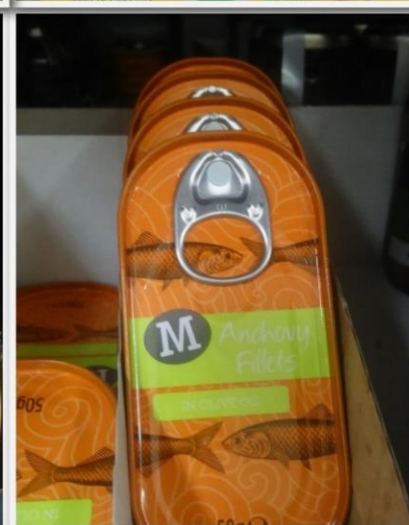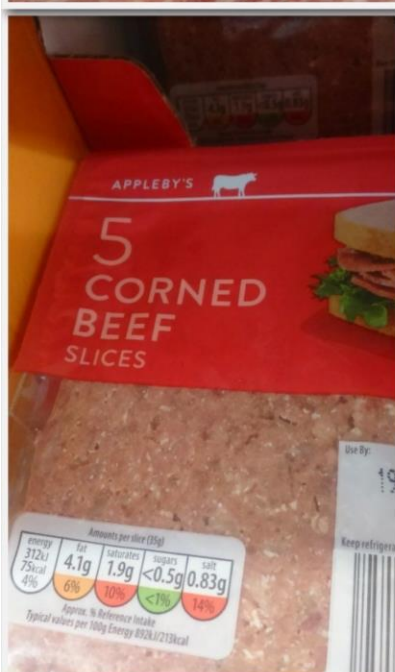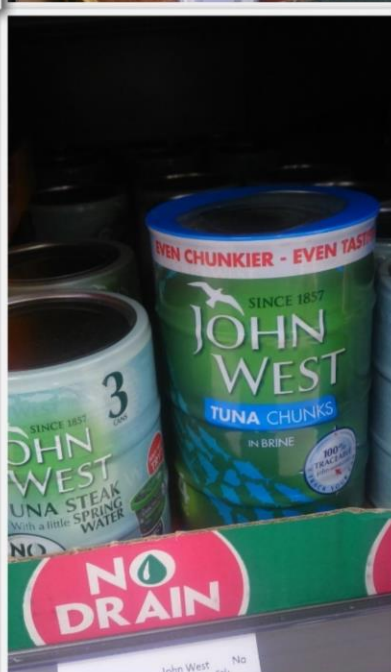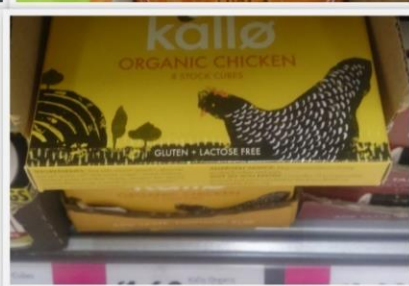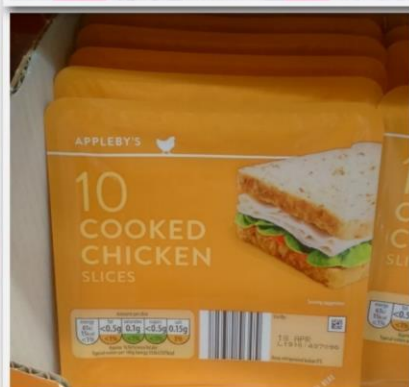

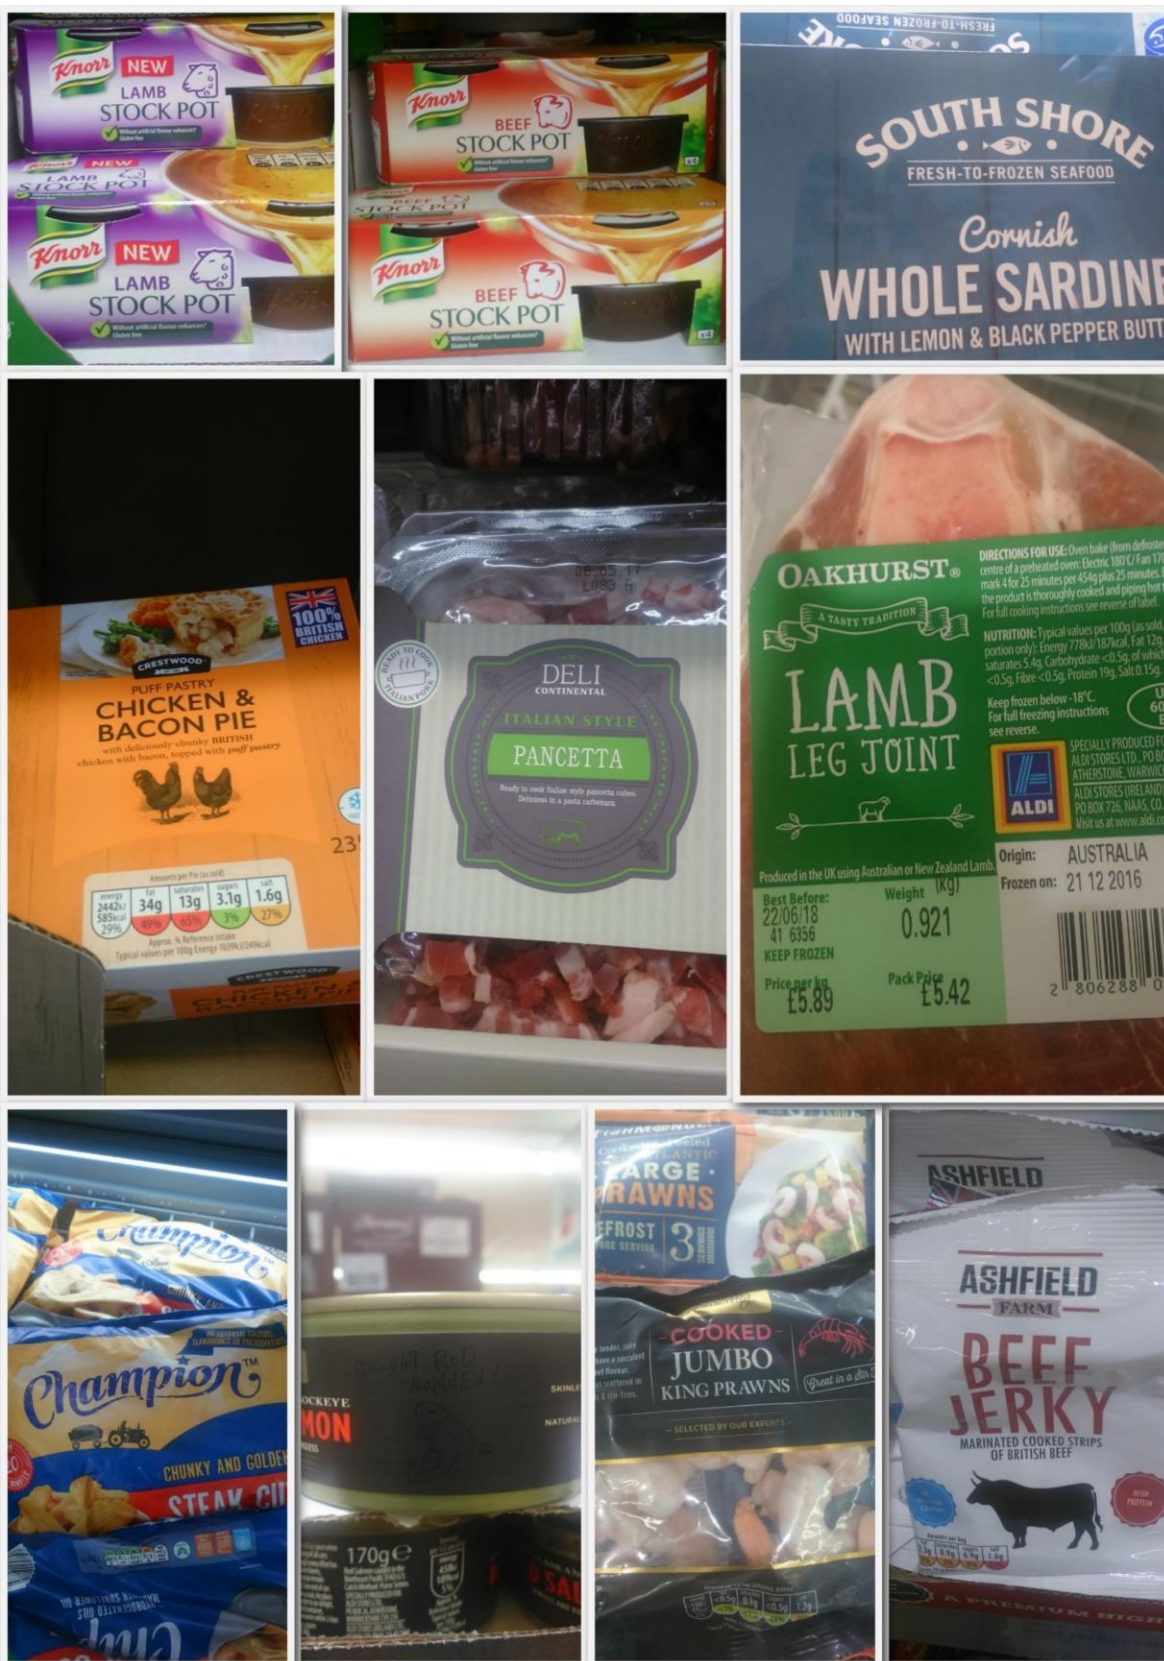

Figure S6. Examples of images from meat packages from UK.

## 2. Data Collection imagery

### 2.1. Brazil: Carrefour

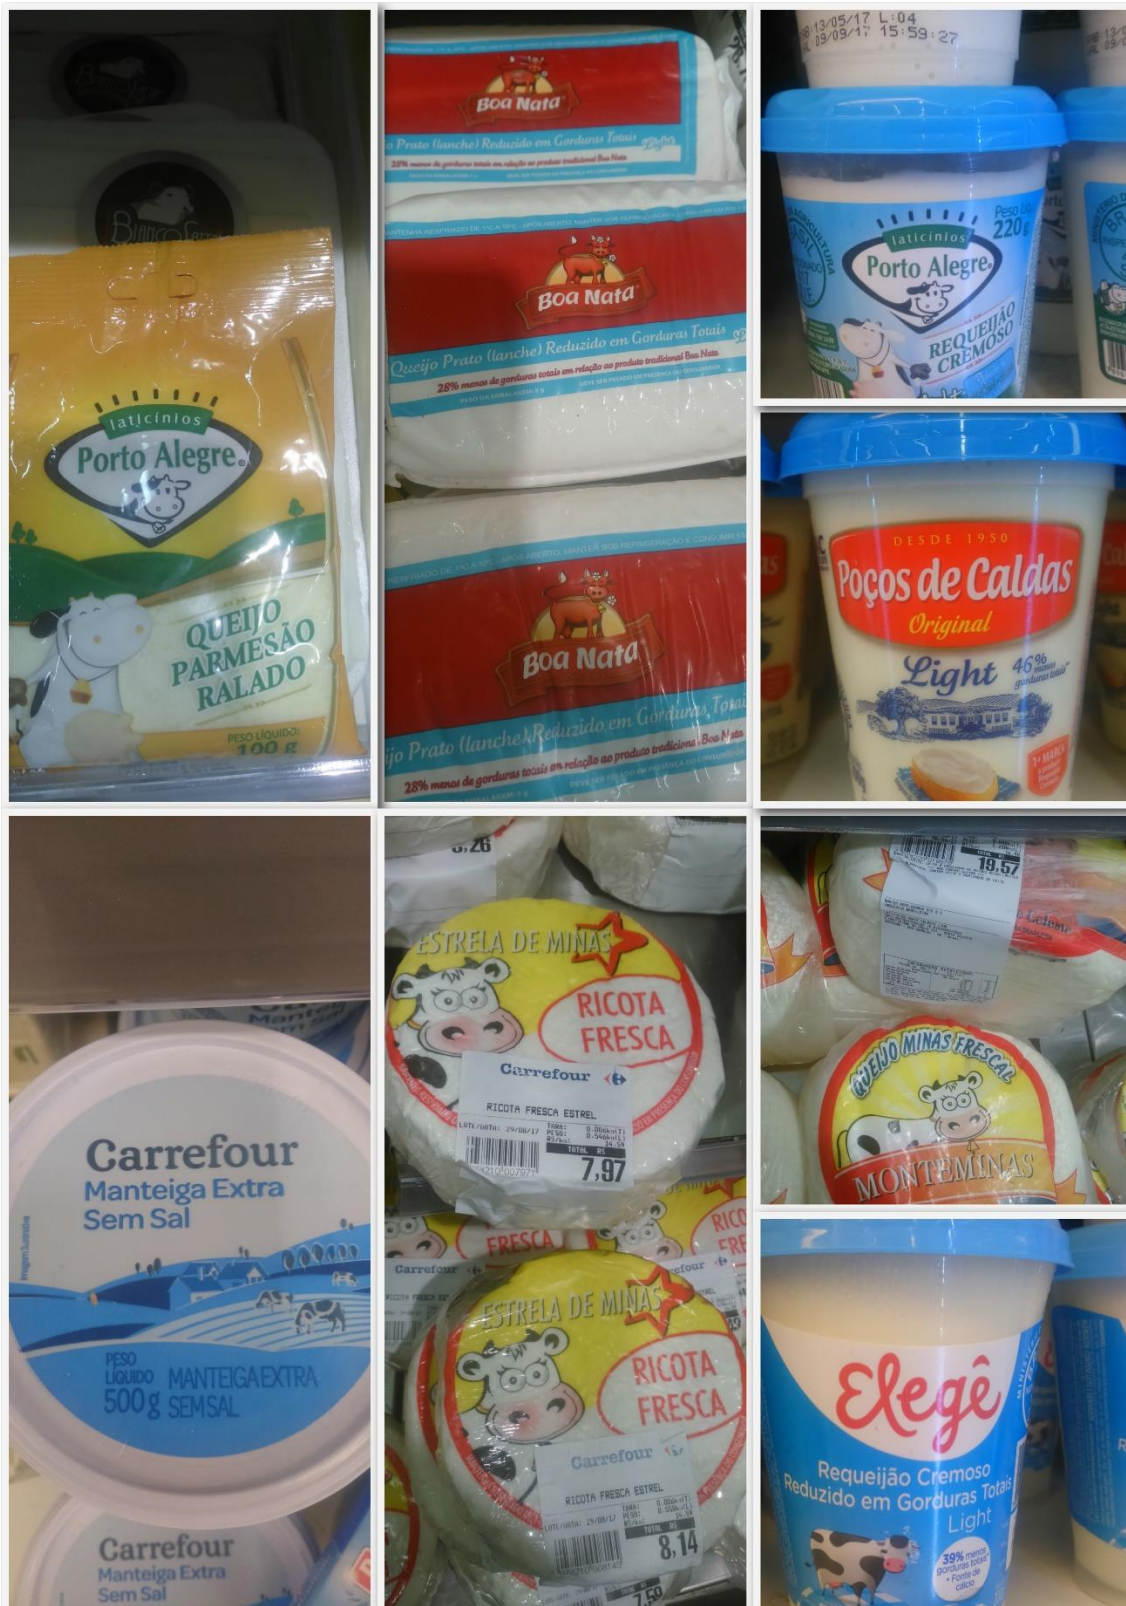

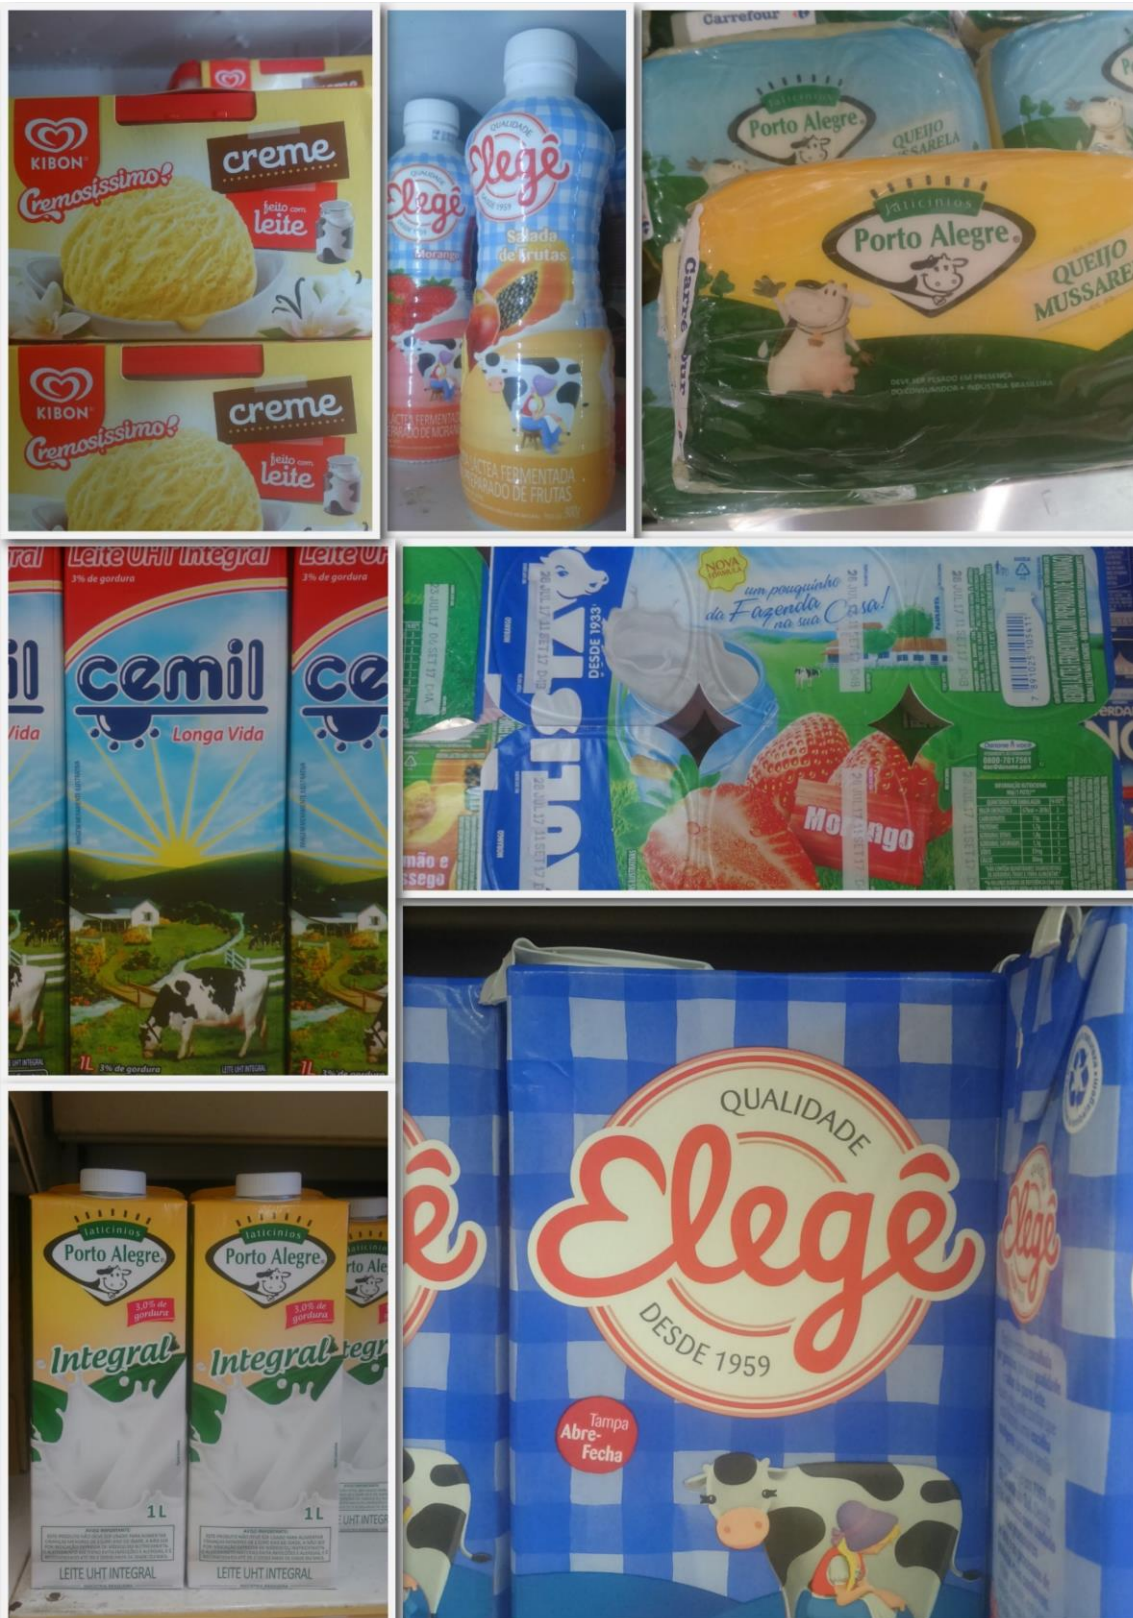

Figure S7. Examples of images from dairy packages with cow sign from Carrefour.

## 2.2. Brazil: Extra

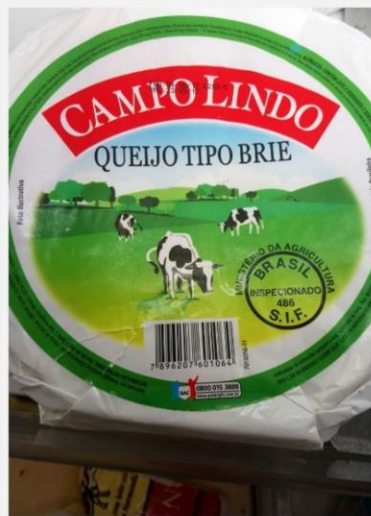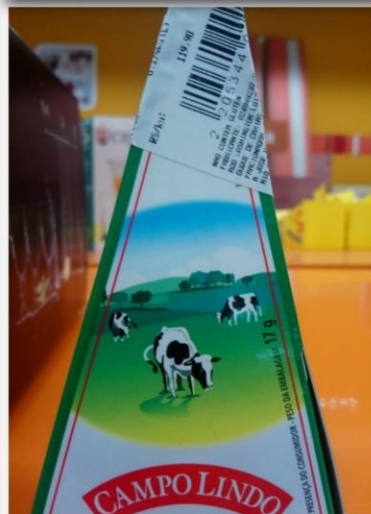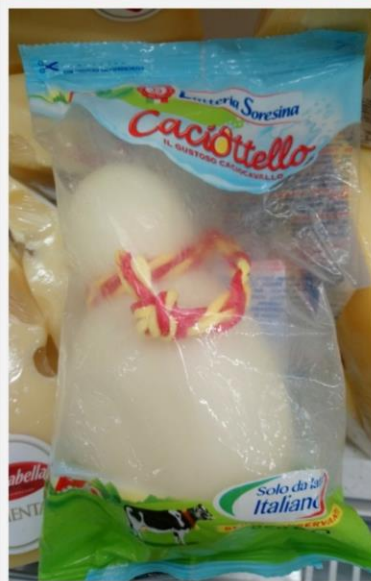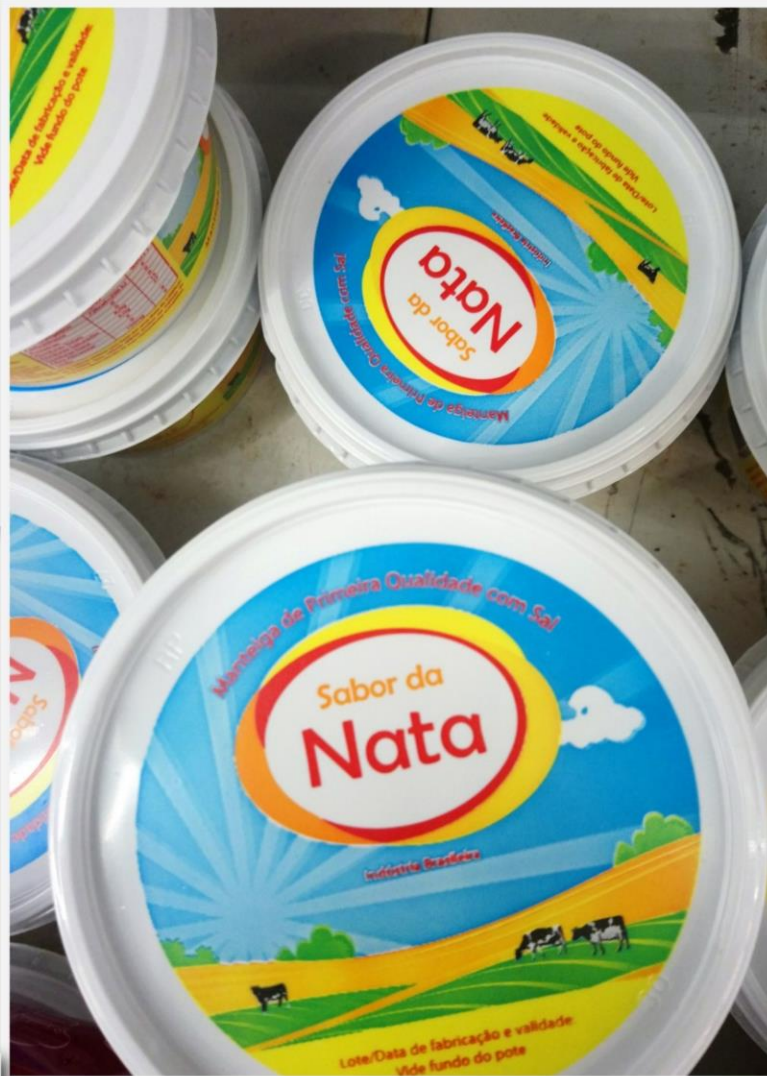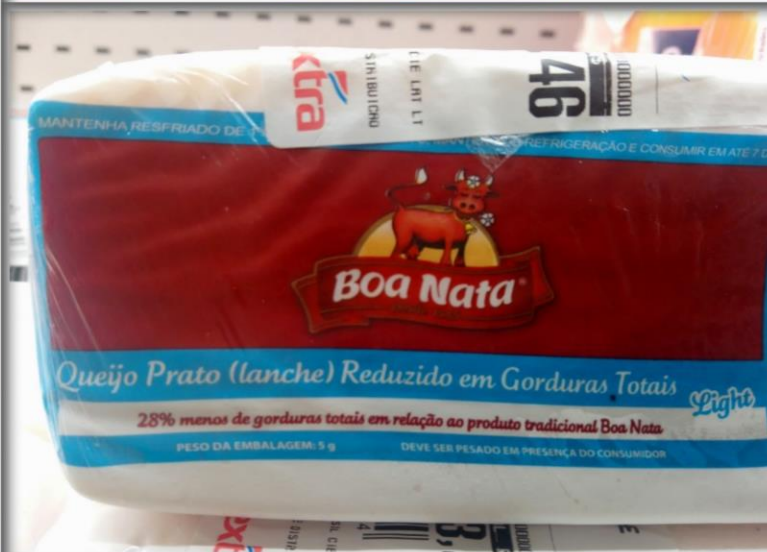

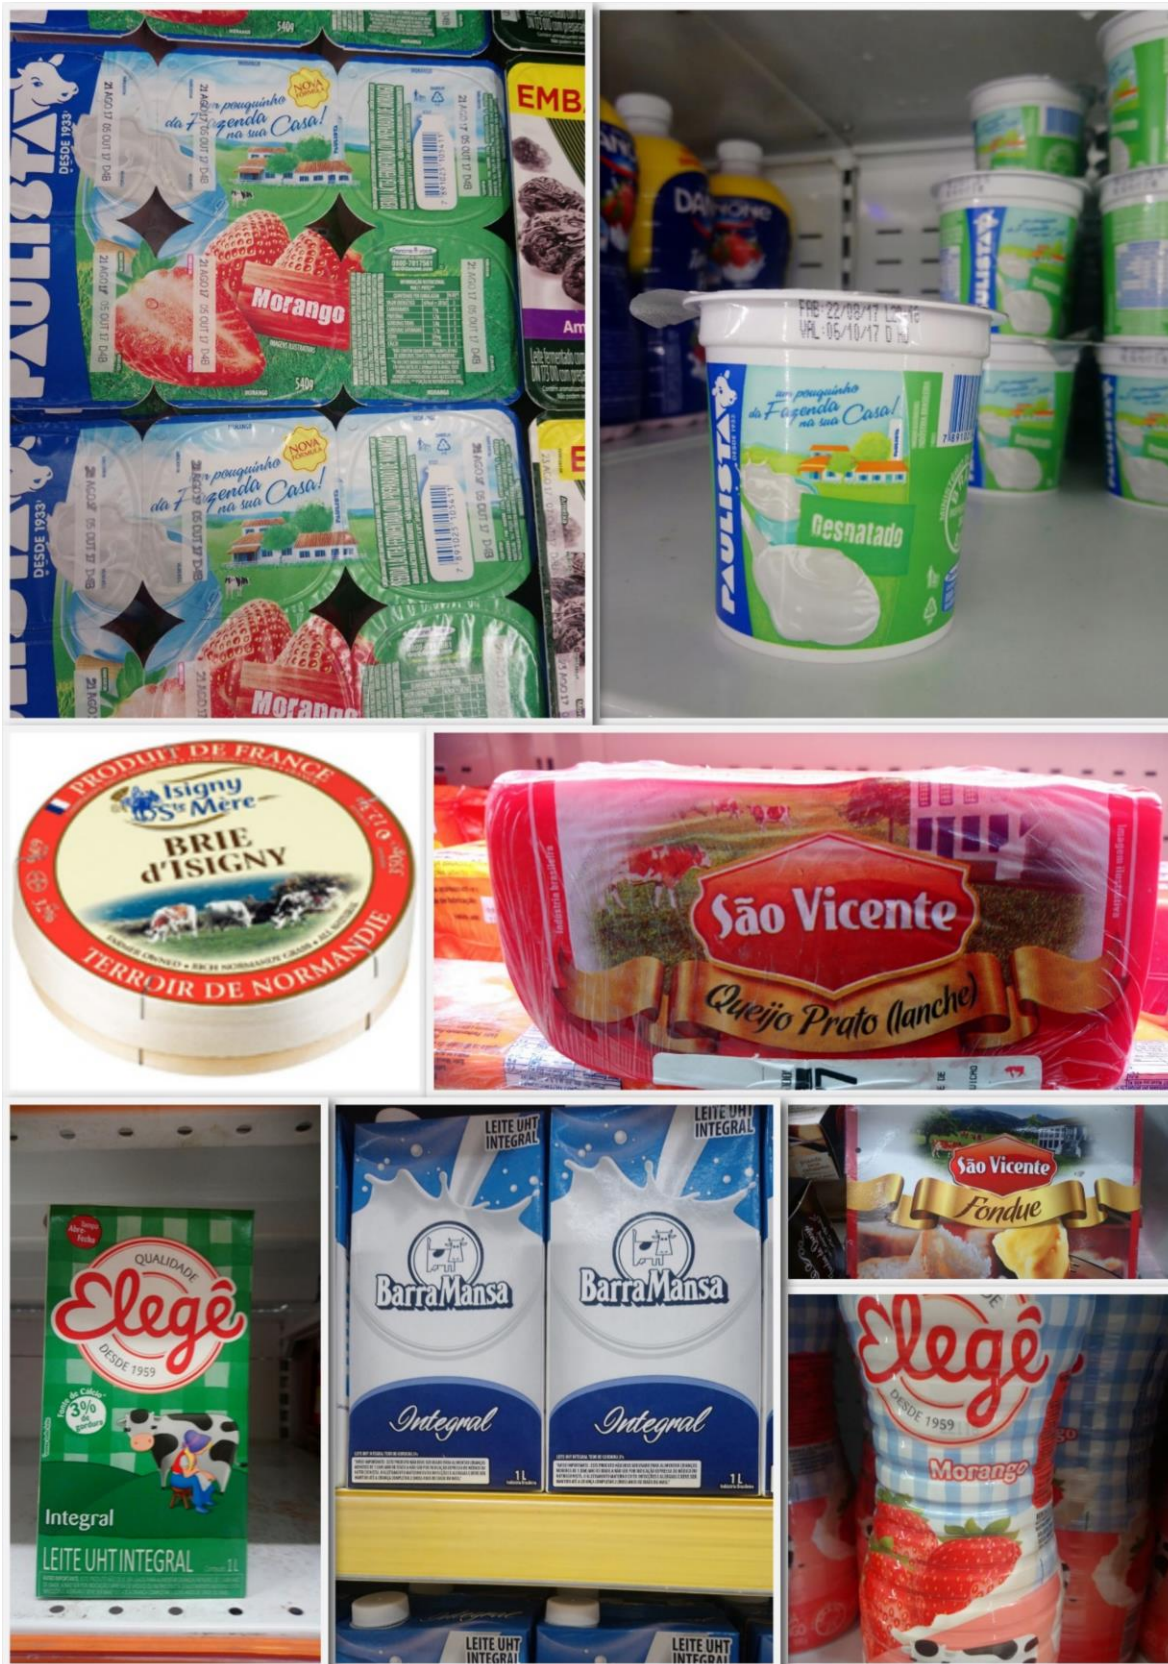

Figure S8. Examples of images from dairy packages with cow sign from Extra.

## 2.3. Brazil: Prezunic

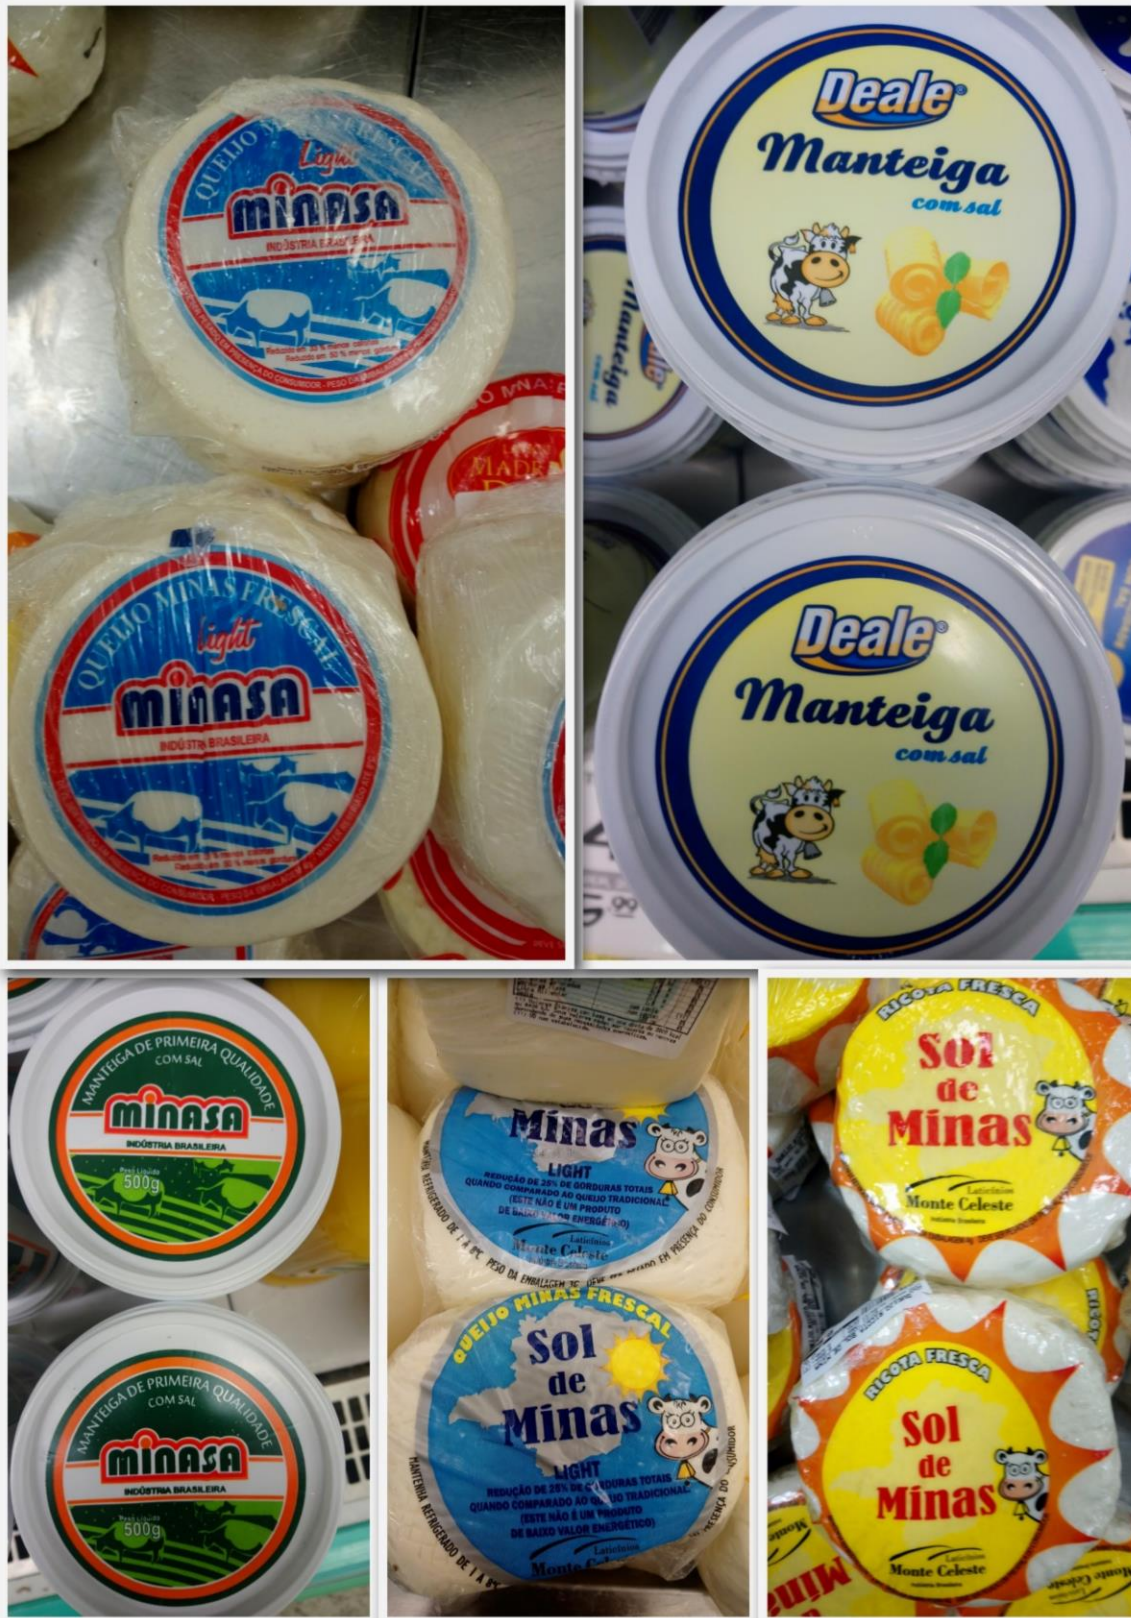

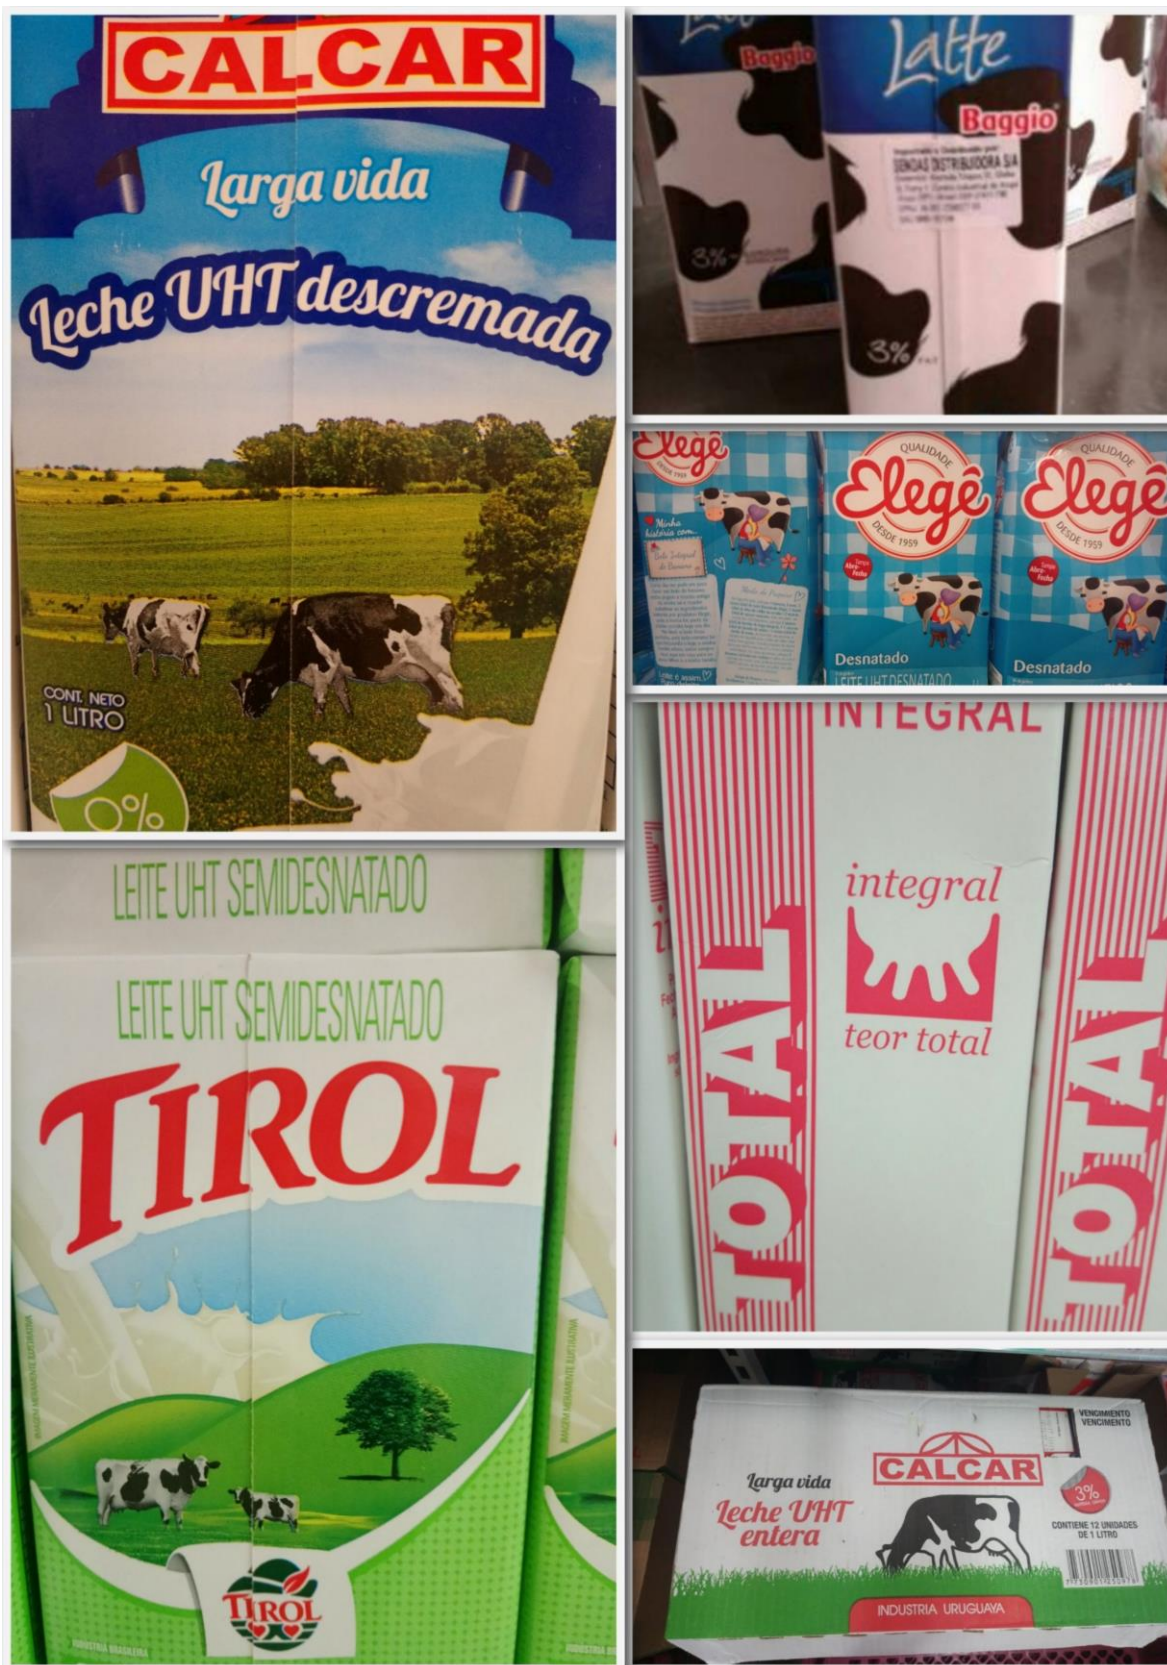

Figure S9. Examples of images from dairy packages with cow sign from Prezunic.

## 2.4. UK: Aldi

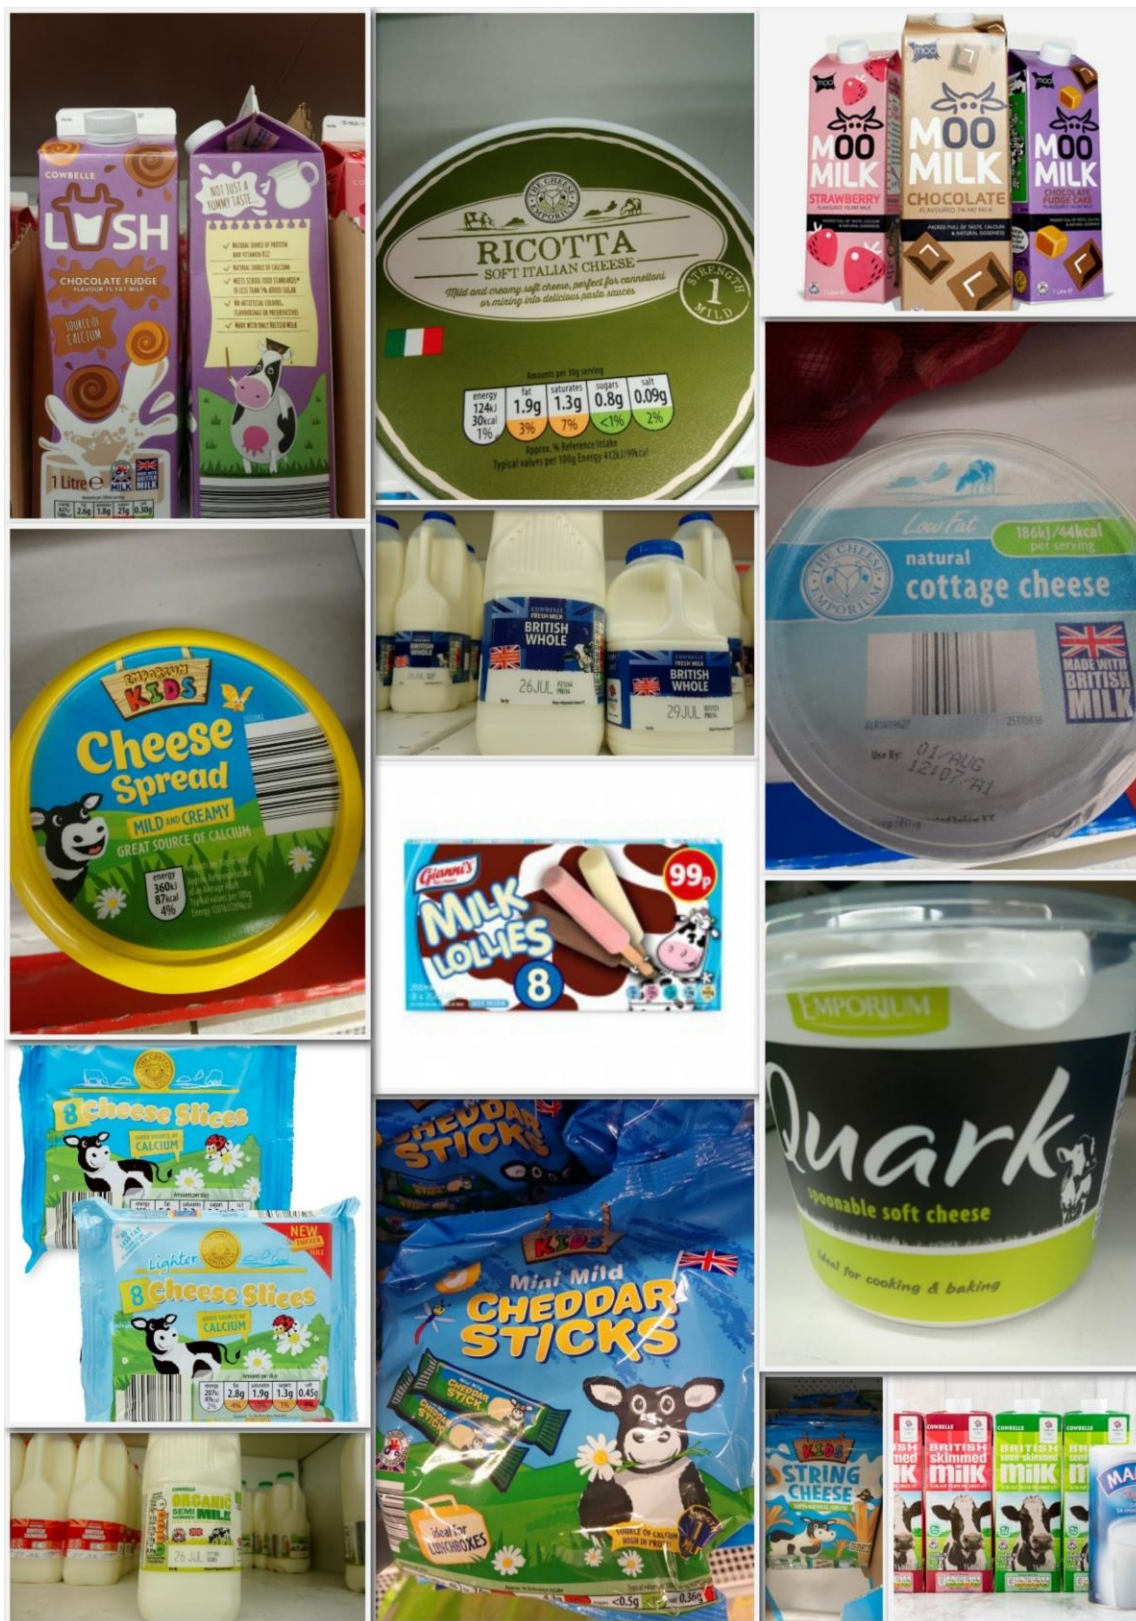

Figure S10. Examples of images from dairy packages with cow sign from Aldi.

## 2.5. UK: Asda

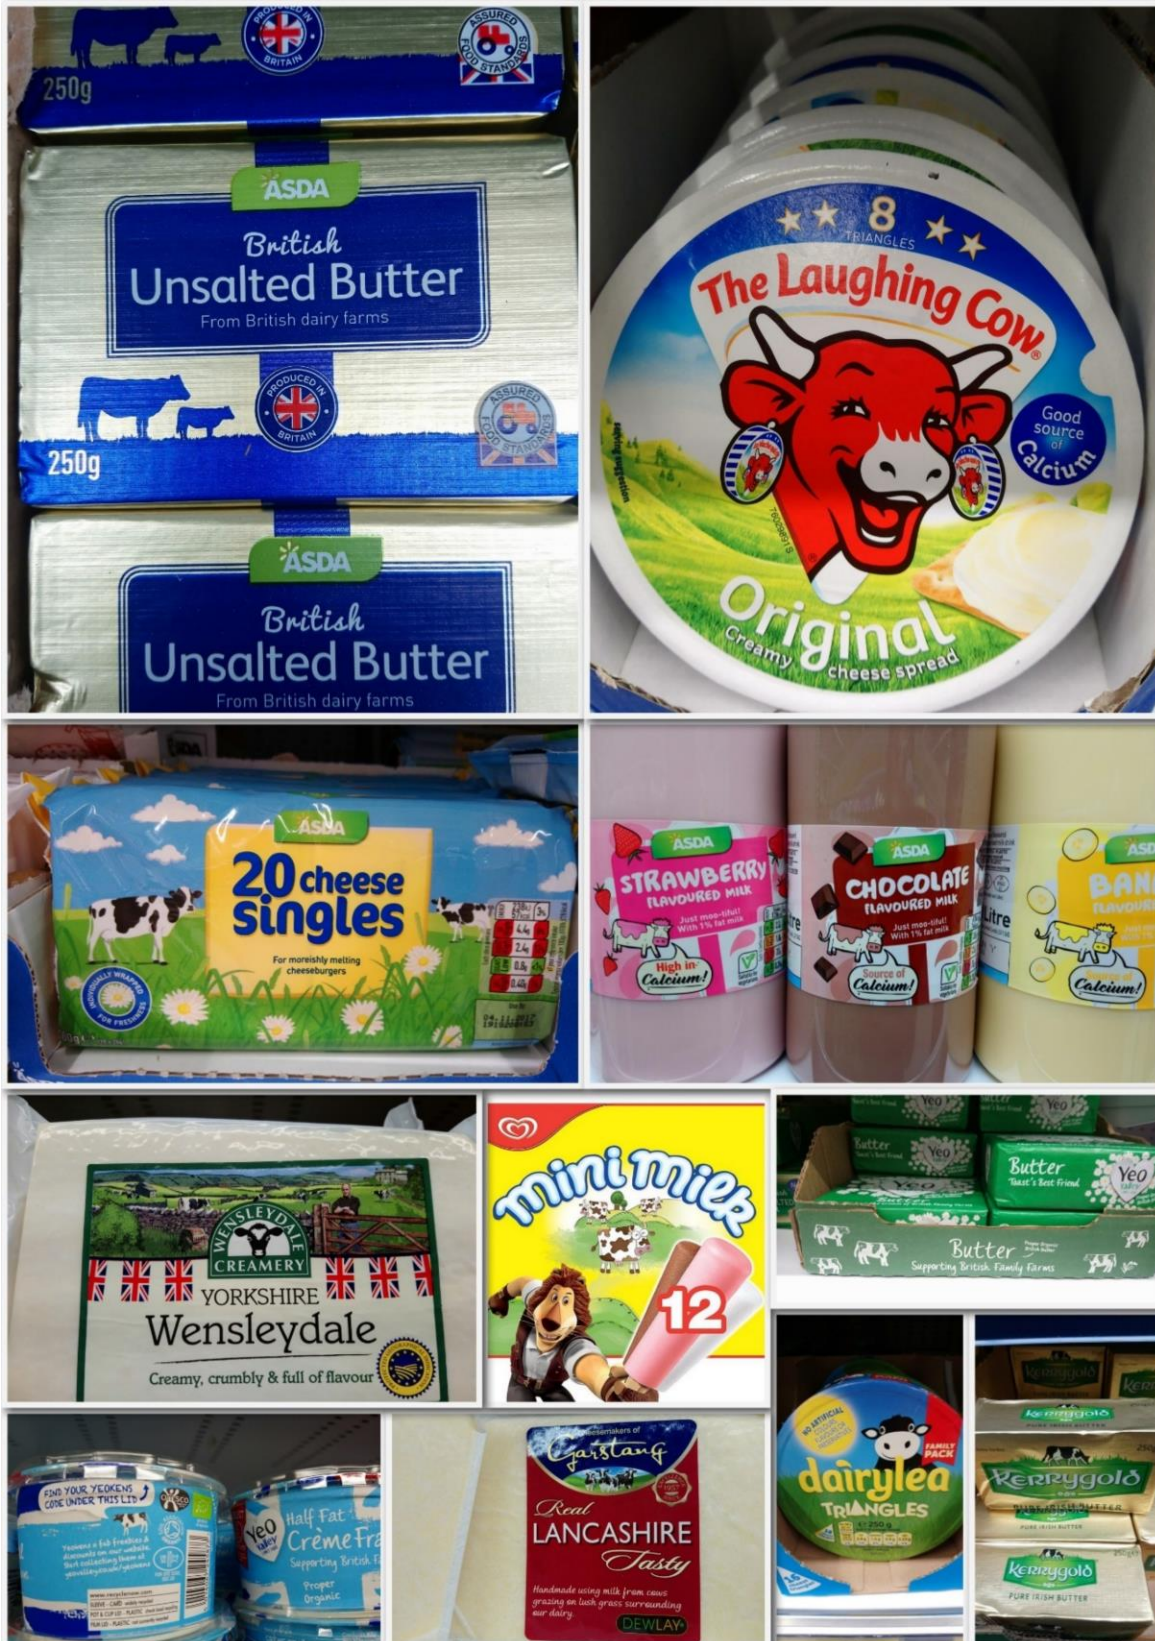

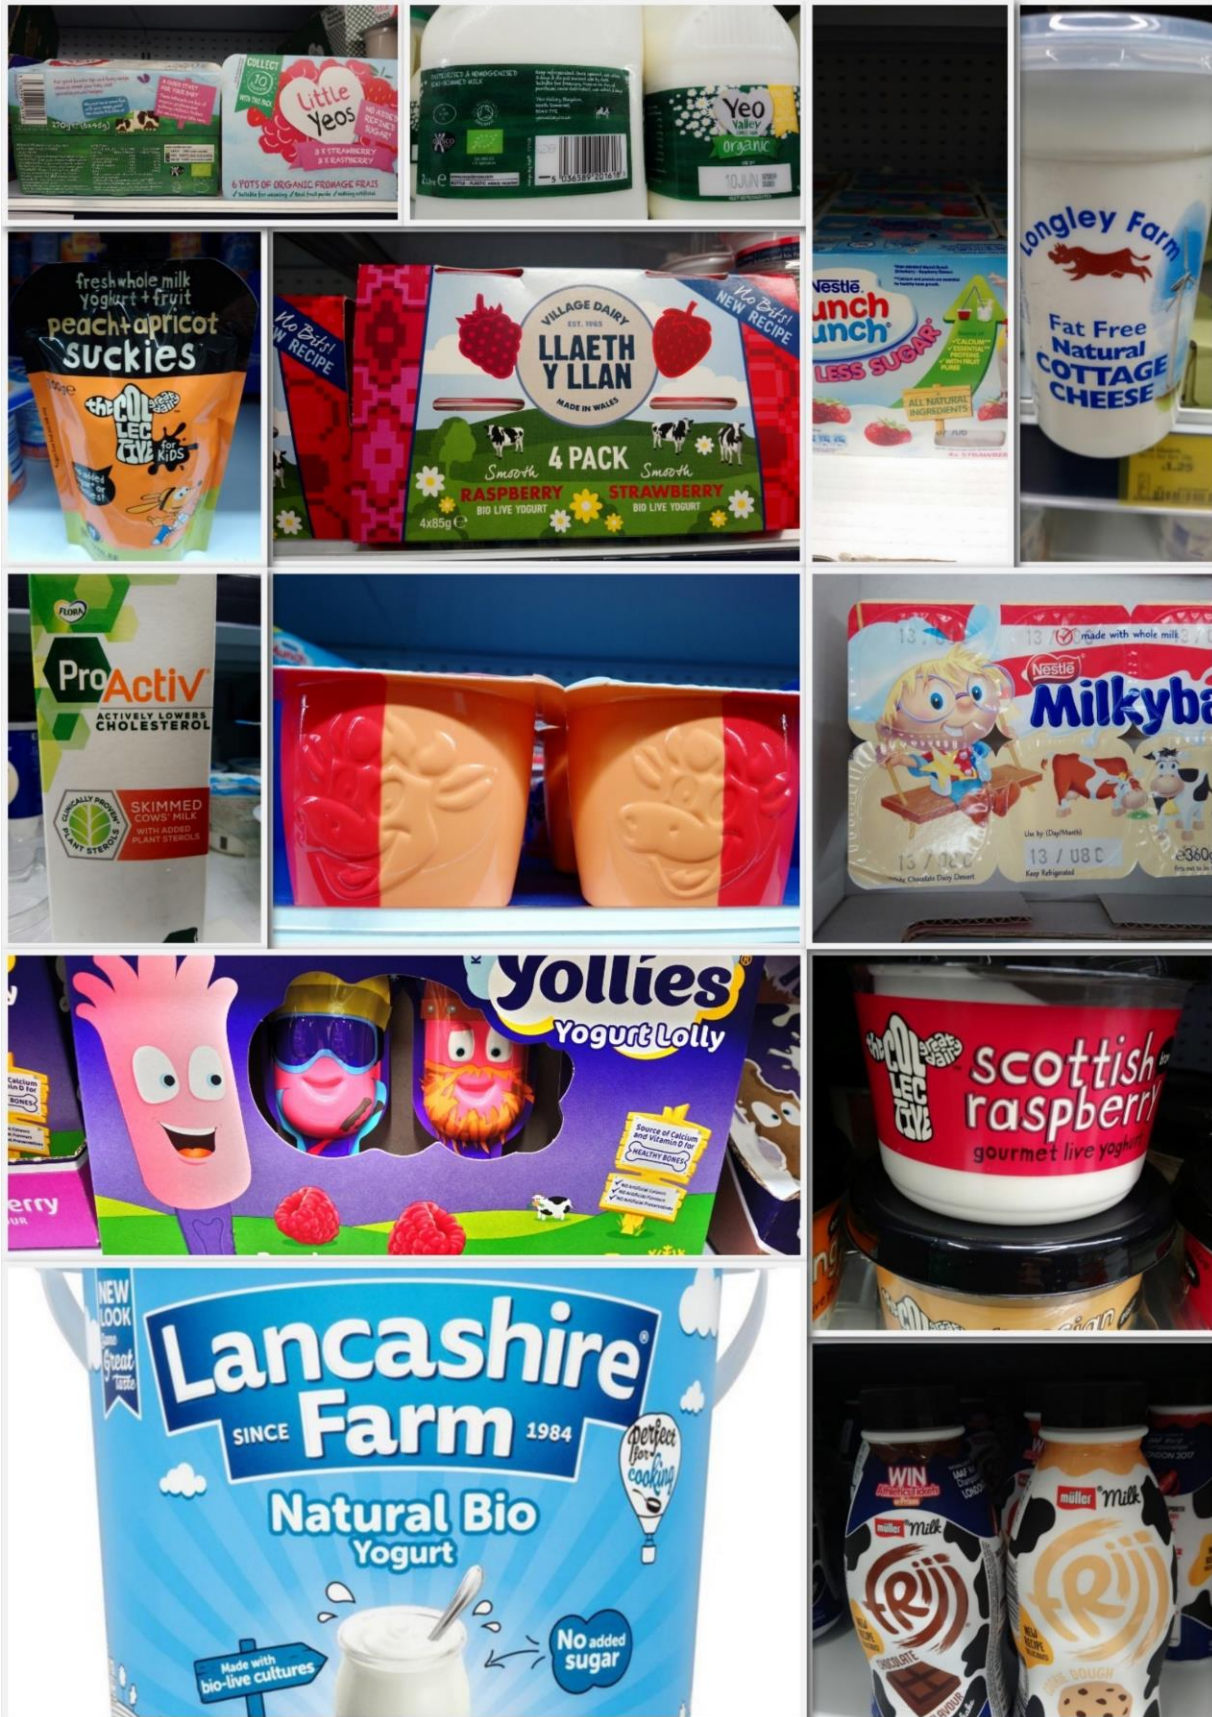

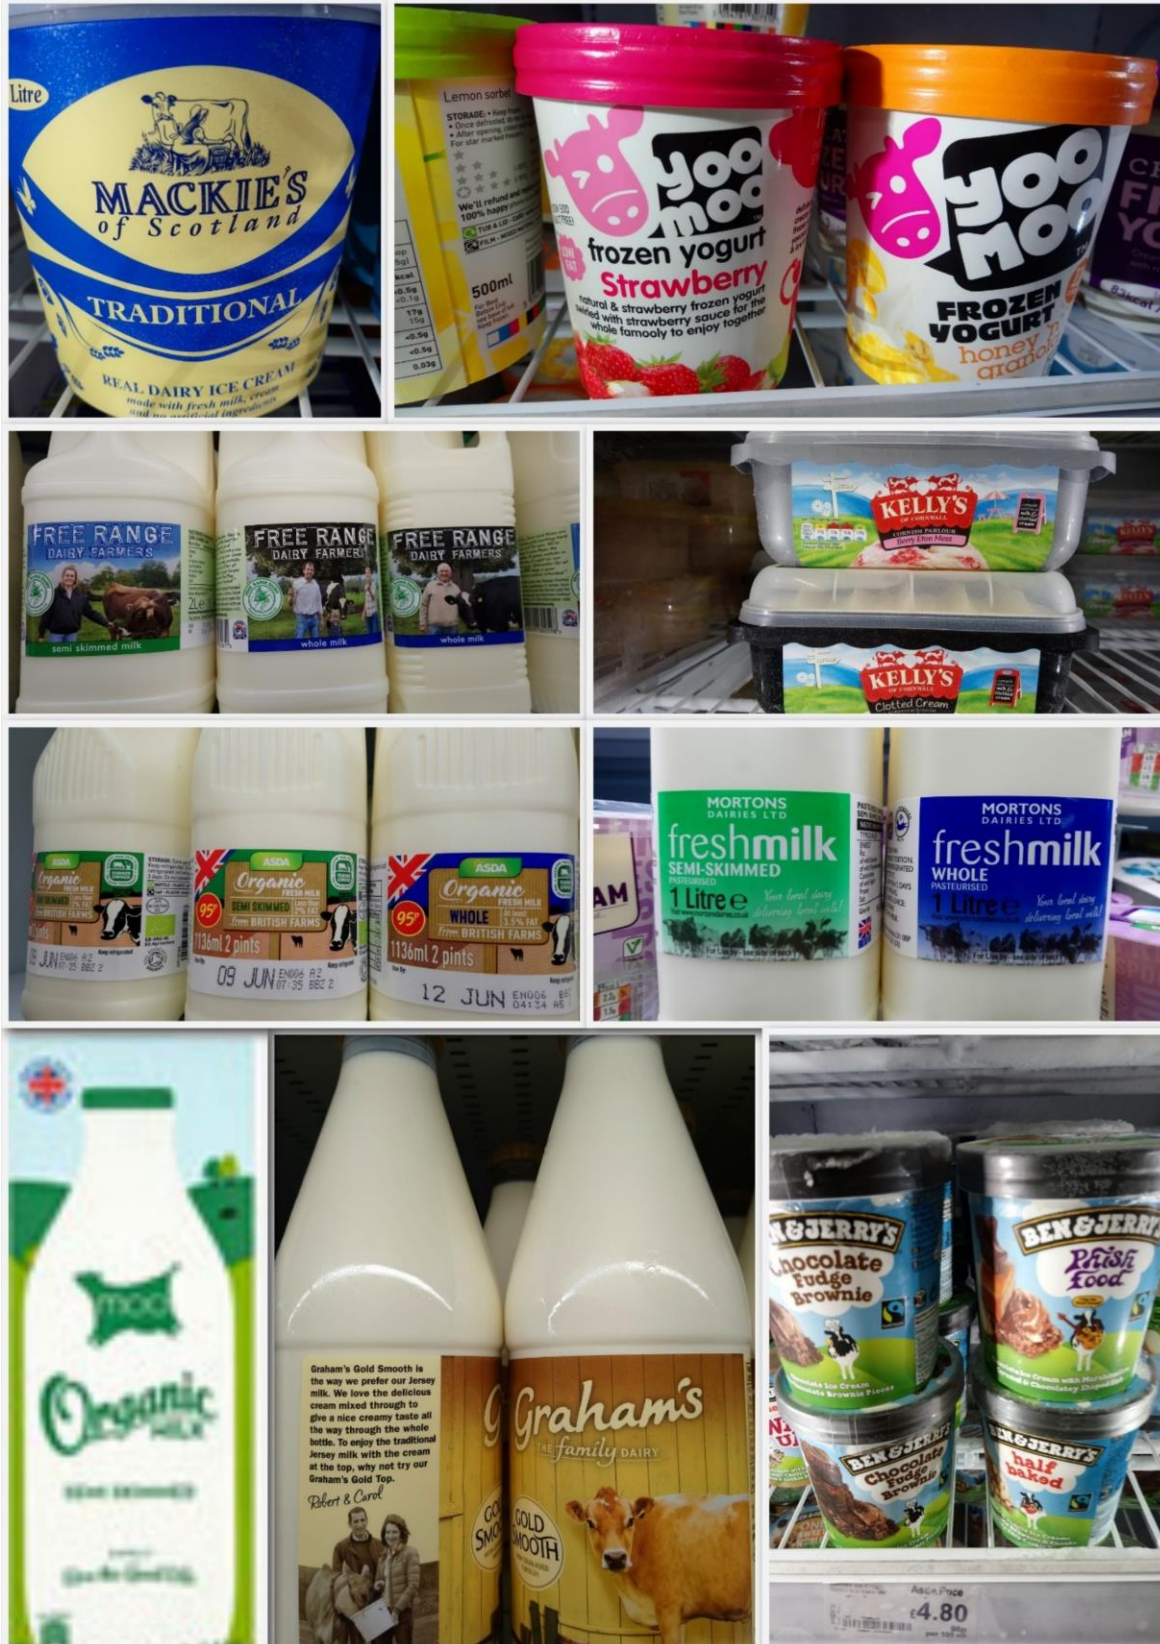

Figure S11. Examples of images from dairy packages with cow sign from Asda.

## 2.6. UK: Tesco

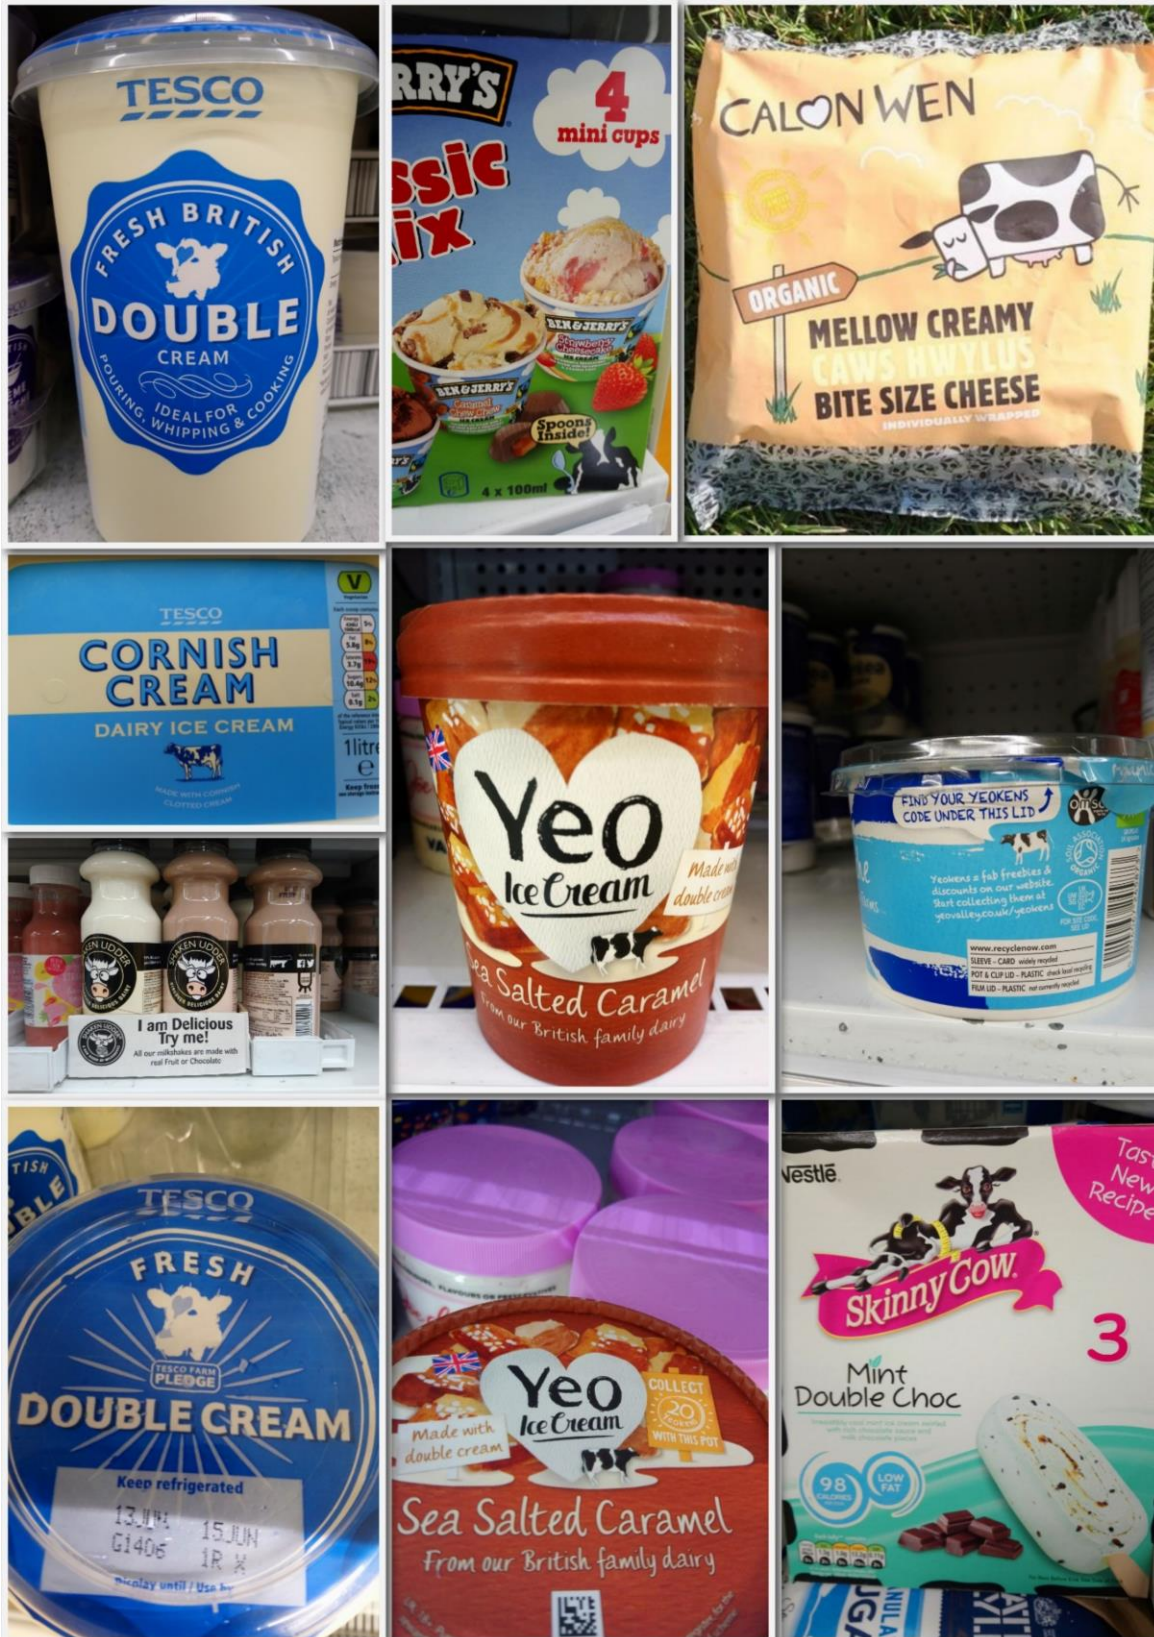

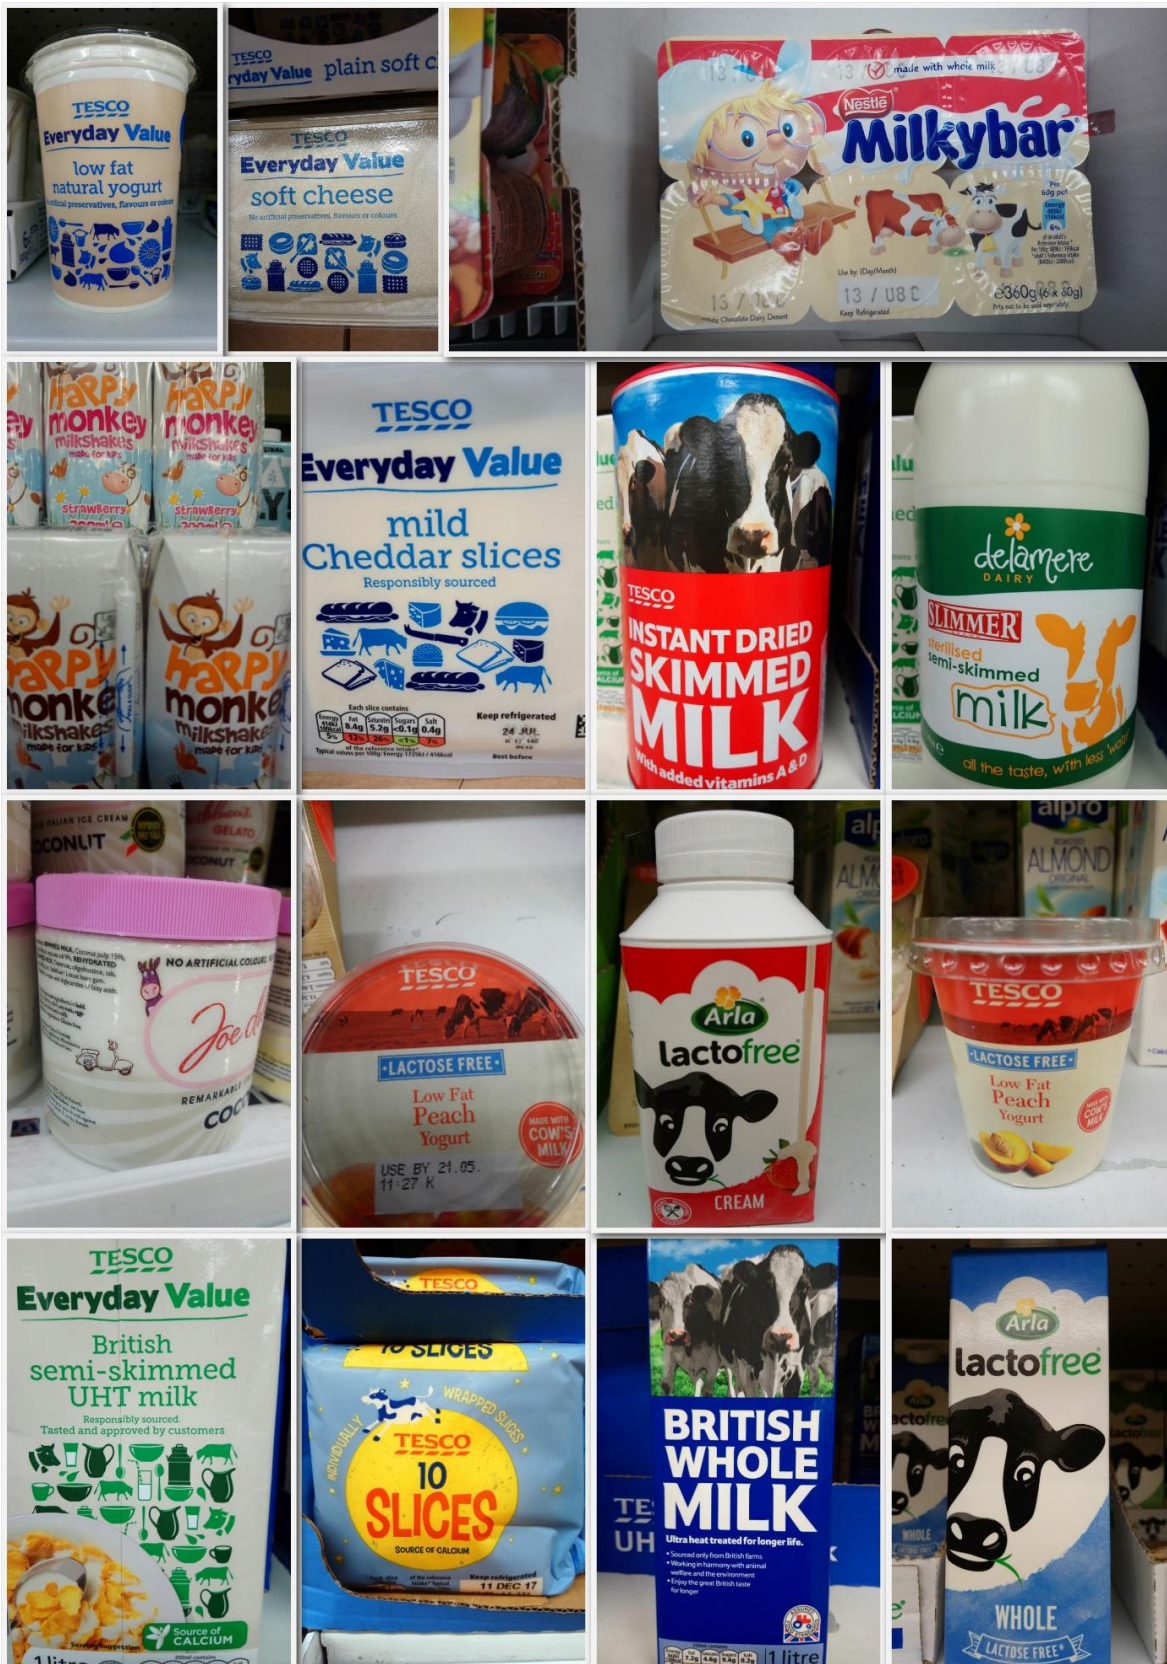

Figure S12. Examples of images from dairy packages with cow sign from Carrefour.

### 3. Brazil: Carrefour Data

This section contains the statistical data referred in the article, separated by types of product (milk, flavoured milk cheese, yoghurt, butter, ice cream).

**Table S1.** Milk.

| <b>Design package*</b> | <b>Cow representation</b> |
|------------------------|---------------------------|
| Porto Alegre           | y                         |
| Ninho                  |                           |
| Molico                 |                           |
| Parmalat               |                           |
| Carrefour              |                           |
| Paulista               | y                         |
| Piracanjuba            |                           |
| Cemil                  | y                         |
| Elegê                  | y                         |
| Batavo                 |                           |
| Danone                 |                           |
| Itambé                 |                           |
| Italac                 |                           |
| <b>Total: 13</b>       | <b>4</b>                  |

\* Printed designs of Dairy products packages found at Carrefour. The letter y at the column "Cow representation" indicates that it was identified some cow representation in the respective package

**Table S2.** Flavoured Milk/Milk shake.

| <b>Design package*</b> | <b>Cow representation</b> |
|------------------------|---------------------------|
| Italac                 |                           |
| Pira kids              |                           |
| Nescau                 |                           |
| Toddy shake            | y                         |
| Todynho                |                           |
| Ninho                  |                           |
| Nesquik                |                           |
| Ovomaltine             |                           |
| Chocoleco              |                           |
| <b>Total: 9</b>        | <b>1</b>                  |

\* Printed designs of Dairy products packages found at Carrefour. The letter y at the column "Cow representation" indicates that it was identified some cow representation in the respective package.

**Table S3.** Yogurt/Fermented Milk/Milk Drink.

| <b>Design package*</b>   | <b>Cow representation</b> |
|--------------------------|---------------------------|
| Danoninho p.suisse       |                           |
| Vigor grego              |                           |
| Itambé zero lactose      |                           |
| Vigor                    |                           |
| Lac free verde campo     |                           |
| Fermentado actmel        |                           |
| Ferm Yakult              |                           |
| Paulista ferm/p.s        | y                         |
| Itambezinho cartoon      |                           |
| Elegê                    | y                         |
| P.s. Nestlé chambinho    |                           |
| Nestlé chamyto           |                           |
| Yogurte ninho            |                           |
| Iog. Nestlé neston       |                           |
| P. s. batavinho          |                           |
| Yog Danone               |                           |
| Yog batavo               |                           |
| Yog Itambé               |                           |
| Yog paulista             | y                         |
| Yog nestlé               |                           |
| Yog molico               |                           |
| Yog verde campo lac free |                           |
| Yog corpus               |                           |
| Yog Danone danio         |                           |
| Danone grego             |                           |
| Nestlé grego             |                           |
| Vigor cartoon            |                           |
| <b>Total: 27</b>         | <b>3</b>                  |

\* Printed designs of Dairy products packages found at Carrefour. The letter y at the column "Cow representation" indicates that it was identified some cow representation in the respective package.

**Table S4.** Cheese.

| <b>Design package*</b> | <b>Cow representation</b> |
|------------------------|---------------------------|
| Nestlé (requeijão)     |                           |
| Danubio                |                           |
| Vigor                  |                           |
| Poços de caldas        | y                         |
| Porto Alegre           | y                         |
| Elegê                  | y                         |
| Catupiry               |                           |
| Itambé                 |                           |
| President              |                           |
| Philadelphia           |                           |
| Serrabela              |                           |
| Polengui zero lactose  |                           |
| Polengui               |                           |
| Tirolez                |                           |
| Quatá                  |                           |
| Lac free verde campo   |                           |
| Supremo                |                           |
| Regina                 |                           |
| Marilia                |                           |
| Sadia                  |                           |
| Frimesa                |                           |
| Boa nata               | y                         |
| Estrela de minas       | y                         |
| Monte Minas            | y                         |
| Minas sol brilhante    |                           |
| <b>Total: 25</b>       | <b>6</b>                  |

\* Printed designs of Dairy products packages found at Carrefour. The letter y at the column "Cow representation" indicates that it was identified some cow representation in the respective package.

**Table S5.** Butter.

| <b>Design package*</b> | <b>Cow representation</b> |
|------------------------|---------------------------|
| Tourinho               |                           |
| Itambé                 |                           |
| Carrefour              | y                         |
| Batavo                 |                           |
| Leco                   |                           |
| <b>Total: 5</b>        | <b>1</b>                  |

\* Printed designs of Dairy products packages found at Carrefour. The letter y at the column "Cow representation" indicates that it was identified some cow representation in the respective package.

**Table S6.** Ice cream.

| <b>Design package*</b>      | <b>Cow representation</b> |
|-----------------------------|---------------------------|
| Perfetto                    |                           |
| Hagen Dazs                  |                           |
| La basque                   |                           |
| Baden Baden                 |                           |
| Nestlé gelato               |                           |
| Nestlé Molico               |                           |
| Nestlé sabores              |                           |
| Kibon blast                 |                           |
| Nestlé moça doceria         |                           |
| Nestlé tradicional          |                           |
| Nobrelle                    |                           |
| Carrefour com calda/cremoso |                           |
| Chantibom                   |                           |
| Kibom cremosissimo          |                           |
| Kibom sorveteria            |                           |
| Kibom mousse                |                           |
| Kibom gelatto               |                           |
| <b>Total: 17</b>            | <b>0</b>                  |

\* Printed designs of Dairy products packages found at Carrefour. The letter y at the column "Cow representation" indicates that it was identified some cow representation in the respective package.

**Table S7.** Carrefour Summary.

| <b>Product</b> | <b>Quantity</b> | <b>Percent</b> |
|----------------|-----------------|----------------|
| Milk           | 4 of 13         | 30,70%         |
| Flavoured milk | 1 of 9          | 11,00%         |
| Yogurt         | 3 of 27         | 11,10%         |
| Cheese         | 6 of 25         | 24%            |
| Butter         | 1 of 5          | 20%            |
| Ice cream      | 0 of 17         | 0%             |
| <b>Total</b>   | <b>15 of 96</b> | <b>15,63%</b>  |

Summary of the percentage of Dairy products packages containing some cow representation in the data obtained from Carrefour.

#### 4. Brazil: Extra Supermarket Data

**Table S8.** Milk.

| <b>Design package*</b> | <b>Cow Representation</b> |
|------------------------|---------------------------|
| Barra mansa            | y                         |
| Gloria                 |                           |
| Elegê                  | y                         |
| Parmalat               |                           |
| Languru                |                           |
| Dalia                  |                           |
| Qualitá                |                           |
| Ninho                  |                           |
| Timbaúba               |                           |
| Piracanjuba            |                           |
| <b>Total:11</b>        | <b>Total: 2</b>           |

\* Printed designs of Dairy products packages found at Extra. The letter y at the column "Cow representation" indicates that it was identified some cow representation in the respective package

**Table S9.** Flavoured Milk/Milk shake.

| <b>Design package*</b> | <b>Cow representation</b> |
|------------------------|---------------------------|
| Toddy shake            | y                         |
| Todynho                |                           |
| Nescau                 |                           |
| Pira kids              |                           |
| Italac                 |                           |
| Quatá/quatazinho       |                           |
| <b>Total: 7</b>        | <b>1</b>                  |

\* Printed designs of Dairy products packages found at Extra. The letter y at the column "Cow representation" indicates that it was identified some cow representation in the respective package.

**Table S10.** Yogurt/Fermented Milk/Milk Drink.

| <b>Design package*</b>  | <b>Cow representation</b> |
|-------------------------|---------------------------|
| Leco yog                |                           |
| Vigor grego             |                           |
| Batavo grego            |                           |
| Nestle grego            |                           |
| Frimesa gre             |                           |
| Danone gre              |                           |
| Elegê                   | y                         |
| Nestle chambinho        |                           |
| Vigor p.s.              |                           |
| Vigor yog               |                           |
| Danone p.s. (Danoninho) |                           |
| Danone yog              |                           |
| Paulista yog            | y                         |
| Batavo yog              |                           |
| Corpus                  |                           |
| Verde campo lac free    |                           |
| Ninho                   |                           |
| Activia                 |                           |
| Nestle yog              |                           |
| Fermentado yakult       |                           |
| Fermentado nestlé       |                           |
| Fermentado elegê        |                           |
| <b>Total: 23</b>        | <b>2</b>                  |

\* Printed designs of Dairy products packages found at Extra. The letter y at the column "Cow representation" indicates that it was identified some cow representation in the respective package.

**Table S11.** Cheese.

| <b>Design package*</b>     | <b>Cow representation</b> |
|----------------------------|---------------------------|
| Macuco                     |                           |
| São Vicente                | y                         |
| Catupiry                   |                           |
| Pedra selada               |                           |
| Tigre                      |                           |
| Campo lindo                |                           |
| Polengui                   |                           |
| Danubio                    |                           |
| Bergader                   |                           |
| São pedro roça chique      |                           |
| Boa nata                   | y                         |
| Visconde de Mauá           |                           |
| Verde campo lac free       |                           |
| Qualitá                    |                           |
| Frimesa                    |                           |
| Sadia                      |                           |
| Tirolez                    |                           |
| President                  |                           |
| Isigny St Mere             | y                         |
| Campo limpo                | y                         |
| Faixa azul                 |                           |
| Loteria soezina            |                           |
| Loteria soezina cacciotelo | y                         |
| Gran formaggio             |                           |
| Pinna                      |                           |
| <b>Total: 26</b>           | <b>5</b>                  |

\* Printed designs of Dairy products packages found at Extra. The letter y at the column "Cow representation" indicates that it was identified some cow representation in the respective package.

**Table S12.** Butter.

| <b>Design package*</b> | <b>Cow representation</b> |
|------------------------|---------------------------|
| president              |                           |
| Leco                   |                           |
| Qualitá                |                           |
| Boa nata               | y                         |
| Sabor da nata          | y                         |
| Regina                 |                           |
| Gran mestri            |                           |
| <b>Total: 8</b>        | <b>2</b>                  |

\* Printed designs of Dairy products packages found at Extra. The letter y at the column "Cow representation" indicates that it was identified some cow representation in the respective package.

**Table S13.** Ice cream.

| <b>Design package*</b> | <b>Cow representation</b> |
|------------------------|---------------------------|
| Nestlé glato           |                           |
| Nestlé vários sabores  |                           |
| Nestlé tradicional     |                           |
| Qualitá                |                           |
| Nobrelli               |                           |
| Kibom blast            |                           |
| kibom Sorveteria       |                           |
| Kibom cremosissimo     |                           |
| Kibom mousse           |                           |
| Kibom gelatto          |                           |
| La basque              |                           |
| Baden Baden            |                           |
| Bem e jerry's          | y                         |
| Hagen Dasz             |                           |
| Dileto                 |                           |
| Dileto ovomaltine      |                           |
| <b>Total: 16</b>       | <b>1</b>                  |

\* Printed designs of Dairy products packages found at Extra. The letter y at the column "Cow representation" indicates that it was identified some cow representation in the respective package.

**Table S14.** Extra Summary.

| <b>Product</b> | <b>Quantity</b> | <b>Percent</b> |
|----------------|-----------------|----------------|
| Milk           | 2 of 11         | 18,18%         |
| Flavoured milk | 1 of 7          | 14,28%         |
| Yogurt         | 2 of 23         | 8,70%          |
| Cheese         | 5 of 26         | 19,23%         |
| Butter         | 2 of 8          | 25%            |
| Ice cream      | 1 of 16         | 6,25%          |
| <b>Total</b>   | <b>13 of 91</b> | <b>14,29%</b>  |

Summary of the percentage of Dairy products packages containing some cow representation in the data obtained from Extra.

## 5. Brazil: Prezunic Data

**Table S15.** Milk.

| <b>Design package*</b> | <b>Cow representation</b> |
|------------------------|---------------------------|
| Parmalat               |                           |
| Elegê                  | y                         |
| Piracanjuba            |                           |
| Quatá                  |                           |
| Danone                 |                           |
| Calcar                 | y                         |
| Italac                 |                           |
| Tirol                  | y                         |
| Zero                   |                           |
| Total                  | y                         |
| Corpus                 |                           |
| Molico                 |                           |
| Ninho                  |                           |
| Baggio                 | y                         |
| <b>Total: 14</b>       | <b>5</b>                  |

\* Printed designs of Dairy products packages found at Prezunic. The letter y at the column "Cow representation" indicates that it was identified some cow representation in the respective package.

**Table S16.** Flavoured Milk/Milk shake.

| <b>Design package*</b> | <b>Cow representation</b> |
|------------------------|---------------------------|
| Quatá                  |                           |
| Nescau                 |                           |
| Todynho                |                           |
| Nesquik                |                           |
| Danette                |                           |
| Ninho                  |                           |
| <b>Total: 6</b>        | <b>0</b>                  |

\* Printed designs of Dairy products packages found at Prezunic. The letter y at the column "Cow representation" indicates that it was identified some cow representation in the respective package.

**Table S17.** Yogurt/Fermented Milk/Milk Drink.

| <b>Design package*</b> | <b>Cow representation</b> |
|------------------------|---------------------------|
| Vigor                  |                           |
| Vigor grego            |                           |
| Vigor p.s              |                           |
| Leco                   |                           |
| Itambé                 |                           |
| Itambezinho            |                           |
| Elege                  | y                         |
| Paulista               | y                         |
| Danoninho              |                           |
| Activia                |                           |
| Corpus                 |                           |
| Danone grego/yogurt    |                           |
| Nestlé yog             |                           |
| Nestle grego           |                           |
| Molico yog             |                           |
| Ninho yog              |                           |
| Yog. Batavo            |                           |
| Batavinho p. s.        |                           |
| Chambinho              |                           |
| Verde campo lac free   |                           |
| Primeiro yog           |                           |
| Fermentado batavo      |                           |
| Fermentado yakult      |                           |
| Fermentado actmel      |                           |
| <b>Total: 24</b>       | <b>2</b>                  |

\* Printed designs of Dairy products packages found at Prezunic. The letter y at the column "Cow representation" indicates that it was identified some cow representation in the respective package.

**Table S18.** Cheese.

| <b>Design package*</b> | <b>Cow representation</b> |
|------------------------|---------------------------|
| Catupiry               |                           |
| Boa nata               | y                         |
| Vale da castra         |                           |
| Marilia                |                           |
| Sertanorte             |                           |
| Regina                 |                           |
| Cremolat               |                           |
| Tirolez                |                           |
| Bom pastor             |                           |
| Verde campo lac free   |                           |
| Faiza azul             |                           |
| Polengui               |                           |
| Danubio                |                           |
| Polengui frescatino    |                           |
| Polengui allouette     |                           |
| Philadelphia           |                           |
| Sadia                  |                           |
| Sol de minas           | y                         |
| Mimasa                 | y                         |
| Requeijão prezunic     |                           |
| Clara nata             |                           |
| Requeijão primeiro     |                           |
| Vigor                  |                           |
| Nestle                 |                           |
| <b>Total: 24</b>       | <b>3</b>                  |

\* Printed designs of Dairy products packages found at Prezunic. The letter y at the column "Cow representation" indicates that it was identified some cow representation in the respective package.

**Table S19.** Butter.

| <b>Design package*</b> | <b>Cow representation</b> |
|------------------------|---------------------------|
| Itambe                 |                           |
| Deale                  | y                         |
| Prezunic               |                           |
| Mimasa                 | y                         |
| Batavo                 |                           |
| Primeiro               |                           |
| President              |                           |
| Leco                   |                           |
| <b>Total: 8</b>        | <b>2</b>                  |

\* Printed designs of Dairy products packages found at Prezunic. The letter y at the column "Cow representation" indicates that it was identified some cow representation in the respective package.

**Table S20.** Ice cream.

| <b>Design package*</b> | <b>Cow representation</b> |
|------------------------|---------------------------|
| Nestlé gelato          |                           |
| Molico                 |                           |
| Nestlé sabores         |                           |
| Nestle tradicional     |                           |
| Teresopolis            |                           |
| Chantibom              |                           |
| Kibom crem             |                           |
| Kibom blast            |                           |
| Kibom zero             |                           |
| Kibom gelatto          |                           |
| Kibom 3 selecoes       |                           |
| <b>Total: 11</b>       | <b>0</b>                  |

\* Printed designs of Dairy products packages found at Prezunic. The letter y at the column "Cow representation" indicates that it was identified some cow representation in the respective package.

**Table S21.** Prezunic Summary.

| <b>Product</b> | <b>Quantity</b> | <b>Percent</b> |
|----------------|-----------------|----------------|
| Milk           | 5 of 14         | 35,71%         |
| Flavoured milk | 0 of 6          | 0%             |
| Yogurt         | 2 of 24         | 8,33%          |
| Cheese         | 3 of 24         | 12,50%         |
| Butter         | 2 of 8          | 25%            |
| Ice cream      | 0 of 11         | 0%             |
| <b>Total</b>   | <b>12 of 87</b> | <b>15,63%</b>  |

Summary of the percentage of Dairy products packages containing some cow representation in the data obtained from Prezunic.

## 6. UK: Aldi Data

**Table S22.** Milk.

| <b>Design package*</b>             | <b>Cow representation</b> |
|------------------------------------|---------------------------|
| Cowbelle British Milk long life    | y                         |
| Cowbelle fresh milk                | y                         |
| Cowbelle fresh milk organic        | y                         |
| Cowbelle British fresh with no Cow |                           |
| <b>Total: 4</b>                    | <b>3</b>                  |

\* Printed designs of Dairy products packages found at Aldi. The letter y at the column "Cow representation" indicates that it was identified some cow representation in the respective package.

**Table S23.** Flavoured Milk/Milk shake.

| <b>Design package*</b>  | <b>Cow representation</b> |
|-------------------------|---------------------------|
| Cowbelle flavoured milk | y                         |
| Aldi Milk shake         |                           |
| Moo milk                | y                         |
| <b>Total: 3</b>         | <b>2</b>                  |

\* Printed designs of Dairy products packages found at Aldi. The letter y at the column "Cow representation" indicates that it was identified some cow representation in the respective package.

**Table S24.** Yogurt/Fermented Milk/Milk Drink.

| <b>Design package*</b>              | <b>Cow representation</b> |
|-------------------------------------|---------------------------|
| Broklea active                      |                           |
| Specially selected luxury yogurt    |                           |
| Specially selected farmhouse yogurt |                           |
| Broklea split pots                  |                           |
| Broklea fat free                    |                           |
| Broklea creamy                      |                           |
| Broklea greek                       |                           |
| Broklea skyr                        |                           |
| <b>Total: 8</b>                     | <b>0</b>                  |

\* Printed designs of Dairy products packages found at Aldi. The letter y at the column "Cow representation" indicates that it was identified some cow representation in the respective package.

**Table S25.** Cheese.

| <b>Design package*</b>       | <b>Cow representation</b> |
|------------------------------|---------------------------|
| Emporium mature              |                           |
| Emporium nationalities       |                           |
| Emporium soft cheese         | y                         |
| Emporium grated              |                           |
| The cheese emporium          |                           |
| Everyday essential (various) |                           |
| Emporium quark               | y                         |
| The cheese emporium ricota   |                           |
| Emporium kids                | y                         |
| The cheese emporium triangle | y                         |
| The cheese emporium cottage  | y                         |
| Emporium kids spread         | y                         |
| Lyttos                       |                           |
| Roi de trefle                |                           |
| <b>Total: 14</b>             | <b>6</b>                  |

\* Printed designs of Dairy products packages found at Aldi. The letter y at the column "Cow representation" indicates that it was identified some cow representation in the respective package.

**Table S26.** Butter.

| <b>Design package*</b> | <b>Cow representation</b> |
|------------------------|---------------------------|
| Green meadow           |                           |
| Green vale             |                           |
| <b>Total: 2</b>        | <b>0</b>                  |

\* Printed designs of Dairy products packages found at Aldi. The letter y at the column "Cow representation" indicates that it was identified some cow representation in the respective package.

**Table S27.** Ice Cream (includes frozen yoghurt).

| <b>Design package*</b>   | <b>Cow representation</b> |
|--------------------------|---------------------------|
| Gianini's milk lollies   | y                         |
| Gianini's de luxe        |                           |
| Gianini's ice cream      |                           |
| Gianini's Sorbet         |                           |
| Gianini's American style |                           |
| Strahams ice cream       |                           |
| Oreo                     |                           |
| Specially selected       |                           |
| <b>Total: 8</b>          | <b>1</b>                  |

\* Printed designs of Dairy products packages found at Aldi. The letter y at the column "Cow representation" indicates that it was identified some cow representation in the respective package.

6.1. Selected package images from Aldi

Cowbelle British fresh milk

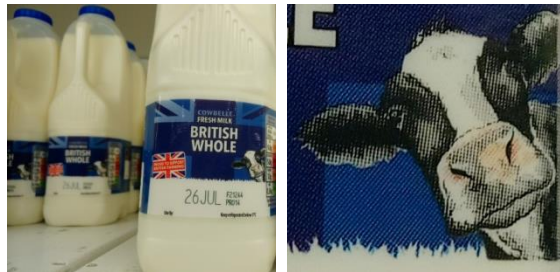

Cowbelle British fresh organic milk

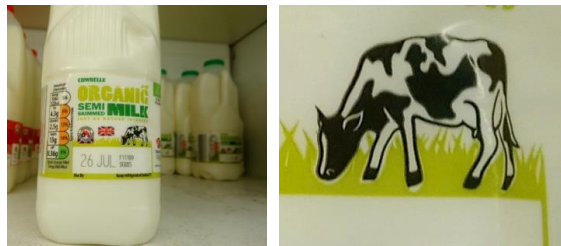

Cowbelle long life milk

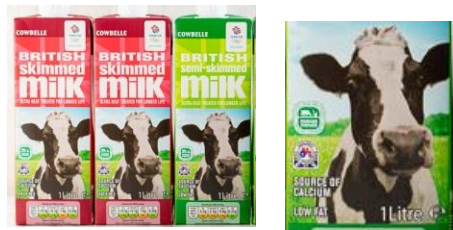

Cowbelle flavoured milk

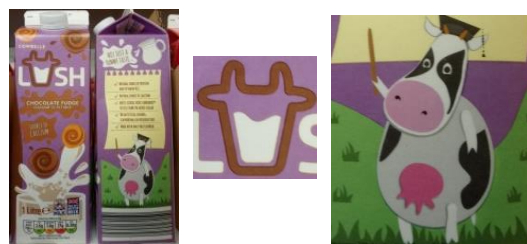

Moo milk

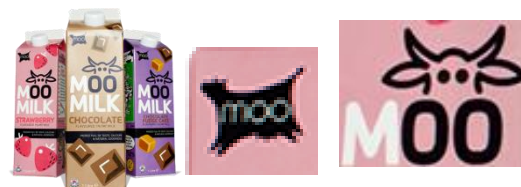

|                                      |                                                                                     |                                                                                    |
|--------------------------------------|-------------------------------------------------------------------------------------|------------------------------------------------------------------------------------|
| The cheese Emporium soft cheese      | 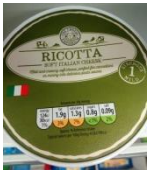   | 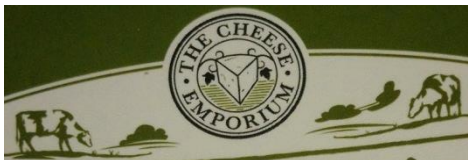 |
| Emporium quark cheese                | 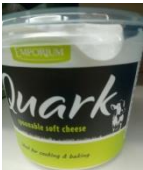   | 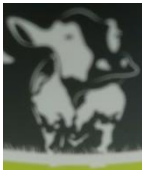  |
| Emporium kids cheese sticks          | 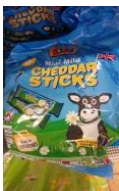   |                                                                                    |
| Emporium kids string cheese          | 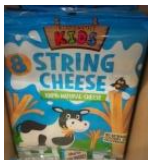   |                                                                                    |
| The cheese emporium cottage cheese   | 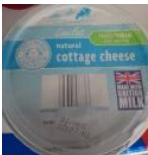 |                                                                                    |
| Emporium kids spread/triangle cheese | 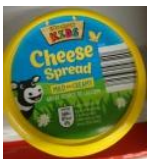 |                                                                                    |

**Figure S13.** Selected package images from Aldi with the cow sign.

**Table S28.** Aldi Summary.

| <b>Product</b> | <b>Quantity</b> | <b>Percent</b> |
|----------------|-----------------|----------------|
| Milk           | 3 of 4          | 75%            |
| Flavoured milk | 2 of 3          | 66,67%         |
| Yogurt         | 0 of 8          | 0%             |
| Cheese         | 6 of 14         | 42,86%         |
| Butter         | 0 of 2          | 0%             |
| Ice cream      | 1 of 8          | 12,5%          |
| <b>Total</b>   | <b>12 of 39</b> | <b>30,77%</b>  |

Summary of the percentage of Dairy products packages containing some cow representation in the data obtained from Aldi.

## 7. UK: Asda Data

**Table S29.** Milk.

| <b>Design package*</b>   | <b>Cow Representation</b> |
|--------------------------|---------------------------|
| Yeo organic              | y                         |
| Asda                     | y                         |
| Arla Lacto free          | y                         |
| Arla B.O.B               |                           |
| Mortons                  | y                         |
| Free range dairy farmers | y                         |
| Grahams jersey           | y                         |
| Moo                      | y                         |
| Sterilised               |                           |
| Muller                   |                           |
| Pro active               | y                         |
| Cravendale               |                           |
| <b>Total: 12</b>         | <b>8</b>                  |

\* Printed designs of Dairy products packages found at Asda. The letter y at the column "Cow representation" indicates that it was identified some cow representation in the respective package

**Table S30.** Flavoured Milk/Milk shake.

| <b>Design package*</b> | <b>Cow representation</b> |
|------------------------|---------------------------|
| Yazoo                  |                           |
| Crusha                 |                           |
| Arla protein           |                           |
| Frii (Mueller)         | y                         |
| Asda flavoured milk    | y                         |
| <b>Total: 5</b>        | <b>2</b>                  |

\* Printed designs of Dairy products packages found at Asda. The letter y at the column "Cow representation" indicates that it was identified some cow representation in the respective package.

**Table S31.** Yogurt/Fermented Milk/Milk Drink.

| <b>Design package*</b>    | <b>Cow representation</b> |
|---------------------------|---------------------------|
| For goodness              |                           |
| Asda smart price          |                           |
| Asda greek style          |                           |
| Asda Extra special        |                           |
| Asda natural yogurt       |                           |
| Yoplait Petit filous      |                           |
| Little yeos               | y                         |
| Dannone fromage frais     |                           |
| Kerry                     |                           |
| Arla                      |                           |
| Collective                | y                         |
| Liberté                   |                           |
| Onken                     |                           |
| Dale farm                 |                           |
| Loseley                   | y                         |
| Nestlé munch bunch        | y                         |
| Actmel kids               |                           |
| Milkbar                   | y                         |
| Nestlé (various flavours) |                           |
| Activia                   |                           |
| Oykos                     |                           |
| Mueller                   |                           |
| Sky                       |                           |
| Weight watchers           |                           |
| Yeo Valley                | y                         |
| Lancashire farm           | y                         |
| Vilage dairy              | y                         |
| Fage total                |                           |
| Nomadic                   | y                         |
| <b>Total: 30</b>          | <b>9</b>                  |

\* Printed designs of Dairy products packages found at Asda. The letter y at the column "Cow representation" indicates that it was identified some cow representation in the respective package.

Table S32. Cheese.

| Design package*                 | Cow representation |
|---------------------------------|--------------------|
| Asda cheese singles             | y                  |
| Asda smart price cheddar slices |                    |
| Asda smart price                |                    |
| Asda slices/grated              |                    |
| Asda Extra special              |                    |
| Asda various nationalities      |                    |
| Asda chosen by you              |                    |
| Lacto free soft cheese          | y                  |
| Buttlers cheese                 |                    |
| Dairylea                        | y                  |
| Cathedral                       |                    |
| Kerry Dairy                     | y                  |
| Gastard                         | y                  |
| Seriously strong                |                    |
| Loughing caw                    | y                  |
| Mexicana                        |                    |
| Pilgrams choice                 |                    |
| Low Low grated                  |                    |
| Butlers                         |                    |
| President                       |                    |
| Everest                         |                    |
| Le rustique                     |                    |
| Applewood                       |                    |
| Port Salut                      |                    |
| Paysen Breton                   |                    |
| Joseph heller                   |                    |
| Castelo                         |                    |
| Apetina                         |                    |
| Leerdamer                       |                    |
| Midas                           |                    |
| Yorkshire wensladale            | y                  |
| Galbani                         |                    |
| Primula                         |                    |
| Longlay farm                    |                    |
| Longlay farm cottage cheese     | y                  |
| Chestrings cheese               | y                  |
| Philadelphia                    |                    |
| <b>Total: 37</b>                | <b>9</b>           |

\* Printed designs of Dairy products packages found at Asda. The letter y at the column "Cow representation" indicates that it was identified some cow representation in the respective package.

**Table S33.** Butter.

| <b>Design package*</b> | <b>Cow representation</b> |
|------------------------|---------------------------|
| Asda smart price       |                           |
| Asda British           | y                         |
| AsdaExtra Special      |                           |
| Cowntry life           |                           |
| Anchor                 |                           |
| Lurpak                 |                           |
| Kerrygold              | y                         |
| Yeo Valley             | y                         |
| <b>Total: 8</b>        | <b>3</b>                  |

\* Printed designs of Dairy products packages found at Asda. The letter y at the column "Cow representation" indicates that it was identified some cow representation in the respective package.

**Table S34.** Ice cream.

| <b>Design package*</b>    | <b>Cow representation</b> |
|---------------------------|---------------------------|
| Magnum                    |                           |
| Carte D'or                |                           |
| Vieneta                   |                           |
| Wall's                    |                           |
| Kelly's of cornwal        | y                         |
| Caedburry Flake           |                           |
| Cardburry dairy Milk      |                           |
| Wall's mini Milk lollie   | y                         |
| Weight watchers           |                           |
| Cornetto                  |                           |
| Oreo                      |                           |
| Smatties                  |                           |
| Mars                      |                           |
| Yeo Valley                | y                         |
| Yo moo                    | y                         |
| Haagen Dazs               |                           |
| Ben e Jerrys              | y                         |
| Jo 2                      |                           |
| Oreo                      |                           |
| Mackies of Scotland       | y                         |
| Snickers                  |                           |
| Asda loaded               |                           |
| Asda Extra special        |                           |
| Asda Soft Scoop           |                           |
| Asda really creamy        |                           |
| Asda smart price          |                           |
| Asda sorbet/frozen yogurt |                           |
| Asda ice creams           |                           |
| <b>Total: 28</b>          | <b>6</b>                  |

\* Printed designs of Dairy products packages found at Asda. The letter y at the column "Cow representation" indicates that it was identified some cow representation in the respective package.

**Table S35.** Asda Summary.

| <b>Product</b> | <b>Quantity</b>  | <b>Percent</b> |
|----------------|------------------|----------------|
| Milk           | 8 of 12          | 66,67%         |
| Flavoured milk | 2 of 5           | 40%            |
| Yogurt         | 9 of 30          | 30%            |
| Cheese         | 9 of 37          | 24,32%         |
| Butter         | 3 of 8           | 37,5%          |
| Ice cream      | 6 of 28          | 21,43%         |
| <b>Total</b>   | <b>37 of 120</b> | <b>30,83%</b>  |

Summary of the percentage of Dairy products packages containing some cow representation in the data obtained from Asda.

## 8. UK: Tesco Data

**Table S36.** Tesco Summary.

| <b>Product</b> | <b>Quantity</b>  | <b>Percent</b> |
|----------------|------------------|----------------|
| Milk           | 5 of 6           | 83,33%         |
| Flavoured milk | 4 of 5           | 80%            |
| Yogurt         | 7 of 25          | 28%            |
| Cheese         | 10 of 36         | 27,28%         |
| Butter         | 1 of 6           | 16,67%         |
| Ice cream      | 9 of 35          | 25,71%         |
| <b>Total</b>   | <b>36 of 113</b> | <b>31,86%</b>  |

Summary of the percentage of Dairy products packages containing some cow representation in the data obtained from Tesco.
